# Supplementary material for: Tandem [5 + 1]/[8 + 2] cycloaddition reactions involving phosphiranes and tropones: facile access to 6,5,7-fused tricyclic skeletons
Source: Royal Society of Chemistry journal article supplement (doi:10.1039/d2qo00386d), 2022-01-01

# *Supporting Information*

## **Tandem [5+1]/[8+2] Cycloaddition Reactions Involving Phosphiranes and Tropones: A Facile Access to 6,5,7-Fused Tricyclic Skeleton**

**Mingyue Cui, Juan Li, Rongqiang Tian,\* Zheng Duan\***

a College of Chemistry, Green Catalysis Center, International Phosphorus Laboratory, International Joint Research Laboratory for Functional Organophosphorus Materials of Henan Province, Zhengzhou University, Zhengzhou 450001, P. R. China. E-mail: tianrq@zzu.edu.cn. duanzheng@zzu.edu.cn.

## Table of Contents

|                                                             |     |
|-------------------------------------------------------------|-----|
| General information .....                                   | S3  |
| Experimental Procedures and Characterization Data .....     | S3  |
| References .....                                            | S18 |
| X-ray crystallographic studies of compound <b>2a</b> .....  | S19 |
| X-ray crystallographic studies of compound <b>2a'</b> ..... | S21 |
| X-ray crystallographic studies of compound <b>3</b> .....   | S24 |
| NMR spectra .....                                           | S29 |

## General information

All reactions were performed under nitrogen using solvents dried by standard methods except for special statement. NMR spectra were obtained using BrukerAV300 spectrometer. All spectra were recorded in CDCl<sub>3</sub>. All coupling constants (*J* values) were reported in hertz (Hz). Chemical shifts were expressed in parts per million (ppm) downfield from internal TMS (<sup>1</sup>H). HRMS spectra were obtained on an Agilent 1290-6540 UHPLC Q-T of HR-MS spectrometer. X-ray crystallographic analyses were performed on an Oxford diffraction Gemini E diffractometer. Melting Point: heating rate: 4°C/min, the thermometer was not corrected. Silica gel (200-300 mesh) were used for the chromatographic separations. All commercially available reagents were used without further purification. 2-chloroethylphosphine W(CO)<sub>5</sub> complex<sup>1</sup>, 1-iminylphosphirane complexes (1a-1e)<sup>2</sup> and 2-methoxytropone<sup>3</sup> and 2-phenyltropone<sup>4</sup> were prepared according to literature method. All new compounds were synthetic in small scale and were purified by thin layer chromatography. The purities of the new compounds are acceptable according to NMR spectra analysis.

## Experimental Procedures and Characterization Data

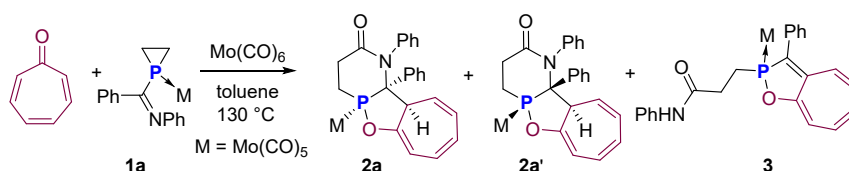

Under the atmosphere of N<sub>2</sub>, a solution of **1a** (143.09 mg, 0.30 mmol), Mo(CO)<sub>6</sub> (79.20 mg, 0.30 mmol) and tropone (58.35 μL, 0.60 mmol) in toluene (6 mL) were stirred at 130 °C for 4 h in a heavy wall pressure tube (75 mL). The precipitate was filtered off, and the filtrate was concentrated under vacuum. The resulting brown oil was further purified by thin layer chromatography (petroleum ether/dichloromethane = 2:3), yielding **2a** (34.83 mg, 0.06 mmol, 19%, R<sub>f</sub> = 0.61) as brown solid, **2a'** (32.99 mg, 0.05 mmol, 18%, R<sub>f</sub> = 0.38) as brown solid and **3** (29.33 mg, 0.05 mmol, 16%, R<sub>f</sub> = 0.80) as red solid. Single crystals of **2a**, **2a'** and **3** were grown from a mixed solvent of *n*-hexane/dichloromethane (5:1) at room temperature by slow evaporation.

**2a: m.p. > 294 °C (dec).** <sup>31</sup>P NMR (121 MHz, CDCl<sub>3</sub>) δ: 164.0 (s). <sup>1</sup>H NMR (300 MHz, CDCl<sub>3</sub>) δ: 7.17 – 7.01 (m, 10H, CH), 6.78 – 6.64 (m, 2H, CH), 6.51 – 6.46 (m, 1H, CH), 6.12 (d, *J* = 6.0 Hz, 1H, CH), 5.71 (dd, *J* = 9.6, *J* = 4.8 Hz, 1H, CH), 3.48 – 3.17 (m, 4H, CH<sub>2</sub>, CH), 2.25 – 2.19 (m, 1H, CH<sub>2</sub>). <sup>13</sup>C NMR (75 MHz, CDCl<sub>3</sub>) δ: 207.5 (d, *J*<sub>CP</sub> = 33.8 Hz, CO *trans*), 203.3 (d, *J*<sub>CP</sub> = 7.5 Hz, CO *cis*), 170.1 (d, *J*<sub>CP</sub> = 3.8 Hz, CO), 148.9 (d, *J*<sub>CP</sub> = 9.8 Hz, C), 139.6 (d, *J*<sub>CP</sub> = 3.8 Hz, C), 138.6 (d, *J*<sub>CP</sub> = 1.5 Hz, C), 129.7 (s, CH), 128.5 (d, *J*<sub>CP</sub> = 3.0 Hz, CH), 128.4 (s, CH, two kinds of carbon signals overlapping), 128.1 (s, CH, two kinds of carbon signals overlapping), 127.4 (s, CH), 127.2 (s, CH), 127.0 (s, CH), 120.7 (s, CH), 103.1 (d, *J*<sub>CP</sub> = 3.8 Hz, CH), 75.4 (d, *J*<sub>CP</sub> = 9.0 Hz, C), 50.4 (d, *J*<sub>CP</sub> = 3.0 Hz, CH), 28.6 (d, *J*<sub>CP</sub> = 3.8 Hz, CH<sub>2</sub>), 25.9 (d, *J*<sub>CP</sub> = 6.0 Hz, CH<sub>2</sub>). **HRMS (ESI):** *m/z* calcd for C<sub>28</sub>H<sub>21</sub>MoNO<sub>7</sub>P (M+H)<sup>+</sup> 612.0104, found 612.0103.

**2a': m.p. 164.7 – 165.5 °C.** <sup>31</sup>P NMR (121 MHz, CDCl<sub>3</sub>) δ: 169.5 (s). <sup>1</sup>H NMR (300 MHz, CDCl<sub>3</sub>) δ: 7.40 – 7.30 (m, 3H, CH), 7.15 – 7.05 (m, 5H, CH), 6.70 – 6.64 (m, 1H, CH), 6.55 – 6.49 (m, 1H, CH), 6.32 (bs, 2H, CH), 6.19 – 6.14 (m, 1H, CH), 6.06 (d, *J* = 6.0 Hz, 1H, CH), 5.31 (dd, *J* = 9.0, *J* = 5.7 Hz, 1H, CH), 3.32 – 2.86 (m, 5H, CH<sub>2</sub>, CH). <sup>13</sup>C NMR (75 MHz, CDCl<sub>3</sub>) δ: 207.7 (d, *J*<sub>CP</sub> = 32.3 Hz, CO *trans*), 203.5 (d, *J*<sub>CP</sub> = 9.8 Hz, CO *cis*), 168.7 (d, *J*<sub>CP</sub> = 5.3 Hz, CO), 143.6 (s, C), 137.8 (s, C), 135.6 (d, *J*<sub>CP</sub> = 10.5 Hz, C), 131.3 (d, *J*<sub>CP</sub> = 8.3 Hz, CH), 130.8 (s, CH), 129.3 (s, CH), 129.2 (s, CH), 128.7 (s, CH, two kinds of carbon signals overlapping), 128.0 (s, CH), 126.8 (s, CH), 125.1 (s, CH), 118.6 (s, CH), 102.2 (d, *J*<sub>CP</sub> = 5.3 Hz, CH), 75.8 (s, C), 49.0 (d, *J*<sub>CP</sub> = 7.5 Hz, CH), 31.3 (d, *J*<sub>CP</sub> = 11.3 Hz, CH<sub>2</sub>), 28.2 (d, *J*<sub>CP</sub> = 3.8 Hz, CH<sub>2</sub>). **HRMS (ESI):** *m/z* calcd for C<sub>28</sub>H<sub>21</sub>MoNO<sub>7</sub>P (M+H)<sup>+</sup> 612.0104, found 612.0104.

**3: m.p. 170.9 – 171.5 °C.** <sup>31</sup>P NMR (121 MHz, CDCl<sub>3</sub>) δ: 182.2 (s). <sup>1</sup>H NMR (300 MHz, CDCl<sub>3</sub>) δ: 7.50 – 7.25 (m, 9H, CH), 7.13 – 7.08 (m, 1H, CH), 6.55 (d, *J* = 12.0 Hz, 1H, CH), 6.11 – 6.01 (m, 2H, CH), 5.95 – 5.87 (m, 2H, CH), 2.79 – 2.59 (m, 4H, CH<sub>2</sub>). <sup>13</sup>C NMR (75 MHz, CDCl<sub>3</sub>) δ: 209.3 (d, *J*<sub>CP</sub> = 29.3 Hz, CO *trans*), 204.1 (d, *J*<sub>CP</sub> = 10.5 Hz, CO *cis*), 169.1 (d, *J*<sub>CP</sub> = 9.0 Hz, CO), 167.4 (d, *J*<sub>CP</sub> = 6.8 Hz, C), 141.6 (d, *J*<sub>CP</sub> = 9.0 Hz, C), 137.6 (s, C), 132.8 (s, CH), 132.2 (d, *J*<sub>CP</sub> = 15.0 Hz, C), 131.3 (s, CH), 129.4 (s, CH), 129.1 (s, CH), 128.6 (s, CH), 128.3 (d, *J*<sub>CP</sub> = 5.3 Hz, CH), 126.8

(d,  $J_{CP} = 14.2$  Hz, CH), 126.6 (d,  $J_{CP} = 9.8$  Hz, CH), 124.6 (s, CH), 123.6 (d,  $J_{CP} = 27.0$  Hz, C), 119.8 (s, CH), 110.2 (d,  $J_{CP} = 3.5$  Hz, CH), 40.1 (d,  $J_{CP} = 4.7$  Hz, CH<sub>2</sub>), 30.7 (d,  $J_{CP} = 4.3$  Hz, CH<sub>2</sub>). **HRMS (ESI):** m/z calcd for C<sub>28</sub>H<sub>21</sub>MoNO<sub>7</sub>P (M+H)<sup>+</sup> 612.0104, found 612.0105.

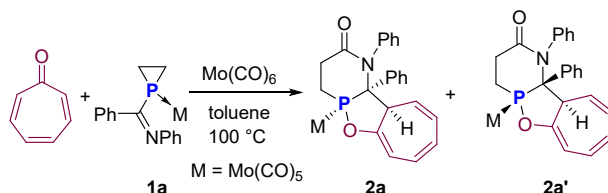

Under the atmosphere of N<sub>2</sub>, a solution of **1a** (143.09 mg, 0.30 mmol), Mo(CO)<sub>6</sub> (79.20 mg, 0.30 mmol) and tropone (58.35 μL, 0.60 mmol) in toluene (6 mL) were stirred at 100 °C for 4 h in a heavy wall pressure tube (75 mL). The precipitate was filtered off, and the filtrate was concentrated under vacuum. The resulting brown oil was further purified by thin layer chromatography (petroleum ether/dichloromethane = 2:3), yielding **2a** (75.15 mg, 0.12 mmol, 41%, R<sub>f</sub> = 0.61) as brown solid and **2a'** (43.99 mg, 0.07 mmol, 24%, R<sub>f</sub> = 0.38) as brown solid.

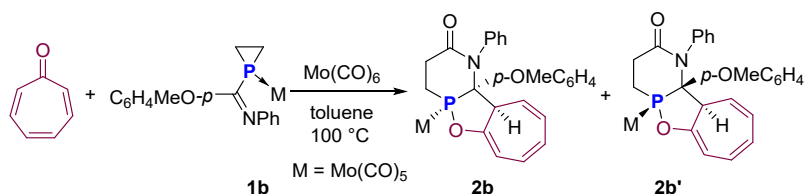

Under the atmosphere of N<sub>2</sub>, a solution of **1b** (152.09 mg, 0.30 mmol), Mo(CO)<sub>6</sub> (79.20 mg, 0.30 mmol) and tropone (58.35 μL, 0.60 mmol) in toluene (6 mL) were stirred at 100 °C for 4 h in a heavy wall pressure tube (75 mL). The precipitate was filtered off, and the filtrate was concentrated under vacuum. The resulting brown oil was further purified by thin layer chromatography (petroleum ether/dichloromethane = 1:7), yielding **2b** (88.46 mg, 0.14 mmol, 46%, R<sub>f</sub> = 0.54) as yellowish solid and **2b'** (65.38 mg, 0.10 mmol, 34%, R<sub>f</sub> = 0.35) as yellow solid.

**2b: m.p. > 280 °C (dec).** <sup>31</sup>P NMR (121 MHz, CDCl<sub>3</sub>) δ: 164.2 (s). <sup>1</sup>H NMR (300 MHz, CDCl<sub>3</sub>) δ: 7.17 – 7.12 (m, 3H, CH), 7.05 – 7.03 (m, 4H, CH), 6.75 – 6.61 (m, 4H, CH), 6.48 – 6.43 (m, 1H, CH), 6.10 – 6.08 (m, 1H, CH), 5.70 – 5.66 (m, 1H, CH), 3.62 (s, 3H, OCH<sub>3</sub>), 3.37 – 3.13 (m, 4H, CH<sub>2</sub>, CH), 2.21 – 2.16 (m, 1H, CH<sub>2</sub>). <sup>13</sup>C NMR (75 MHz, CDCl<sub>3</sub>) δ: 207.7 (d,  $J_{CP} = 34.5$  Hz, CO *trans*), 203.5 (d,  $J_{CP} = 9.8$  Hz,

CO *cis*), 170.2 (d,  $J_{CP} = 3.8$  Hz, CO), 159.5 (d,  $J_{CP} = 2.3$  Hz, C), 149.0 (d,  $J_{CP} = 9.8$  Hz, C), 139.6 (d,  $J_{CP} = 3.0$  Hz, C), 130.4 (d,  $J_{CP} = 0.8$  Hz, C), 129.7 (s, CH), 128.5 (s, CH, two kinds of carbon signals overlapping), 128.2 (s, CH, two kinds of carbon signals overlapping), 127.4 (s, CH), 127.1 (d,  $J_{CP} = 6.0$  Hz, CH), 120.8 (s, CH), 113.8 (s, CH), 103.1 (d,  $J_{CP} = 4.5$  Hz, CH), 74.9 (d,  $J_{CP} = 10.5$  Hz, C), 55.2 (s, OCH<sub>3</sub>), 50.5 (d,  $J_{CP} = 3.8$  Hz, CH), 28.6 (d,  $J_{CP} = 3.8$  Hz, CH<sub>2</sub>), 25.7 (d,  $J_{CP} = 6.0$  Hz, CH<sub>2</sub>). **HRMS (ESI):** m/z calcd for C<sub>29</sub>H<sub>23</sub>MoNO<sub>8</sub>P (M+H)<sup>+</sup> 642.0210, found 642.0211.

**2b'**: m.p. > 280 °C (dec). <sup>31</sup>P NMR (121 MHz, CDCl<sub>3</sub>) δ: 171.2 (s). <sup>1</sup>H NMR (300 MHz, CDCl<sub>3</sub>) δ: 7.16 – 7.10 (m, 3H, CH), 7.05 – 7.02 (m, 2H, CH), 6.87 – 6.84 (m, 2H, CH), 6.70 – 6.65 (m, 1H, CH), 6.54 – 6.49 (m, 1H, CH), 6.34 (bs, 2H, CH), 6.18 – 6.14 (m, 1H, CH), 6.05 (d,  $J = 5.7$  Hz, 1H, CH), 5.33 – 5.28 (m, 1H, CH), 3.80 (s, 3H, OCH<sub>3</sub>), 3.31 – 2.83 (m, 5H, CH<sub>2</sub>, CH). <sup>13</sup>C NMR (75 MHz, CDCl<sub>3</sub>) δ: 207.8 (d,  $J_{CP} = 32.3$  Hz, CO *trans*), 203.5 (d,  $J_{CP} = 9.8$  Hz, CO *cis*), 168.7 (d,  $J_{CP} = 5.3$  Hz, CO), 160.1 (s, C), 143.6 (s, C), 137.8 (s, C), 132.6 (d,  $J_{CP} = 7.5$  Hz, CH), 130.8 (s, CH), 129.2 (s, CH), 128.7 (s, CH), 128.0 (s, CH), 127.4 (d,  $J_{CP} = 11.3$  Hz, C), 126.7 (s, CH), 125.1 (s, CH), 118.7 (s, CH), 114.0 (s, CH), 102.1 (d,  $J_{CP} = 5.3$  Hz, CH), 75.4 (s, C), 55.5 (s, OCH<sub>3</sub>), 49.1 (d,  $J_{CP} = 6.8$  Hz, CH), 31.1 (d,  $J_{CP} = 11.3$  Hz, CH<sub>2</sub>), 28.1 (d,  $J_{CP} = 4.5$  Hz, CH<sub>2</sub>). **HRMS (ESI):** m/z calcd for C<sub>29</sub>H<sub>23</sub>MoNO<sub>8</sub>P (M+H)<sup>+</sup> 642.0210, found 642.0213.

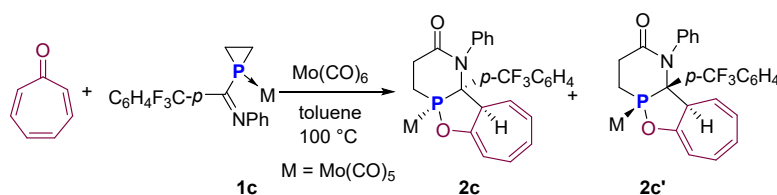

Under the atmosphere of N<sub>2</sub>, a solution of **1c** (163.49 mg, 0.30 mmol), Mo(CO)<sub>6</sub> (79.20 mg, 0.30 mmol) and tropone (58.35 μL, 0.60 mmol) in toluene (6 mL) were stirred at 100 °C for 4 h in a heavy wall pressure tube (75 mL). The precipitate was filtered off, and the filtrate was concentrated under vacuum. The resulting brown oil was further purified by thin layer chromatography (petroleum ether/dichloromethane = 1:4), yielding **2c** (91.66 mg, 0.13 mmol, 45%, R<sub>f</sub> = 0.68) as brown oil and **2c'** (36.67 mg, 0.05 mmol, 18%, R<sub>f</sub> = 0.45) as brown oil.

**2c**:  $^{31}\text{P}$  NMR (121 MHz,  $\text{CDCl}_3$ )  $\delta$ : 164.6 (s).  $^1\text{H}$  NMR (300 MHz,  $\text{CDCl}_3$ )  $\delta$ : 7.43 (d,  $J = 7.5$  Hz, 3H, CH). 7.16 – 7.06 (m, 6H, CH), 6.77 – 6.64 (m, 2H, CH), 6.51 – 6.47 (m, 1H, CH), 6.14 (d,  $J = 5.7$  Hz, 1H, CH), 5.72 – 5.67 (m, 1H, CH), 3.45 – 3.17 (m, 4H,  $\text{CH}_2$ , CH), 2.23 (d,  $J = 12.6$  Hz, 1H,  $\text{CH}_2$ ).  $^{13}\text{C}$  NMR (75 MHz,  $\text{CDCl}_3$ )  $\delta$ : 207.0 (d,  $J_{\text{CP}} = 33.8$  Hz, CO *trans*), 203.2 (d,  $J_{\text{CP}} = 9.8$  Hz, CO *cis*), 169.9 (d,  $J_{\text{CP}} = 3.8$  Hz, CO), 148.6 (d,  $J_{\text{CP}} = 9.8$  Hz, C), 143.1 (s, C), 139.3 (d,  $J_{\text{CP}} = 3.0$  Hz, C), 130.6 (qd,  $J_{\text{CF}} = 33.0$ ,  $J_{\text{CP}} = 3.0$  Hz, C), 129.7 (s, CH), 128.7 (s, CH), 127.9 (s, CH, two kinds of carbon signals overlapping), 127.7 (s, CH), 127.5 (s, CH), 127.3 (s, CH), 125.6 – 125.2 (m, CH), 123.6 (q,  $J_{\text{CF}} = 270.0$  Hz,  $\text{CF}_3$ ), 120.4 (s, CH), 103.5 (d,  $J_{\text{CP}} = 3.8$  Hz, CH), 75.6 (d,  $J_{\text{CP}} = 7.5$  Hz, C), 50.6 (s, CH), 28.5 (d,  $J_{\text{CP}} = 3.0$  Hz,  $\text{CH}_2$ ), 26.0 (d,  $J_{\text{CP}} = 6.0$  Hz,  $\text{CH}_2$ ). **HRMS (ESI)**:  $m/z$  calcd for  $\text{C}_{29}\text{H}_{20}\text{MoNO}_7\text{PF}_3$  ( $\text{M}+\text{H}$ ) $^+$  679.9978, found 679.9979.

**2c'**:  $^{31}\text{P}$  NMR (121 MHz,  $\text{CDCl}_3$ )  $\delta$ : 167.5 (s).  $^1\text{H}$  NMR (300 MHz,  $\text{CDCl}_3$ )  $\delta$ : 7.62 (d,  $J = 8.1$  Hz, 2H, CH), 7.32 (d,  $J = 8.1$  Hz, 2H, CH), 7.23 – 7.09 (m, 3H, CH), 6.71 – 6.65 (m, 1H, CH), 6.57 – 6.51 (m, 1H, CH), 6.38 (d,  $J = 3.9$  Hz, 2H, CH), 6.18 (dd,  $J = 9.0$ ,  $J = 5.7$  Hz, 1H, CH), 6.09 (d,  $J = 6.0$  Hz, 1H, CH), 5.20 – 5.16 (m, 1H, CH), 3.35 – 2.84 (m, 5H,  $\text{CH}_2$ , CH).  $^{13}\text{C}$  NMR (75 MHz,  $\text{CDCl}_3$ )  $\delta$ : 207.1 (d,  $J_{\text{CP}} = 32.3$  Hz, CO *trans*), 203.3 (d,  $J_{\text{CP}} = 9.8$  Hz, CO *cis*), 168.7 (d,  $J_{\text{CP}} = 4.5$  Hz, CO), 143.8 (d,  $J_{\text{CP}} = 1.5$  Hz, C), 139.8 (d,  $J_{\text{CP}} = 9.8$  Hz, C), 137.8 (d,  $J_{\text{CP}} = 0.8$  Hz, C), 131.6 (d,  $J_{\text{CP}} = 7.5$  Hz, CH), 131.3 (qd,  $J_{\text{CF}} = 33.0$  Hz,  $J_{\text{CP}} = 0.8$  Hz, C), 130.7 (s, CH), 129.2 (s, CH), 128.9 (s, CH), 128.3 (s, CH), 127.0 (s, CH), 125.6 (s, CH), 125.5 (d,  $J_{\text{CP}} = 3.8$  Hz, CH), 123.6 (q,  $J_{\text{CF}} = 270.8$  Hz,  $\text{CF}_3$ ), 118.3 (s, CH), 102.6 (d,  $J_{\text{CP}} = 5.3$  Hz, CH), 75.5 (s, C), 49.1 (d,  $J_{\text{CP}} = 6.8$  Hz, CH), 31.2 (d,  $J_{\text{CP}} = 11.3$  Hz,  $\text{CH}_2$ ), 28.1 (d,  $J_{\text{CP}} = 3.0$  Hz,  $\text{CH}_2$ ). **HRMS (ESI)**:  $m/z$  calcd for  $\text{C}_{29}\text{H}_{20}\text{MoNO}_7\text{PF}_3$  ( $\text{M}+\text{H}$ ) $^+$  679.9978, found 679.9979.

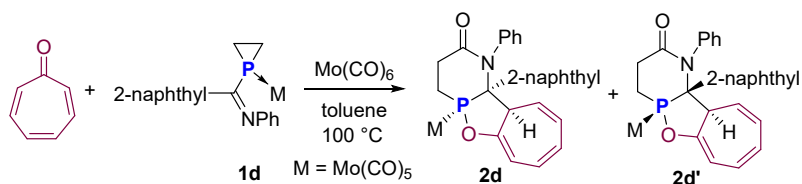

Under the atmosphere of  $\text{N}_2$ , a solution of **1d** (158.09 mg, 0.30 mmol),  $\text{Mo(CO)}_6$

(79.20 mg, 0.30 mmol) and tropone (58.35  $\mu$ L, 0.60 mmol) in toluene (6 mL) were stirred at 100 °C for 4 h in a heavy wall pressure tube (75 mL). The precipitate was filtered off, and the filtrate was concentrated under vacuum. The resulting brown oil was further purified by thin layer chromatography (petroleum ether/dichloromethane = 1:2), yielding **2d** (71.39 mg, 0.11 mmol, 36%,  $R_f$  = 0.54) as brown oil and **2d'** (67.42 mg, 0.10 mmol, 34%,  $R_f$  = 0.31) as brown oil.

**2d:**  $^{31}\text{P}$  NMR (121 MHz,  $\text{CDCl}_3$ )  $\delta$ : 160.0 (s).  $^1\text{H}$  NMR (300 MHz,  $\text{CDCl}_3$ )  $\delta$ : 7.66 – 7.63 (m, 4H, CH), 7.39 – 7.37 (m, 3H, CH), 7.14 – 7.06 (m, 4H, CH), 6.96 – 6.94 (m, 1H, CH), 6.82 – 6.76 (m, 1H, CH), 6.71 – 6.66 (m, 1H, CH), 6.52 – 6.47 (m, 1H, CH), 6.17 (d,  $J$  = 6.0 Hz, 1H, CH), 5.77 – 5.72 (m, 1H, CH), 3.46 – 3.24 (m, 4H,  $\text{CH}_2$ , CH), 2.22 (d,  $J$  = 12.9 Hz, 1H,  $\text{CH}_2$ ).  $^{13}\text{C}$  NMR (75 MHz,  $\text{CDCl}_3$ )  $\delta$ : 207.4 (d,  $J_{\text{CP}}$  = 34.5 Hz, CO *trans*), 203.3 (d,  $J_{\text{CP}}$  = 9.8 Hz, CO *cis*), 170.2 (d,  $J_{\text{CP}}$  = 3.8 Hz, CO), 149.0 (d,  $J_{\text{CP}}$  = 9.0 Hz, C), 139.7 (d,  $J_{\text{CP}}$  = 2.3 Hz, C), 136.2 (s, C), 132.91 (s, C), 132.88 (s, C), 129.8 (s, CH), 128.5 (s, CH, three kinds of carbon signals overlapping), 128.1 (s, CH, three kinds of carbon signals overlapping), 127.5 (s, CH), 127.4 (s, CH), 127.2 (s, CH), 127.1 (s, CH), 126.9 (s, CH), 126.5 (s, CH), 120.8 (s, CH), 103.2 (d,  $J_{\text{CP}}$  = 3.8 Hz, CH), 75.7 (d,  $J_{\text{CP}}$  = 9.0 Hz, C), 50.6 (d,  $J_{\text{CP}}$  = 2.3 Hz, CH), 28.6 (d,  $J_{\text{CP}}$  = 3.8 Hz,  $\text{CH}_2$ ), 25.9 (d,  $J_{\text{CP}}$  = 6.0 Hz,  $\text{CH}_2$ ). HRMS (ESI):  $m/z$  calcd for  $\text{C}_{32}\text{H}_{23}\text{MoNO}_7\text{P}$  ( $\text{M}+\text{H}$ ) $^+$  662.0261, found 662.0259.

**2d':**  $^{31}\text{P}$  NMR (121 MHz,  $\text{CDCl}_3$ )  $\delta$ : 170.7 (s).  $^1\text{H}$  NMR (300 MHz,  $\text{CDCl}_3$ )  $\delta$ : 7.84 – 7.82 (m, 2H, CH), 7.76 – 7.70 (m, 2H, CH), 7.56 – 7.48 (m, 2H, CH), 7.17 – 7.03 (m, 4H, CH), 6.71 – 6.65 (m, 1H, CH), 6.57 – 6.51 (m, 1H, CH), 6.38 (bs, 2H, CH), 6.20 – 6.15 (m, 1H, CH), 6.09 (d,  $J$  = 5.7 Hz, 1H, CH), 5.35 – 5.30 (m, 1H, CH), 3.33 – 2.97 (m, 5H,  $\text{CH}_2$ , CH).  $^{13}\text{C}$  NMR (75 MHz,  $\text{CDCl}_3$ )  $\delta$ : 207.6 (d,  $J_{\text{CP}}$  = 32.3 Hz, CO *trans*), 203.5 (d,  $J_{\text{CP}}$  = 9.8 Hz, CO *cis*), 169.0 (d,  $J_{\text{CP}}$  = 5.3 Hz, CO), 143.9 (s, C), 137.9 (s, C), 133.0 (s, C), 132.9 (d,  $J_{\text{CP}}$  = 9.8 Hz, C), 132.7 (s, C), 131.4 (d,  $J_{\text{CP}}$  = 9.0 Hz, CH), 130.8 (s, CH), 129.2 (s, CH), 128.8 (s, CH), 128.5 (s, CH), 128.2 (s, CH), 128.1 (s, CH), 127.8 (d,  $J_{\text{CP}}$  = 6.8 Hz, CH), 127.7 (s, CH), 127.5 (s, CH), 127.0 (s, CH), 126.9 (s, CH), 125.3 (s, CH), 118.8 (s, CH), 102.4 (d,  $J_{\text{CP}}$  = 5.3 Hz, CH), 76.0 (s, C), 49.2 (d,  $J_{\text{CP}}$  = 6.0 Hz, CH), 31.4 (d,  $J_{\text{CP}}$  = 11.3 Hz,  $\text{CH}_2$ ), 28.4 (d,  $J_{\text{CP}}$  = 4.5 Hz,



CH<sub>2</sub>). **HRMS (ESI):** m/z calcd for C<sub>32</sub>H<sub>22</sub>MoNO<sub>7</sub>PNa (M+Na)<sup>+</sup> 684.0080, found 684.0081.

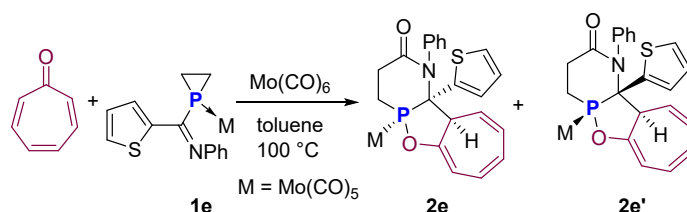

Under the atmosphere of N<sub>2</sub>, a solution of **1e** (144.88 mg, 0.30 mmol), Mo(CO)<sub>6</sub> (79.20 mg, 0.30 mmol) and tropone (58.35 μL, 0.60 mmol) in toluene (6 mL) were stirred at 100 °C for 4 h in a heavy wall pressure tube (75 mL). The precipitate was filtered off, and the filtrate was concentrated under vacuum. The resulting brown oil was further purified by thin layer chromatography (petroleum ether/dichloromethane = 1:5), yielding **2e** (90.69 mg, 0.15 mmol, 49%, R<sub>f</sub> = 0.65) as brown solid and **2e'** (44.42 mg, 0.07 mmol, 24%, R<sub>f</sub> = 0.45) as brown solid.

**2e: m.p. 123.5 – 124.3 °C. <sup>31</sup>P NMR (121 MHz, CDCl<sub>3</sub>) δ:** 164.5 (s). **<sup>1</sup>H NMR (300 MHz, CDCl<sub>3</sub>) δ:** 7.21 – 7.06 (m, 6H, CH), 6.81 – 6.59 (m, 4H, CH), 6.46 – 6.41 (m, 1H, CH), 6.14 (d, *J* = 6.0 Hz, 1H, CH), 5.61 (dd, *J* = 9.3, *J* = 4.8 Hz, 1H, CH), 3.43 – 3.12 (m, 4H, CH, CH<sub>2</sub>), 2.22 – 2.18 (m, 1H, CH). **<sup>13</sup>C NMR (75 MHz, CDCl<sub>3</sub>) δ:** 207.4 (d, *J*<sub>CP</sub> = 34.5 Hz, CO *trans*), 203.4 (d, *J*<sub>CP</sub> = 9.8 Hz, CO *cis*), 169.6 (d, *J*<sub>CP</sub> = 3.8 Hz, CO), 148.3 (d, *J*<sub>CP</sub> = 9.8 Hz, C), 142.9 (s, C), 139.6 (d, *J*<sub>CP</sub> = 3.8 Hz, C), 129.9 (s, CH), 128.5 (s, CH), 128.4 (d, *J*<sub>CP</sub> = 6.0 Hz, CH), 128.3 (s, CH), 127.4 (s, CH), 127.3 (s, CH), 127.1 (s, CH), 126.8 (d, *J*<sub>CP</sub> = 2.3 Hz, CH), 126.4 (d, *J*<sub>CP</sub> = 3.0 Hz, CH), 120.4 (s, CH), 103.8 (d, *J*<sub>CP</sub> = 3.8 Hz, CH), 74.0 (d, *J*<sub>CP</sub> = 12.0 Hz, C), 52.9 (d, *J*<sub>CP</sub> = 3.8 Hz, CH), 28.6 (d, *J*<sub>CP</sub> = 3.0 Hz, CH<sub>2</sub>), 25.7 (d, *J*<sub>CP</sub> = 6.0 Hz, CH<sub>2</sub>). **HRMS (ESI):** m/z calcd for C<sub>26</sub>H<sub>19</sub>MoNO<sub>7</sub>PS (M+H)<sup>+</sup> 617.9668, found 617.9671.

**2e': m.p. > 280 °C (dec). <sup>31</sup>P NMR (121 MHz, CDCl<sub>3</sub>) δ:** 172.2 (s). **<sup>1</sup>H NMR (300 MHz, CDCl<sub>3</sub>) δ:** 7.50 (d, *J* = 4.8 Hz, 1H, CH), 7.22 – 7.13 (m, 3H, CH), 6.98 – 6.95 (m, 1H, CH), 6.81 (d, *J* = 3.6 Hz, 1H, CH), 6.69 – 6.64 (m, 1H, CH), 6.54 – 6.48 (m, 3H, CH), 6.20 (dd, *J* = 9.0, *J* = 5.7 Hz, 1H, CH), 6.06 (d, *J* = 6.0 Hz, 1H, CH), 5.59 – 5.54 (m, 1H, CH), 3.22 – 2.91 (m, 5H, CH<sub>2</sub>, CH). **<sup>13</sup>C NMR (75 MHz, CDCl<sub>3</sub>) δ:** 207.5 (d, *J*<sub>CP</sub> = 32.3 Hz, CO *trans*), 203.4 (d, *J*<sub>CP</sub> = 9.8 Hz, CO *cis*), 168.9 (d, *J*<sub>CP</sub> = 4.5

Hz, CO), 143.0 (s, C), 137.9 (d,  $J_{CP} = 13.5$  Hz, C), 137.3 (s, C), 132.0 (d,  $J_{CP} = 6.8$  Hz, CH), 130.2 (s, CH), 129.3 (s, CH), 128.8 (s, CH), 128.2 (s, CH), 127.7 (s, CH), 127.0 (s, CH), 126.9 (s, CH), 125.4 (s, CH), 118.0 (s, CH), 102.3 (d,  $J_{CP} = 6.0$  Hz, CH), 72.3 (s, C), 50.2 (d,  $J_{CP} = 6.0$  Hz, CH), 31.0 (d,  $J_{CP} = 12.0$  Hz, CH<sub>2</sub>), 28.2 (d,  $J_{CP} = 4.5$  Hz, CH<sub>2</sub>). **HRMS (ESI):**  $m/z$  calcd for C<sub>26</sub>H<sub>19</sub>MoNO<sub>7</sub>PS (M+H)<sup>+</sup> 617.9668, found 617.9666.

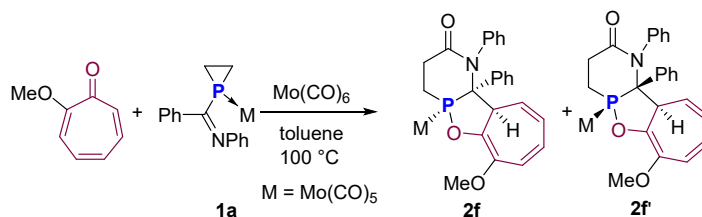

Under the atmosphere of N<sub>2</sub>, a solution of **1a** (143.09 mg, 0.30 mmol), Mo(CO)<sub>6</sub> (79.20 mg, 0.30 mmol) and 2-methoxytropone (81.63 mg, 0.60 mmol) in toluene (6 mL) were stirred at 100 °C for 4 h in a heavy wall pressure tube (75 mL). The precipitate was filtered off, and the filtrate was concentrated under vacuum. The resulting brown oil was further purified by thin layer chromatography (petroleum ether/ethyl acetate = 2:1), yielding **2f** (44.23 mg, 0.07 mmol, 23%, R<sub>f</sub> = 0.71) as yellow oil and **2f'** (28.85 mg, 0.05 mmol, 15%, R<sub>f</sub> = 0.30) as yellow oil.

**2f:** <sup>31</sup>P NMR (121 MHz, CDCl<sub>3</sub>) δ: 164.7 (s). <sup>1</sup>H NMR (300 MHz, CDCl<sub>3</sub>) δ: 7.19 – 7.11 (m, 7H, CH), 7.05 – 7.01 (m, 3H, CH), 6.75 – 6.61 (m, 2H, CH), 6.42 – 6.37 (m, 1H, CH), 5.83 (dd,  $J = 9.3$ ,  $J = 5.1$  Hz, 1H, CH), 3.81 (s, 3H, OCH<sub>3</sub>), 3.49 – 3.11 (m, 4H, CH<sub>2</sub>, CH), 2.28 – 2.23 (m, 1H, CH<sub>2</sub>). <sup>13</sup>C NMR (75 MHz, CDCl<sub>3</sub>) δ: 207.6 (d,  $J_{CP} = 33.8$  Hz, CO *trans*), 203.4 (d,  $J_{CP} = 10.5$  Hz, CO *cis*), 170.1 (d,  $J_{CP} = 4.5$  Hz, CO), 139.5 (d,  $J_{CP} = 3.0$  Hz, C), 138.5 (d,  $J_{CP} = 1.5$  Hz, C), 137.0 (d,  $J_{CP} = 4.5$  Hz, C), 134.4 (d,  $J_{CP} = 8.3$  Hz, C), 128.6 (d,  $J_{CP} = 2.3$  Hz, CH), 128.4 (s, CH, two kinds of carbon signals overlapping), 128.1 (s, CH), 128.07 (s, CH, two kinds of carbon signals overlapping), 128.0 (s, CH), 127.0 (s, CH), 126.1 (s, CH), 123.3 (s, CH), 75.8 (d,  $J_{CP} = 8.3$  Hz, C), 59.8 (s, OCH<sub>3</sub>), 48.1 (d,  $J_{CP} = 3.0$  Hz, CH), 28.6 (d,  $J_{CP} = 3.8$  Hz, CH<sub>2</sub>), 25.9 (d,  $J_{CP} = 6.0$  Hz, CH<sub>2</sub>). **HRMS (ESI):**  $m/z$  calcd for C<sub>29</sub>H<sub>23</sub>MoNO<sub>8</sub>P (M+H)<sup>+</sup> 642.0210, found 642.0213.

**2f':** <sup>31</sup>P NMR (121 MHz, CDCl<sub>3</sub>) δ: 172.5 (s). <sup>1</sup>H NMR (300 MHz, CDCl<sub>3</sub>) δ: 7.42 –

7.34 (m, 3H, CH), 7.21 – 7.11 (m, 5H, CH), 6.67 – 6.52 (m, 2H, CH), 6.38 (bs, 2H, CH), 6.12 – 6.08 (m, 1H, CH), 5.46 – 5.41 (m, 1H, CH), 3.67 (s, 3H, OCH<sub>3</sub>), 3.32 – 2.91 (m, 5H, CH<sub>2</sub>, CH). <sup>13</sup>C NMR (75 MHz, CDCl<sub>3</sub>) δ: 207.6 (d, *J*<sub>CP</sub> = 32.3 Hz, CO *trans*), 203.6 (d, *J*<sub>CP</sub> = 9.8 Hz, CO *cis*), 168.9 (d, *J*<sub>CP</sub> = 4.5 Hz, CO), 137.8 (s, C), 136.9 (d, *J*<sub>CP</sub> = 6.0 Hz, C), 135.4 (d, *J*<sub>CP</sub> = 11.3 Hz, C), 131.2 (d, *J*<sub>CP</sub> = 8.3 Hz, CH), 130.7 (s, CH), 129.6 (s, C), 129.3 (s, CH), 128.7 (s, CH), 128.66 (s, CH), 128.3 (s, CH), 128.1 (s, CH), 125.9 (s, CH), 123.9 (s, CH), 120.4 (s, CH), 76.0 (s, C), 60.3 (s, OCH<sub>3</sub>), 45.9 (d, *J*<sub>CP</sub> = 7.5 Hz, CH), 31.6 (d, *J*<sub>CP</sub> = 11.3 Hz, CH<sub>2</sub>), 28.4 (d, *J*<sub>CP</sub> = 4.5 Hz, CH<sub>2</sub>). HRMS (ESI): *m/z* calcd for C<sub>29</sub>H<sub>23</sub>MoNO<sub>8</sub>P (M+H)<sup>+</sup> 642.0210, found 642.0210.

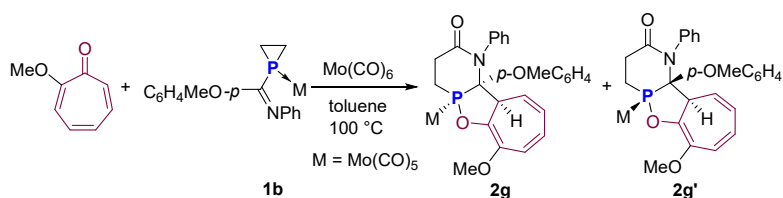

Under the atmosphere of N<sub>2</sub>, a solution of **1b** (152.09 mg, 0.30 mmol), Mo(CO)<sub>6</sub> (79.20 mg, 0.30 mmol) and 2-methoxytropone (81.63 mg, 0.60 mmol) in toluene (6 mL) were stirred at 100 °C for 4 h in a heavy wall pressure tube (75 mL). The precipitate was filtered off, and the filtrate was concentrated under vacuum. The resulting brown oil was further purified by thin layer chromatography (petroleum ether/dichloromethane = 1:7), yielding **2g** (36.24 mg, 0.05 mmol, 18%, R<sub>f</sub> = 0.41) as yellowish solid and **2g'** (24.16 mg, 0.04 mmol, 12%, R<sub>f</sub> = 0.32) as yellow solid.

**2g**: m.p. > 280 °C (dec). <sup>31</sup>P NMR (121 MHz, CDCl<sub>3</sub>) δ: 164.4 (s). <sup>1</sup>H NMR (300 MHz, CDCl<sub>3</sub>) δ: 7.18 – 7.13 (m, 3H, CH), 7.07 – 7.00 (m, 4H, CH), 6.74 – 6.61 (m, 4H, CH), 6.42 – 6.37 (m, 1H, CH), 5.85 – 5.81 (m, 1H, CH), 3.80 (s, 3H, OCH<sub>3</sub>), 3.66 (s, 3H, OCH<sub>3</sub>), 3.49 – 3.07 (m, 4H, CH<sub>2</sub>, CH), 2.26 – 2.21 (m, 1H, CH<sub>2</sub>). <sup>13</sup>C NMR (75 MHz, CDCl<sub>3</sub>) δ: 207.6 (d, *J*<sub>CP</sub> = 33.8 Hz, CO *trans*), 203.5 (d, *J*<sub>CP</sub> = 9.8 Hz, CO *cis*), 170.2 (d, *J*<sub>CP</sub> = 3.8 Hz, CO), 159.5 (d, *J*<sub>CP</sub> = 2.3 Hz, C), 139.5 (d, *J*<sub>CP</sub> = 3.0 Hz, C), 136.6 (d, *J*<sub>CP</sub> = 4.5 Hz, C), 134.6 (d, *J*<sub>CP</sub> = 9.8 Hz, C), 130.3 (d, *J*<sub>CP</sub> = 0.8 Hz, C), 128.5 (s, CH two kinds of carbon signals overlapping), 128.1 (s, CH, two kinds of carbon signals overlapping), 128.08 (d, *J*<sub>CP</sub> = 3.8 Hz, CH), 127.0 (s, CH), 126.1 (s,

CH), 123.7 (s, CH), 113.8 (s, CH), 75.2 (d,  $J_{CP}$  = 10.5 Hz, C), 59.8 (s, OCH<sub>3</sub>), 55.2 (s, OCH<sub>3</sub>), 48.2 (d,  $J_{CP}$  = 3.8 Hz, CH), 28.6 (d,  $J_{CP}$  = 3.8 Hz, CH<sub>2</sub>), 25.7 (d,  $J_{CP}$  = 5.3 Hz, CH<sub>2</sub>). **HRMS (ESI):** m/z calcd for C<sub>30</sub>H<sub>25</sub>MoNO<sub>9</sub>P (M+H)<sup>+</sup> 672.0316, found 672.0314.

**2g'**: m.p. > 280 °C (dec). <sup>31</sup>P NMR (121 MHz, CDCl<sub>3</sub>) δ: 173.2 (s). <sup>1</sup>H NMR (300 MHz, CDCl<sub>3</sub>) δ: 7.21 – 7.10 (m, 3H, CH), 7.03 – 7.00 (m, 2H, CH), 6.88 – 6.85 (m, 2H, CH), 6.67 – 6.63 (m, 1H, CH), 6.57 – 6.51 (m, 1H, CH), 6.40 (bs, 2H, CH), 6.12 – 6.07 (m, 1H, CH), 5.44 (dd,  $J$  = 9.0,  $J$  = 6.0 Hz, 1H, CH), 3.82 (s, 3H, OCH<sub>3</sub>), 3.67 (s, 3H, OCH<sub>3</sub>), 3.28 – 2.88 (m, 5H, 2CH<sub>2</sub>, CH). <sup>13</sup>C NMR (75 MHz, CDCl<sub>3</sub>) δ: 207.7 (d,  $J_{CP}$  = 32.3 Hz, CO *trans*), 203.6 (d,  $J_{CP}$  = 9.8 Hz, CO *cis*), 168.9 (d,  $J_{CP}$  = 5.3 Hz, CO), 160.1 (s, C), 137.8 (s, C), 136.8 (d,  $J_{CP}$  = 6.0 Hz, C), 132.5 (d,  $J_{CP}$  = 7.5 Hz, CH), 130.7 (s, CH), 130.0 (s, C), 128.7 (s, CH), 128.3 (s, CH), 128.0 (s, CH), 127.3 (d,  $J_{CP}$  = 11.3 Hz, C), 126.1 (s, CH), 123.9 (s, CH), 120.9 (s, CH), 114.0 (s, CH), 75.6 (s, C), 60.3 (s, OCH<sub>3</sub>), 55.5 (s, OCH<sub>3</sub>), 46.2 (d,  $J_{CP}$  = 6.8 Hz, CH), 31.4 (d,  $J_{CP}$  = 11.3 Hz, CH<sub>2</sub>), 28.3 (d,  $J_{CP}$  = 4.5 Hz, CH<sub>2</sub>). **HRMS (ESI):** m/z calcd for C<sub>30</sub>H<sub>25</sub>MoNO<sub>9</sub>P (M+H)<sup>+</sup> 672.0316, found 672.0319.

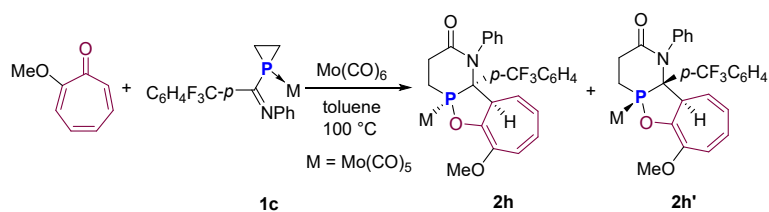

Under the atmosphere of N<sub>2</sub>, a solution of **1c** (152.09 mg, 0.30 mmol), Mo(CO)<sub>6</sub> (79.20 mg, 0.30 mmol) and 2-methoxytropone (81.63 mg, 0.60 mmol) in toluene (6 mL) were stirred at 100 °C for 4 h in a heavy wall pressure tube (75 mL). The precipitate was filtered off, and the filtrate was concentrated under vacuum. The resulting brown oil was further purified by thin layer chromatography (petroleum ether/ ethyl acetate = 3:1), yielding **2h** (51.05 mg, 0.07 mmol, 24%, R<sub>f</sub> = 0.60) as yellow oil and **2h'** (8.51 mg, 0.01 mmol, 4%, R<sub>f</sub> = 0.30) as yellow oil.

**2h:** <sup>31</sup>P NMR (121 MHz, CDCl<sub>3</sub>) δ: 165.1 (s). <sup>1</sup>H NMR (300 MHz, CDCl<sub>3</sub>) δ: 7.45 – 7.43 (m, 4H, CH), 7.19 – 7.14 (m, 2H, CH), 7.08 – 7.00 (m, 3H, CH), 6.77 – 6.64 (m, 2H, CH), 6.44 – 6.39 (m, 1H, CH), 5.86 – 5.81 (m, 1H, CH), 3.80 (s, 3H, OCH<sub>3</sub>), 3.55

– 3.11 (m, 4H, CH<sub>2</sub>, CH), 2.28 (d, *J* = 12.3 Hz, 1H, CH<sub>2</sub>). <sup>13</sup>C NMR (75 MHz, CDCl<sub>3</sub>) δ: 206.9 (d, *J*<sub>CP</sub> = 34.5 Hz, CO *trans*), 203.2 (d, *J*<sub>CP</sub> = 9.8 Hz, CO *cis*), 169.9 (d, *J*<sub>CP</sub> = 4.5 Hz, CO), 143.0 (s, C), 139.3 (d, *J*<sub>CP</sub> = 3.8 Hz, C), 136.9 (d, *J*<sub>CP</sub> = 4.5 Hz, C), 134.2 (d, *J*<sub>CP</sub> = 10.5 Hz, C), 130.6 (qd, *J*<sub>CF</sub> = 32.3 Hz, *J*<sub>CP</sub> = 3.0 Hz, C), 128.7 (s, CH), 128.4 (s, CH), 127.92 (d, *J*<sub>CP</sub> = 8.3 Hz, CH), 127.87 (s, CH, two kinds of carbon signals overlapping), 127.3 (s, CH), 126.4 (s, CH), 125.6 – 125.4 (m, CH), 123.5 (q, *J*<sub>CF</sub> = 270.8 Hz, CF<sub>3</sub>), 123.2 (s, CH), 75.9 (d, *J*<sub>CP</sub> = 6.8 Hz, C), 59.8 (s, OCH<sub>3</sub>), 48.3 (d, *J*<sub>CP</sub> = 3.0 Hz, CH), 28.5 (d, *J*<sub>CP</sub> = 3.0 Hz, CH<sub>2</sub>), 26.0 (d, *J*<sub>CP</sub> = 6.0 Hz, CH<sub>2</sub>). HRMS (ESI): *m/z* calcd for C<sub>30</sub>H<sub>22</sub>MoNO<sub>8</sub>PF<sub>3</sub> (M+H)<sup>+</sup> 710.0084, found 710.0087.

**2h'**: <sup>31</sup>P NMR (121 MHz, CDCl<sub>3</sub>) δ: 172.1 (s). <sup>1</sup>H NMR (300 MHz, CDCl<sub>3</sub>) δ: 7.63 (d, *J* = 8.1 Hz, 2H, CH), 7.29 (d, *J* = 8.1 Hz, 2H, CH), 7.21 – 7.12 (m, 3H, CH), 6.66 – 6.53 (m, 2H, CH), 6.41 (d, *J* = 2.4 Hz, 2H, CH), 6.11 (dd, *J* = 8.4, *J* = 5.7 Hz, 1H, CH), 5.26 (dd, *J* = 9.0, *J* = 5.7 Hz, 1H, CH), 3.69 (s, 1H, OCH<sub>3</sub>), 3.32 – 2.89 (m, 5H, CH<sub>2</sub>, CH). <sup>13</sup>C NMR (75 MHz, CDCl<sub>3</sub>) δ: 207.1 (d, *J*<sub>CP</sub> = 32.3 Hz, CO *trans*), 203.4 (d, *J*<sub>CP</sub> = 9.0 Hz, CO *cis*), 169.0 (d, *J*<sub>CP</sub> = 5.3 Hz, CO), 139.7 (d, *J*<sub>CP</sub> = 9.8 Hz, C), 137.6 (d, *J*<sub>CP</sub> = 0.8 Hz, C), 137.4 (d, *J*<sub>CP</sub> = 6.0 Hz, C), 131.6 (s, CH), 131.5 (s, CH), 131.4 (qd, *J*<sub>CF</sub> = 33.0 Hz, *J*<sub>CP</sub> = 0.8 Hz, C), 130.6 (s, CH), 129.0 (s, CH), 128.8 (s, C), 128.3 (d, *J*<sub>CP</sub> = 2.3 Hz, CH), 125.5 (d, *J*<sub>CP</sub> = 3.8 Hz, CH), 125.4 (s, CH), 124.2 (s, CH), 123.5 (q, *J*<sub>CF</sub> = 271.5 Hz, CF<sub>3</sub>), 118.6 (s, CH), 75.7 (d, *J*<sub>CP</sub> = 0.8 Hz, C), 60.2 (s, OCH<sub>3</sub>), 45.8 (d, *J*<sub>CP</sub> = 6.8 Hz, CH), 31.5 (d, *J*<sub>CP</sub> = 11.3 Hz, CH<sub>2</sub>), 28.2 (d, *J*<sub>CP</sub> = 3.8 Hz, CH<sub>2</sub>). HRMS (ESI): *m/z* calcd for C<sub>30</sub>H<sub>22</sub>MoNO<sub>8</sub>PF<sub>3</sub> (M+H)<sup>+</sup> 710.0084, found 710.0083.

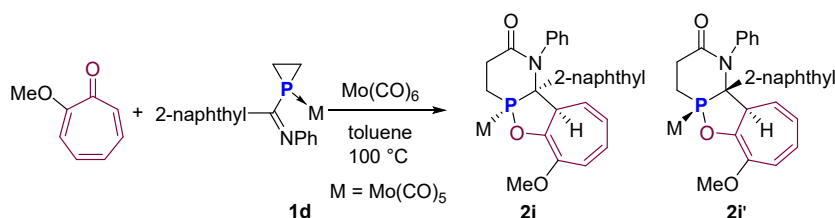

Under the atmosphere of N<sub>2</sub>, a solution of **1d** (158.09 mg, 0.30 mmol), Mo(CO)<sub>6</sub> (79.20 mg, 0.30 mmol) and 2-methoxytropone (81.63 mg, 0.60 mmol) in toluene (6 mL) were stirred at 100 °C for 4 h in a heavy wall pressure tube (75 mL). The precipitate was filtered off, and the filtrate was concentrated under vacuum. The

resulting brown oil was further purified by thin layer chromatography (petroleum ether/ ethyl acetate = 4:1), yielding **2i** (43.53 mg, 0.06 mmol, 21%,  $R_f = 0.50$ ) as yellow oil and **2i'** (31.10 mg, 0.05 mmol, 15%,  $R_f = 0.28$ ) as yellow oil.

**2i:**  $^{31}\text{P}$  NMR (121 MHz,  $\text{CDCl}_3$ )  $\delta$ : 160.8 (s).  $^1\text{H}$  NMR (300 MHz,  $\text{CDCl}_3$ )  $\delta$ : 7.67 – 7.65 (m, 3H, CH), 7.41 – 7.38 (m, 4H, CH), 7.11 – 7.09 (m, 4H, CH), 6.97 – 6.95 (m, 1H, CH), 6.81 – 6.77 (m, 1H, CH), 6.71 – 6.65 (m, 1H, CH), 6.45 – 6.40 (m, 1H, CH), 5.90 – 5.85 (m, 1H, CH), 3.84 (s, 3H,  $\text{OCH}_3$ ), 3.54 – 3.27 (m, 4H,  $\text{CH}_2$ , CH), 2.28 (d,  $J = 13.5$  Hz, 1H,  $\text{CH}_2$ ).  $^{13}\text{C}$  NMR (75 MHz,  $\text{CDCl}_3$ )  $\delta$ : 207.4 (d,  $J_{\text{CP}} = 33.8$  Hz, CO *trans*), 203.3 (d,  $J_{\text{CP}} = 9.8$  Hz, CO *cis*), 170.2 (d,  $J_{\text{CP}} = 4.5$  Hz, CO), 139.6 (d,  $J_{\text{CP}} = 3.8$  Hz, C), 136.9 (d,  $J_{\text{CP}} = 3.8$  Hz, C), 136.1 (d,  $J_{\text{CP}} = 0.8$  Hz, C), 134.5 – 134.3 (m, C), 132.9 (d,  $J_{\text{CP}} = 1.5$  Hz, C, two kinds of carbon signals overlapping), 128.5 (s, CH, three kinds of carbon signals overlapping), 128.2 (s, CH), 128.1 (s, CH, four kinds of carbon signals overlapping), 127.4 (s, CH), 127.1 (s, CH), 126.9 (s, CH), 126.6 (s, CH), 126.2 (s, CH), 123.3 – 123.2 (m, CH), 76.0 (d,  $J_{\text{CP}} = 8.3$  Hz, C), 59.8 (s,  $\text{OCH}_3$ ), 48.3 (d,  $J_{\text{CP}} = 2.3$  Hz, CH), 28.6 (d,  $J_{\text{CP}} = 3.8$  Hz,  $\text{CH}_2$ ), 25.9 (d,  $J_{\text{CP}} = 6.0$  Hz,  $\text{CH}_2$ ).  
**HRMS (ESI):**  $m/z$  calcd for  $\text{C}_{33}\text{H}_{25}\text{MoNO}_8\text{P}$  ( $\text{M}+\text{H}$ ) $^+$  692.0366, found 692.0366.

**2i':**  $^{31}\text{P}$  NMR (121 MHz,  $\text{CDCl}_3$ )  $\delta$ : 173.0 (s).  $^1\text{H}$  NMR (300 MHz,  $\text{CDCl}_3$ )  $\delta$ : 7.86 – 7.82 (m, 2H, CH), 7.78 – 7.75 (m, 1H, CH), 7.70 (s, 1H, CH), 7.59 – 7.51 (m, 2H, CH), 7.19 – 7.07 (m, 4H, CH), 6.68 – 6.64 (m, 1H, CH), 6.59 – 6.54 (m, 1H, CH), 6.44 (bs, 2H, CH), 6.10 (dd,  $J = 9.0$ ,  $J = 5.4$  Hz, 1H, CH), 5.44 (dd,  $J = 9.0$ ,  $J = 5.7$  Hz, 1H, CH), 3.69 (s, 3H,  $\text{OCH}_3$ ), 3.33 – 3.02 (m, 5H,  $\text{CH}_2$ , CH).  $^{13}\text{C}$  NMR (75 MHz,  $\text{CDCl}_3$ )  $\delta$ : 207.5 (d,  $J_{\text{CP}} = 32.3$  Hz, CO *trans*), 203.6 (d,  $J_{\text{CP}} = 9.8$  Hz, CO *cis*), 169.2 (d,  $J_{\text{CP}} = 5.3$  Hz, CO), 137.8 (d,  $J_{\text{CP}} = 0.8$  Hz, C), 137.0 (d,  $J_{\text{CP}} = 6.0$  Hz, C), 132.9 (s, C), 132.8 (d,  $J_{\text{CP}} = 11.3$  Hz, C), 132.6 (s, C), 131.4 (s, CH), 131.3 (s, CH), 130.7 (s, CH), 129.8 (s, C), 128.8 (s, CH), 128.5 (s, CH), 128.4 (s, CH), 128.1 (d,  $J_{\text{CP}} = 3.0$  Hz, CH), 127.75 (d,  $J_{\text{CP}} = 3.8$  Hz, CH), 127.7 (d,  $J_{\text{CP}} = 3.8$  Hz, CH), 127.5 (s, CH), 127.1 (s, CH), 125.9 (s, CH), 124.1 (s, CH), 120.6 (s, CH), 76.1 (s, C), 60.2 (s,  $\text{OCH}_3$ ), 46.2 (d,  $J_{\text{CP}} = 6.8$  Hz, CH), 31.7 (d,  $J_{\text{CP}} = 12.0$  Hz,  $\text{CH}_2$ ), 28.6 (d,  $J_{\text{CP}} = 3.8$  Hz,  $\text{CH}_2$ ).  
**HRMS (ESI):**  $m/z$  calcd for  $\text{C}_{33}\text{H}_{25}\text{MoNO}_8\text{P}$  ( $\text{M}+\text{H}$ ) $^+$  692.0366, found 692.0367.

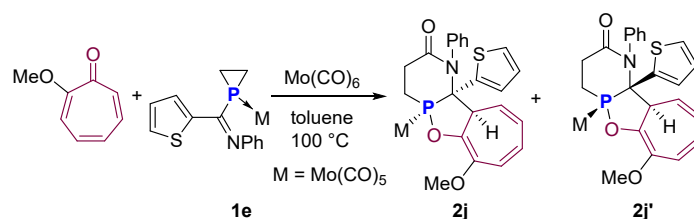

Under the atmosphere of  $\text{N}_2$ , a solution of **1e** (144.88 mg, 0.30 mmol),  $\text{Mo(CO)}_6$  (79.20 mg, 0.30 mmol) and 2-methoxytropone (81.63 mg, 0.60 mmol) in toluene (6 mL) were stirred at 100 °C for 4 h in a heavy wall pressure tube (75 mL). The precipitate was filtered off, and the filtrate was concentrated under vacuum. The resulting brown oil was further purified by thin layer chromatography (petroleum ether/ ethyl acetate = 2:1), yielding **2j** (52.40 mg, 0.08 mmol, 27%,  $R_f = 0.60$ ) as yellow oil and **2j'** (15.53 mg, 0.02 mmol, 8%,  $R_f = 0.40$ ) as yellow oil.

**2j**:  $^{31}\text{P}$  NMR (121 MHz,  $\text{CDCl}_3$ )  $\delta$ : 165.1 (s).  $^1\text{H}$  NMR (300 MHz,  $\text{CDCl}_3$ )  $\delta$ : 7.22 – 7.17 (m, 2H, CH), 7.13 – 7.03 (m, 4H, CH), 6.86 – 6.76 (m, 2H, CH), 6.72 – 6.59 (m, 2H, CH), 6.39 – 6.35 (m, 1H, CH), 5.79 – 5.74 (m, 1H, CH), 3.82 (s, 3H,  $\text{OCH}_3$ ), 3.52 – 3.15 (m, 4H,  $\text{CH}_2$ , CH), 2.27 – 2.23 (m, 1H,  $\text{CH}_2$ ).  $^{13}\text{C}$  NMR (75 MHz,  $\text{CDCl}_3$ )  $\delta$ : 207.4 (d,  $J_{\text{CP}} = 34.5$  Hz, CO *trans*), 203.4 (d,  $J_{\text{CP}} = 9.8$  Hz, CO *cis*), 169.6 (d,  $J_{\text{CP}} = 3.8$  Hz, CO), 142.7 (s, C), 139.5 (d,  $J_{\text{CP}} = 3.8$  Hz, C), 137.0 (d,  $J_{\text{CP}} = 4.5$  Hz, C), 133.7 (d,  $J_{\text{CP}} = 9.8$  Hz, C), 128.6 (d,  $J_{\text{CP}} = 6.0$  Hz, CH), 128.5 (s, CH), 128.4 (s, CH), 128.2 (s, CH), 128.1 (s, CH), 127.3 (s, CH), 126.9 (d,  $J_{\text{CP}} = 2.3$  Hz, CH), 126.2 (s, CH), 126.1 (s, CH), 123.4 (s, CH), 74.3 (d,  $J_{\text{CP}} = 12.0$  Hz, C), 59.7 (s,  $\text{OCH}_3$ ), 50.8 (d,  $J_{\text{CP}} = 3.8$  Hz, CH), 28.6 (d,  $J_{\text{CP}} = 3.0$  Hz,  $\text{CH}_2$ ), 25.6 (d,  $J_{\text{CP}} = 6.0$  Hz,  $\text{CH}_2$ ). **HRMS (ESI)**:  $m/z$  calcd for  $\text{C}_{27}\text{H}_{21}\text{MoNO}_8\text{PS}$  ( $\text{M}+\text{H}$ ) $^+$  647.9774, found 647.9778.

**2j'**:  $^{31}\text{P}$  NMR (121 MHz,  $\text{CDCl}_3$ )  $\delta$ : 174.4 (s).  $^1\text{H}$  NMR (300 MHz,  $\text{CDCl}_3$ )  $\delta$ : 7.50 (dd,  $J = 5.1$ ,  $J = 0.9$  Hz, 1H, CH), 7.23 – 7.17 (m, 3H, CH), 6.99 – 6.96 (m, 1H, CH), 6.79 – 6.78 (m, 1H, CH), 6.67 – 6.50 (m, 4H, CH), 6.15 – 6.09 (m, 1H, CH), 5.72 (dd,  $J = 9.3$ ,  $J = 5.7$  Hz, 1H, CH), 3.66 (s, 3H,  $\text{OCH}_3$ ), 3.24 – 2.85 (m, 5H,  $\text{CH}_2$ , CH).  $^{13}\text{C}$  NMR (75 MHz,  $\text{CDCl}_3$ )  $\delta$ : 207.5 (d,  $J_{\text{CP}} = 32.3$  Hz, CO *trans*), 203.5 (d,  $J_{\text{CP}} = 9.8$  Hz, CO *cis*), 169.0 (d,  $J_{\text{CP}} = 4.5$  Hz, CO), 137.8 (d,  $J_{\text{CP}} = 13.5$  Hz, C), 137.2 (s, C), 136.6 (d,  $J_{\text{CP}} = 6.0$  Hz, C), 131.9 (d,  $J_{\text{CP}} = 6.8$  Hz, CH), 130.2 (s, C), 130.1 (s, CH), 128.8 (s, CH), 128.6 (s, CH), 128.3 (s, CH), 127.7 (s, CH), 126.9 (s, CH), 126.7 (s, CH), 124.3

(s, CH), 121.6 (s, CH), 72.4 (s, C), 60.3 (s, OCH<sub>3</sub>), 47.6 (d,  $J_{CP}$  = 6.8 Hz, CH), 31.3 (d,  $J_{CP}$  = 12.0 Hz, CH<sub>2</sub>), 28.3 (d,  $J_{CP}$  = 4.5 Hz, CH<sub>2</sub>). **HRMS (ESI):**  $m/z$  calcd for C<sub>27</sub>H<sub>21</sub>MoNO<sub>8</sub>PS (M+H)<sup>+</sup> 647.9774, found 647.9772.

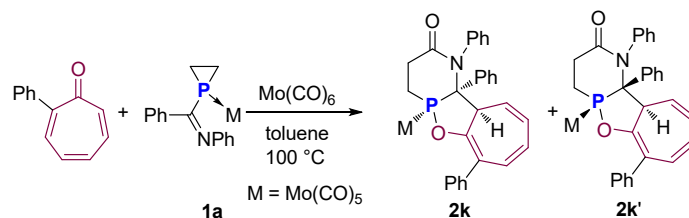

Under the atmosphere of N<sub>2</sub>, a solution of **1a** (143.09 mg, 0.30 mmol), Mo(CO)<sub>6</sub> (79.20 mg, 0.30 mmol) and 2-phenyltropone (109.24 g, 0.60 mmol) in toluene (6 mL) were stirred at 100 °C for 4 h in a heavy wall pressure tube (75 mL). The precipitate was filtered off, and the filtrate was concentrated under vacuum. The resulting brown oil was further purified by thin layer chromatography (petroleum ether/ethyl acetate = 4:1), yielding **2k** (96.87 mg, 0.14 mmol, 47%, R<sub>f</sub> = 0.41) as brown solid and traces of **2k'**.

**2k: m.p. 135.9 – 136.5 °C.** <sup>31</sup>P NMR (121 MHz, CDCl<sub>3</sub>) δ: 164.4. <sup>1</sup>H NMR (300 MHz, CDCl<sub>3</sub>) δ: 7.49 – 7.29 (m, 6H, CH), 7.21 – 7.13 (m, 5H, CH), 7.08 – 6.94 (m, 5H, CH), 6.86 – 6.81 (m, 1H, CH), 6.58 – 6.54 (m, 1H, CH), 5.93 – 5.88 (m, 1H, CH), 3.44 – 3.21 (m, 4H, CH<sub>2</sub>, CH), 2.24 – 2.18 (m, 1H, CH<sub>2</sub>). <sup>13</sup>C NMR (75 MHz, CDCl<sub>3</sub>) δ: 207.6 (d,  $J_{CP}$  = 34.5 Hz, CO *trans*), 203.3 (d,  $J_{CP}$  = 9.8 Hz, CO *cis*), 170.0 (d,  $J_{CP}$  = 4.5 Hz, CO), 144.4 (d,  $J_{CP}$  = 10.5 Hz, C), 139.6 (d,  $J_{CP}$  = 3.8 Hz, C), 138.7 (d,  $J_{CP}$  = 1.5 Hz, C), 136.2 (s, C), 133.4 (s, CH), 129.6 (s, CH, two kinds of carbon signals overlapping), 128.72 (s, CH), 128.68 (s, CH), 128.5 (s, CH), 128.4 (s, CH), 128.2 (s, CH), 128.2 (s, CH), 127.4 (s, CH), 127.1 (s, CH), 127.0 (s, CH), 122.9 (s, CH), 115.3 (d,  $J_{CP}$  = 3.8 Hz, CH), 75.5 (d,  $J_{CP}$  = 8.3 Hz, C), 50.9 (d,  $J_{CP}$  = 3.0 Hz, CH), 28.4 (d,  $J_{CP}$  = 3.0 Hz, CH<sub>2</sub>), 25.9 (d,  $J_{CP}$  = 6.0 Hz, CH<sub>2</sub>). **HRMS (ESI):**  $m/z$  calcd for C<sub>34</sub>H<sub>25</sub>MoNO<sub>7</sub>P (M+H)<sup>+</sup> 688.0418, found 688.0503.

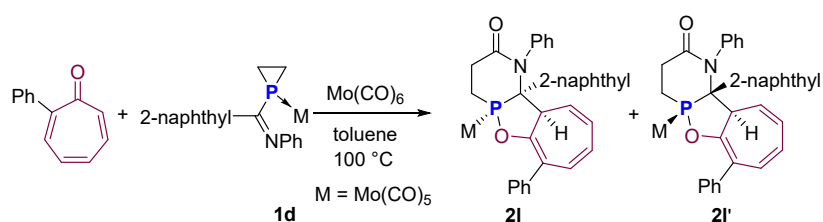



Under the atmosphere of N<sub>2</sub>, a solution of **1d** (158.09 mg, 0.30 mmol), Mo(CO)<sub>6</sub> (79.20 mg, 0.30 mmol) and 2-phenyltropone (109.24 g, 0.60 mmol) in toluene (6 mL) were stirred at 100 °C for 4 h in a heavy wall pressure tube (75 mL). The precipitate was filtered off, and the filtrate was concentrated under vacuum. The resulting brown oil was further purified by thin layer chromatography (petroleum ether/ethyl acetate = 4:1), yielding **2l** (101.72 mg, 0.14 mmol, 46%, R<sub>f</sub> = 0.43) as yellow oil and traces of **2l'**.

**2l:** <sup>31</sup>P NMR (121 MHz, CDCl<sub>3</sub>) δ: 160.7. <sup>1</sup>H NMR (300 MHz, CDCl<sub>3</sub>) δ: 7.72 – 7.66 (m, 4H, CH), 7.51 – 7.24 (m, 8H, CH), 7.17 – 6.85 (m, 7H, CH), 6.61 – 6.56 (m, 1H, CH), 5.97 – 5.93 (m, 1H, CH), 3.50 – 3.17 (m, 4H, CH<sub>2</sub>, CH), 2.28 – 2.15 (m, 1H, CH<sub>2</sub>). <sup>13</sup>C NMR (75 MHz, CDCl<sub>3</sub>) δ: 207.5 (d, J<sub>CP</sub> = 34.5 Hz, CO *trans*), 203.3 (d, J<sub>CP</sub> = 9.8 Hz, CO *cis*), 170.1 (d, J<sub>CP</sub> = 3.8 Hz, CO), 144.4 (d, J<sub>CP</sub> = 9.8 Hz, C), 139.7 (d, J<sub>CP</sub> = 2.3 Hz, C), 136.3 (s, C, two kinds of carbon signals overlapping), 133.5 (s, CH), 133.00 (s, C), 132.98 (s, C), 129.6 (s, CH, two kinds of carbon signals overlapping), 128.6 (s, CH, three kinds of carbon signals overlapping), 128.3 (s, CH, three kinds of carbon signals overlapping), 128.2 (s, CH), 127.5 (s, CH), 127.4 (s, CH), 127.2 (s, CH), 127.1 (s, CH), 127.0 (s, CH), 126.7 (s, CH), 123.0 (s, CH), 115.48 (d, J<sub>CP</sub> = 3.8 Hz, C), 75.8 (d, J<sub>CP</sub> = 8.3 Hz, C), 51.3 (d, J<sub>CP</sub> = 3.8 Hz, CH), 28.5 (d, J<sub>CP</sub> = 3.0 Hz, CH<sub>2</sub>), 26.0 (d, J<sub>CP</sub> = 5.3 Hz, CH<sub>2</sub>). **HRMS (ESI):** m/z calcd for C<sub>38</sub>H<sub>27</sub>MoNO<sub>7</sub>P (M+H)<sup>+</sup> 738.0574, found 738.0586.

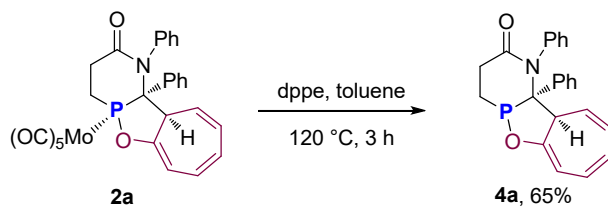

Under the atmosphere of N<sub>2</sub>, a solution of **2a** (61.10 mg, 0.10 mmol) and dppe (39.81 mg, 0.10 mmol) in toluene (2 mL) were stirred at 120 °C for 3 h in a heavy wall pressure tube (75 mL). The resulting brown solution was purified by thin layer chromatography (petroleum ether/ethyl acetate = 1:2), yielding **4a** (24.30 mg, 0.07 mmol, 65%, R<sub>f</sub> = 0.50) as yellow oil.

**4a:** <sup>31</sup>P NMR (121 MHz, CDCl<sub>3</sub>) δ: 118.3 (s). <sup>1</sup>H NMR (300 MHz, CDCl<sub>3</sub>) δ: 7.19 –

6.98 (m, 10H, CH), 6.74 – 6.59 (m, 2H, CH), 6.48 – 6.43 (m, 1H, CH), 5.94 (d,  $J = 6.0$  Hz, 1H, CH), 5.75 (dd,  $J = 9.0, 5.1$  Hz, 1H, CH), 3.24 – 2.89 (m, 4H, CH<sub>2</sub>, CH), 1.96 – 1.87 (m, 1H, CH<sub>2</sub>). <sup>13</sup>C NMR (75 MHz, CDCl<sub>3</sub>)  $\delta$ : 170.6 (s, CO), 151.8 (d,  $J_{CP} = 11.3$  Hz, C), 140.3 (d,  $J_{CP} = 11.3$  Hz, C), 139.8 (s, C), 130.34 (s, CH), 130.33 (s, CH), 128.5 (s, CH), 128.4 (s, CH), 128.3 (s, CH), 127.8 (s, CH), 127.72 (s, CH), 126.99 (s, CH), 126.4 (s, CH), 121.3 (s, CH), 102.1 (s, CH), 74.3 (d,  $J_{CP} = 21.8$  Hz, C), 47.0 (s, CH), 27.1 (d,  $J_{CP} = 12.0$  Hz, CH<sub>2</sub>), 18.0 (d,  $J_{CP} = 30.0$  Hz, CH<sub>2</sub>). **HRMS (ESI)**:  $m/z$  calcd for C<sub>23</sub>H<sub>21</sub>NO<sub>2</sub>P (M+H)<sup>+</sup> 374.1305, found 374.1280.

## References

- [1] Y. Hao, C. Zhang, Y. Mei, R. Tian, Z. Duan and F. Mathey, The chemistry of parent phosphiranide in the coordination sphere of tungsten, *Dalton Trans.*, 2016, **45**, 8284–8290.
- [2] (a) J. Li, M. Cui, R. Tian, Z. Duan and F. Mathey, Cycloadditions of 1-iminylphosphirane complexes with allenes, *Chin. Chem. Lett.*, 2021, **32**, 449–452.  
(b) Y. Xu, M. Wang, D. Wei, R. Tian, Z. Duan and F. Mathey, An approach to 7-aza-1-phosphanorbornane complexes: strain promoted rearrangement of 1-iminylphosphirane complexes and cycloaddition with olefins, *Dalton Trans.*, 2019, **48**, 5523–5526.
- [3] A. Khrizman, R. D. Slack, R. C. Remsing, S. Little, V. Yardley and G. Moyna, Synthesis and In *Vitro* Protozoocidal Evaluation of Novel Diazabicyclic Tropolone Derivatives, *Arch. Pharm. Chem. Life Sci.*, 2007, **340**, 569–576.
- [4] S. N. Ononye, M. D. VanHeyst, E. Z. Oblak, W. Zhou, M. Ammar, A. C. Anderson and D. L. Wright, Tropolones As Lead-Like Natural Products: The Development of Potent and Selective Histone Deacetylase Inhibitors, *ACS Med. Chem. Lett.*, 2013, **4**, 757–761.

## X-ray crystallographic data of compound 2a

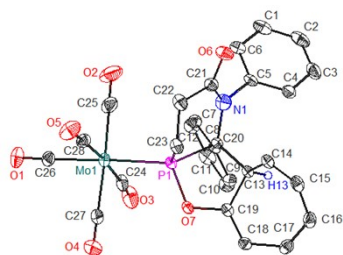

**Table 1** Crystal data and structure refinement for 2a (CCDC: 1970636).

|                                             |                                                               |
|---------------------------------------------|---------------------------------------------------------------|
| Identification code                         | <b>2a</b>                                                     |
| Empirical formula                           | C <sub>28</sub> H <sub>20</sub> MoNO <sub>7</sub> P           |
| Formula weight                              | 609.36                                                        |
| Temperature/K                               | 300.19                                                        |
| Crystal system                              | monoclinic                                                    |
| Space group                                 | P2 <sub>1</sub> /n                                            |
| a/Å                                         | 8.9608(12)                                                    |
| b/Å                                         | 13.6919(17)                                                   |
| c/Å                                         | 21.739(3)                                                     |
| α/°                                         | 90                                                            |
| β/°                                         | 101.338(4)                                                    |
| γ/°                                         | 90                                                            |
| Volume/Å <sup>3</sup>                       | 2615.1(6)                                                     |
| Z                                           | 0                                                             |
| ρ <sub>calc</sub> /g/cm <sup>3</sup>        | 1.548                                                         |
| μ/mm <sup>-1</sup>                          | 0.611                                                         |
| F(000)                                      | 1232.0                                                        |
| Crystal size/mm <sup>3</sup>                | 0.5 × 0.5 × 0.4                                               |
| Radiation                                   | MoKα (λ = 0.71073)                                            |
| 2θ range for data collection/°              | 4.654 to 55.174                                               |
| Index ranges                                | -11 ≤ h ≤ 11, -17 ≤ k ≤ 17, -27 ≤ l ≤ 28                      |
| Reflections collected                       | 32995                                                         |
| Independent reflections                     | 6048 [R <sub>int</sub> = 0.0666, R <sub>sigma</sub> = 0.0493] |
| Data/restraints/parameters                  | 6048/0/415                                                    |
| Goodness-of-fit on F <sup>2</sup>           | 1.044                                                         |
| Final R indexes [I ≥ 2σ (I)]                | R <sub>1</sub> = 0.0405, wR <sub>2</sub> = 0.0926             |
| Final R indexes [all data]                  | R <sub>1</sub> = 0.0619, wR <sub>2</sub> = 0.1071             |
| Largest diff. peak/hole / e Å <sup>-3</sup> | 0.61/-0.68                                                    |

**Table 2** Bond Lengths for 2a.

| Atom | Atom | Length/Å  | Atom | Atom | Length/Å |
|------|------|-----------|------|------|----------|
| Mo1  | P1   | 2.4731(8) | C2   | C3   | 1.370(6) |

| Atom | Atom | Length/Å | Atom | Atom | Length/Å |
|------|------|----------|------|------|----------|
| Mo1  | C24  | 2.055(4) | C3   | C4   | 1.391(5) |
| Mo1  | C25  | 2.038(4) | C4   | C5   | 1.372(4) |
| Mo1  | C26  | 2.028(3) | C5   | C6   | 1.381(4) |
| Mo1  | C27  | 2.058(4) | C7   | C8   | 1.395(4) |
| Mo1  | C28  | 2.033(4) | C7   | C12  | 1.380(4) |
| P1   | O7   | 1.638(2) | C8   | C9   | 1.389(4) |
| P1   | C20  | 1.888(3) | C8   | C20  | 1.532(4) |
| P1   | C23  | 1.806(3) | C9   | C10  | 1.382(4) |
| O1   | C26  | 1.116(4) | C10  | C11  | 1.374(5) |
| O2   | C25  | 1.134(4) | C11  | C12  | 1.375(5) |
| O3   | C24  | 1.131(4) | C13  | C14  | 1.503(4) |
| O4   | C27  | 1.128(4) | C13  | C19  | 1.508(4) |
| O5   | C28  | 1.134(4) | C13  | C20  | 1.566(3) |
| O6   | C21  | 1.218(4) | C14  | C15  | 1.338(4) |
| O7   | C19  | 1.390(3) | C15  | C16  | 1.440(5) |
| N1   | C5   | 1.450(3) | C16  | C17  | 1.342(5) |
| N1   | C20  | 1.478(3) | C17  | C18  | 1.446(4) |
| N1   | C21  | 1.387(4) | C18  | C19  | 1.316(4) |
| C1   | C2   | 1.367(6) | C21  | C22  | 1.502(4) |
| C1   | C6   | 1.376(5) | C22  | C23  | 1.523(5) |

**Table 3 Bond Angles for 2a.**

| Atom | Atom | Atom | Angle/°    | Atom | Atom | Atom | Angle/°    |
|------|------|------|------------|------|------|------|------------|
| C24  | Mo1  | P1   | 91.87(8)   | C7   | C8   | C20  | 120.5(3)   |
| C24  | Mo1  | C27  | 86.86(15)  | C9   | C8   | C7   | 117.4(3)   |
| C25  | Mo1  | P1   | 94.81(11)  | C9   | C8   | C20  | 122.1(2)   |
| C25  | Mo1  | C24  | 92.34(15)  | C10  | C9   | C8   | 121.3(3)   |
| C25  | Mo1  | C27  | 177.50(14) | C11  | C10  | C9   | 120.3(3)   |
| C26  | Mo1  | P1   | 176.02(9)  | C10  | C11  | C12  | 119.4(3)   |
| C26  | Mo1  | C24  | 91.18(12)  | C11  | C12  | C7   | 120.6(3)   |
| C26  | Mo1  | C25  | 87.61(14)  | C14  | C13  | C19  | 107.4(2)   |
| C26  | Mo1  | C27  | 90.04(13)  | C14  | C13  | C20  | 119.3(2)   |
| C26  | Mo1  | C28  | 85.83(12)  | C19  | C13  | C20  | 106.9(2)   |
| C27  | Mo1  | P1   | 87.58(9)   | C15  | C14  | C13  | 118.7(3)   |
| C28  | Mo1  | P1   | 90.98(9)   | C14  | C15  | C16  | 126.3(3)   |
| C28  | Mo1  | C24  | 175.72(13) | C17  | C16  | C15  | 126.4(3)   |
| C28  | Mo1  | C25  | 90.60(14)  | C16  | C17  | C18  | 125.8(3)   |
| C28  | Mo1  | C27  | 90.07(14)  | C19  | C18  | C17  | 122.2(3)   |
| O7   | P1   | Mo1  | 111.78(7)  | O7   | C19  | C13  | 113.8(2)   |
| O7   | P1   | C20  | 92.80(11)  | C18  | C19  | O7   | 121.1(2)   |
| O7   | P1   | C23  | 104.78(14) | C18  | C19  | C13  | 125.0(3)   |
| C20  | P1   | Mo1  | 129.50(8)  | N1   | C20  | P1   | 112.67(18) |
| C23  | P1   | Mo1  | 115.88(11) | N1   | C20  | C8   | 111.6(2)   |

| Atom | Atom | Atom | Angle/°    | Atom | Atom | Atom | Angle/°    |
|------|------|------|------------|------|------|------|------------|
| C23  | P1   | C20  | 97.86(13)  | N1   | C20  | C13  | 114.0(2)   |
| C19  | O7   | P1   | 114.06(17) | C8   | C20  | P1   | 106.20(17) |
| C5   | N1   | C20  | 117.2(2)   | C8   | C20  | C13  | 110.1(2)   |
| C21  | N1   | C5   | 115.7(2)   | C13  | C20  | P1   | 101.56(16) |
| C21  | N1   | C20  | 126.1(2)   | O6   | C21  | N1   | 119.6(3)   |
| C2   | C1   | C6   | 119.8(4)   | O6   | C21  | C22  | 119.7(3)   |
| C1   | C2   | C3   | 120.4(3)   | N1   | C21  | C22  | 120.5(3)   |
| C2   | C3   | C4   | 120.2(4)   | C21  | C22  | C23  | 118.0(3)   |
| C5   | C4   | C3   | 119.2(3)   | C22  | C23  | P1   | 108.6(2)   |
| C4   | C5   | N1   | 121.3(3)   | O3   | C24  | Mo1  | 175.8(3)   |
| C4   | C5   | C6   | 120.0(3)   | O2   | C25  | Mo1  | 177.7(3)   |
| C6   | C5   | N1   | 118.7(3)   | O1   | C26  | Mo1  | 177.0(3)   |
| C1   | C6   | C5   | 120.3(3)   | O4   | C27  | Mo1  | 178.0(3)   |
| C12  | C7   | C8   | 121.0(3)   | O5   | C28  | Mo1  | 176.6(3)   |

### X-ray crystallographic data of compound 2a'

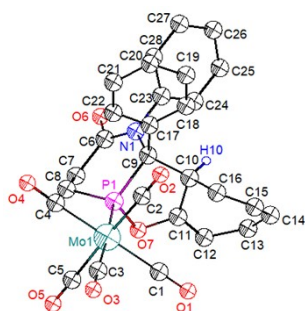

**Table 4 Crystal data and structure refinement for 2a' (CCDC: 2122446).**

|                                    |                                                     |
|------------------------------------|-----------------------------------------------------|
| Identification code                | <b>2a'</b>                                          |
| Empirical formula                  | C <sub>28</sub> H <sub>20</sub> MoNO <sub>7</sub> P |
| Formula weight                     | 609.36                                              |
| Temperature/K                      | 293(2)                                              |
| Crystal system                     | triclinic                                           |
| Space group                        | P-1                                                 |
| a/Å                                | 9.1503(6)                                           |
| b/Å                                | 10.2283(7)                                          |
| c/Å                                | 17.1133(11)                                         |
| α/°                                | 95.243(5)                                           |
| β/°                                | 91.796(6)                                           |
| γ/°                                | 115.453(7)                                          |
| Volume/Å <sup>3</sup>              | 1435.70(18)                                         |
| Z                                  | 1                                                   |
| ρ <sub>calc</sub> /cm <sup>3</sup> | 1.508                                               |
| μ/mm <sup>-1</sup>                 | 5.516                                               |
| F(000)                             | 658.0                                               |

|                                                  |                                                                        |
|--------------------------------------------------|------------------------------------------------------------------------|
| Crystal size/mm <sup>3</sup>                     | 0.16 × 0.12 × 0.08                                                     |
| Radiation                                        | CuK $\alpha$ ( $\lambda$ = 1.54184)                                    |
| 2 $\Theta$ range for data collection/ $^{\circ}$ | 9.642 to 134.136                                                       |
| Index ranges                                     | -10 $\leq$ h $\leq$ 10, -12 $\leq$ k $\leq$ 10, -18 $\leq$ l $\leq$ 20 |
| Reflections collected                            | 10148                                                                  |
| Independent reflections                          | 5120 [ $R_{\text{int}}$ = 0.0377, $R_{\text{sigma}}$ = 0.0530]         |
| Data/restraints/parameters                       | 5120/1/363                                                             |
| Goodness-of-fit on $F^2$                         | 1.034                                                                  |
| Final R indexes [ $I \geq 2\sigma(I)$ ]          | $R_1$ = 0.0423, $wR_2$ = 0.1009                                        |
| Final R indexes [all data]                       | $R_1$ = 0.0535, $wR_2$ = 0.1085                                        |
| Largest diff. peak/hole / e $\text{\AA}^{-3}$    | 0.69/-0.49                                                             |

**Table 5 Bond Lengths for 2a'.**

| Atom | Atom | Length/ $\text{\AA}$ | Atom | Atom | Length/ $\text{\AA}$ |
|------|------|----------------------|------|------|----------------------|
| Mo1  | P1   | 2.4708(9)            | C10  | C11  | 1.500(5)             |
| Mo1  | C1   | 2.056(5)             | C10  | C16  | 1.505(5)             |
| Mo1  | C2   | 2.056(4)             | C11  | C12  | 1.332(5)             |
| Mo1  | C3   | 2.023(5)             | C12  | C13  | 1.435(6)             |
| Mo1  | C4   | 2.026(5)             | C13  | C14  | 1.345(7)             |
| Mo1  | C5   | 2.041(5)             | C14  | C15  | 1.438(7)             |
| P1   | O7   | 1.666(3)             | C15  | C16  | 1.328(6)             |
| P1   | C8   | 1.815(4)             | C17  | C18  | 1.387(5)             |
| P1   | C9   | 1.883(3)             | C17  | C22  | 1.383(5)             |
| O1   | C1   | 1.126(6)             | C18  | C19  | 1.397(6)             |
| O2   | C2   | 1.127(5)             | C19  | C20  | 1.360(7)             |
| O3   | C3   | 1.131(6)             | C20  | C21  | 1.370(7)             |
| O4   | C4   | 1.140(7)             | C21  | C22  | 1.398(6)             |
| O5   | C5   | 1.123(7)             | C23  | C24  | 1.386(5)             |
| O6   | C6   | 1.216(5)             | C23  | C28  | 1.383(5)             |
| O7   | C11  | 1.383(4)             | C24  | C25  | 1.380(6)             |
| N1   | C6   | 1.363(4)             | C25  | C26  | 1.360(7)             |
| N1   | C9   | 1.509(4)             | C26  | C27  | 1.393(7)             |
| N1   | C23  | 1.453(4)             | C27  | C28  | 1.386(6)             |
| C6   | C7   | 1.513(5)             | C11  | C29  | 1.670(11)            |
| C7   | C8   | 1.519(5)             | C11  | C291 | 1.844(13)            |
| C9   | C10  | 1.564(5)             | C29  | C111 | 1.844(13)            |
| C9   | C17  | 1.519(5)             |      |      |                      |

**Table 6 Bond Angles for 2a'.**

| Atom | Atom | Atom | Angle/ $^{\circ}$ | Atom | Atom | Atom | Angle/ $^{\circ}$ |
|------|------|------|-------------------|------|------|------|-------------------|
| C1   | Mo1  | P1   | 90.63(12)         | N1   | C9   | P1   | 113.1(2)          |
| C2   | Mo1  | P1   | 97.10(12)         | N1   | C9   | C10  | 107.9(3)          |
| C2   | Mo1  | C1   | 89.76(18)         | N1   | C9   | C17  | 108.4(3)          |
| C3   | Mo1  | P1   | 174.73(18)        | C10  | C9   | P1   | 99.0(2)           |

| Atom | Atom | Atom | Angle/°    | Atom | Atom | Atom             | Angle/°  |
|------|------|------|------------|------|------|------------------|----------|
| C3   | Mo1  | C1   | 89.45(19)  | C17  | C9   | P1               | 113.0(2) |
| C3   | Mo1  | C2   | 88.2(2)    | C17  | C9   | C10              | 115.3(3) |
| C3   | Mo1  | C4   | 89.5(2)    | C11  | C10  | C9               | 106.4(3) |
| C3   | Mo1  | C5   | 89.3(2)    | C11  | C10  | C16              | 104.8(3) |
| C4   | Mo1  | P1   | 90.55(15)  | C16  | C10  | C9               | 119.9(3) |
| C4   | Mo1  | C1   | 178.4(2)   | O7   | C11  | C10              | 113.6(3) |
| C4   | Mo1  | C2   | 89.0(2)    | C12  | C11  | O7               | 122.8(4) |
| C4   | Mo1  | C5   | 91.0(3)    | C12  | C11  | C10              | 123.6(4) |
| C5   | Mo1  | P1   | 85.47(16)  | C11  | C12  | C13              | 121.2(4) |
| C5   | Mo1  | C1   | 90.1(2)    | C14  | C13  | C12              | 126.1(4) |
| C5   | Mo1  | C2   | 177.4(2)   | C13  | C14  | C15              | 126.1(4) |
| O7   | P1   | Mo1  | 113.75(10) | C16  | C15  | C14              | 125.5(4) |
| O7   | P1   | C8   | 99.40(17)  | C15  | C16  | C10              | 118.7(4) |
| O7   | P1   | C9   | 92.50(14)  | C18  | C17  | C9               | 121.9(3) |
| C8   | P1   | Mo1  | 117.11(13) | C22  | C17  | C9               | 119.4(3) |
| C8   | P1   | C9   | 103.28(16) | C22  | C17  | C18              | 118.4(3) |
| C9   | P1   | Mo1  | 125.48(11) | C17  | C18  | C19              | 120.5(4) |
| C11  | O7   | P1   | 112.5(2)   | C20  | C19  | C18              | 120.1(4) |
| C6   | N1   | C9   | 130.3(3)   | C19  | C20  | C21              | 120.5(4) |
| C6   | N1   | C23  | 114.6(3)   | C20  | C21  | C22              | 119.8(5) |
| C23  | N1   | C9   | 115.1(3)   | C17  | C22  | C21              | 120.7(4) |
| O1   | C1   | Mo1  | 178.9(4)   | C24  | C23  | N1               | 119.4(3) |
| O2   | C2   | Mo1  | 177.0(4)   | C28  | C23  | N1               | 120.3(3) |
| O3   | C3   | Mo1  | 179.0(6)   | C28  | C23  | C24              | 120.2(4) |
| O4   | C4   | Mo1  | 178.5(6)   | C25  | C24  | C23              | 119.6(4) |
| O5   | C5   | Mo1  | 178.6(7)   | C26  | C25  | C24              | 120.9(5) |
| O6   | C6   | N1   | 120.0(3)   | C25  | C26  | C27              | 119.7(4) |
| O6   | C6   | C7   | 119.0(3)   | C28  | C27  | C26              | 120.2(4) |
| N1   | C6   | C7   | 121.0(3)   | C23  | C28  | C27              | 119.3(4) |
| C6   | C7   | C8   | 116.4(3)   | C29  | C11  | C29 <sup>1</sup> | 70.9(6)  |
| C7   | C8   | P1   | 110.7(3)   | C11  | C29  | C11 <sup>1</sup> | 109.1(6) |

**Table 7 Torsion Angles for 2a'.**

| A   | B  | C   | D   | Angle/°     | A   | B   | C   | D   | Angle/°   |
|-----|----|-----|-----|-------------|-----|-----|-----|-----|-----------|
| Mo1 | P1 | O7  | C11 | -105.2(2)   | C9  | N1  | C23 | C24 | 93.7(4)   |
| Mo1 | P1 | C8  | C7  | -168.3(2)   | C9  | N1  | C23 | C28 | -87.6(4)  |
| Mo1 | P1 | C9  | N1  | -160.07(17) | C9  | C10 | C11 | O7  | -23.5(4)  |
| Mo1 | P1 | C9  | C10 | 86.0(2)     | C9  | C10 | C11 | C12 | 157.8(4)  |
| Mo1 | P1 | C9  | C17 | -36.4(3)    | C9  | C10 | C16 | C15 | -171.2(4) |
| P1  | O7 | C11 | C10 | -5.3(4)     | C9  | C17 | C18 | C19 | 173.8(4)  |
| P1  | O7 | C11 | C12 | 173.4(3)    | C9  | C17 | C22 | C21 | -174.6(4) |
| P1  | C9 | C10 | C11 | 36.8(3)     | C10 | C9  | C17 | C18 | 26.1(5)   |
| P1  | C9 | C10 | C16 | -81.7(3)    | C10 | C9  | C17 | C22 | -160.5(3) |

| A  | B   | C   | D   | Angle/°   | A                | B   | C   | D                | Angle/°   |
|----|-----|-----|-----|-----------|------------------|-----|-----|------------------|-----------|
| P1 | C9  | C17 | C18 | 138.9(3)  | C10              | C11 | C12 | C13              | 12.6(6)   |
| P1 | C9  | C17 | C22 | -47.7(4)  | C11              | C10 | C16 | C15              | 69.5(4)   |
| O6 | C6  | C7  | C8  | -149.5(4) | C11              | C12 | C13 | C14              | 30.6(8)   |
| O7 | P1  | C8  | C7  | -45.4(3)  | C12              | C13 | C14 | C15              | 0.2(9)    |
| O7 | P1  | C9  | N1  | 78.2(2)   | C13              | C14 | C15 | C16              | -33.8(8)  |
| O7 | P1  | C9  | C10 | -35.8(2)  | C14              | C15 | C16 | C10              | -8.2(7)   |
| O7 | P1  | C9  | C17 | -158.2(2) | C16              | C10 | C11 | O7               | 104.5(3)  |
| O7 | C11 | C12 | C13 | -165.9(4) | C16              | C10 | C11 | C12              | -74.2(4)  |
| N1 | C6  | C7  | C8  | 31.7(5)   | C17              | C9  | C10 | C11              | 157.6(3)  |
| N1 | C9  | C10 | C11 | -81.1(3)  | C17              | C9  | C10 | C16              | 39.1(4)   |
| N1 | C9  | C10 | C16 | 160.3(3)  | C17              | C18 | C19 | C20              | 0.4(7)    |
| N1 | C9  | C17 | C18 | -94.9(4)  | C18              | C17 | C22 | C21              | -1.0(6)   |
| N1 | C9  | C17 | C22 | 78.5(4)   | C18              | C19 | C20 | C21              | -0.5(8)   |
| N1 | C23 | C24 | C25 | -179.1(4) | C19              | C20 | C21 | C22              | -0.2(8)   |
| N1 | C23 | C28 | C27 | 178.8(4)  | C20              | C21 | C22 | C17              | 0.9(7)    |
| C6 | N1  | C9  | P1  | -1.9(5)   | C22              | C17 | C18 | C19              | 0.3(6)    |
| C6 | N1  | C9  | C10 | 106.6(4)  | C23              | N1  | C6  | O6               | -2.0(5)   |
| C6 | N1  | C9  | C17 | -128.0(4) | C23              | N1  | C6  | C7               | 176.7(3)  |
| C6 | N1  | C23 | C24 | -82.8(4)  | C23              | N1  | C9  | P1               | -177.7(2) |
| C6 | N1  | C23 | C28 | 95.9(4)   | C23              | N1  | C9  | C10              | -69.2(4)  |
| C6 | C7  | C8  | P1  | -57.6(4)  | C23              | N1  | C9  | C17              | 56.2(4)   |
| C8 | P1  | O7  | C11 | 129.5(2)  | C23              | C24 | C25 | C26              | 0.3(7)    |
| C8 | P1  | C9  | N1  | -22.1(3)  | C24              | C23 | C28 | C27              | -2.5(6)   |
| C8 | P1  | C9  | C10 | -136.0(2) | C24              | C25 | C26 | C27              | -2.4(8)   |
| C8 | P1  | C9  | C17 | 101.5(3)  | C25              | C26 | C27 | C28              | 2.0(8)    |
| C9 | P1  | O7  | C11 | 25.6(2)   | C26              | C27 | C28 | C23              | 0.4(7)    |
| C9 | P1  | C8  | C7  | 49.5(3)   | C28              | C23 | C24 | C25              | 2.1(6)    |
| C9 | N1  | C6  | O6  | -177.9(4) | C29 <sup>1</sup> | C11 | C29 | C11 <sup>1</sup> | -0.001(1) |
| C9 | N1  | C6  | C7  | 0.9(6)    |                  |     |     |                  |           |

### X-ray crystallographic data of compound 3

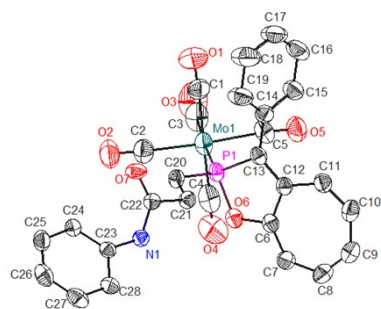

**Table 8** Crystal data and structure refinement for 3 (CCDC: 2122444) .



|                                             |                                                               |
|---------------------------------------------|---------------------------------------------------------------|
| Identification code                         | <b>3</b>                                                      |
| Empirical formula                           | C <sub>28</sub> H <sub>20</sub> MoNO <sub>7</sub> P           |
| Formula weight                              | 609.36                                                        |
| Temperature/K                               | 293(2)                                                        |
| Crystal system                              | monoclinic                                                    |
| Space group                                 | P2 <sub>1</sub> /c                                            |
| a/Å                                         | 11.45862(18)                                                  |
| b/Å                                         | 31.4061(4)                                                    |
| c/Å                                         | 8.29854(16)                                                   |
| α/°                                         | 90                                                            |
| β/°                                         | 103.2846(18)                                                  |
| γ/°                                         | 90                                                            |
| Volume/Å <sup>3</sup>                       | 2906.49(8)                                                    |
| Z                                           | 4                                                             |
| ρ <sub>calc</sub> /cm <sup>3</sup>          | 1.393                                                         |
| μ/mm <sup>-1</sup>                          | 4.584                                                         |
| F(000)                                      | 1232.0                                                        |
| Crystal size/mm <sup>3</sup>                | 0.293 × 0.067 × 0.056                                         |
| Radiation                                   | CuKα (λ = 1.54184)                                            |
| 2θ range for data collection/°              | 8.414 to 134.138                                              |
| Index ranges                                | -13 ≤ h ≤ 13, -37 ≤ k ≤ 36, -6 ≤ l ≤ 9                        |
| Reflections collected                       | 11377                                                         |
| Independent reflections                     | 5178 [R <sub>int</sub> = 0.0371, R <sub>sigma</sub> = 0.0478] |
| Data/restraints/parameters                  | 5178/74/381                                                   |
| Goodness-of-fit on F <sup>2</sup>           | 1.021                                                         |
| Final R indexes [I ≥ 2σ (I)]                | R <sub>1</sub> = 0.0515, wR <sub>2</sub> = 0.1332             |
| Final R indexes [all data]                  | R <sub>1</sub> = 0.0682, wR <sub>2</sub> = 0.1502             |
| Largest diff. peak/hole / e Å <sup>-3</sup> | 0.72/-0.28                                                    |

**Table 9 Bond Lengths for 3.**

| Atom | Atom | Length/Å  | Atom | Atom | Length/Å |
|------|------|-----------|------|------|----------|
| C1   | Mo1  | 2.048(10) | C10  | C11  | 1.334(6) |
| C1   | O1   | 1.18(2)   | C11  | C12  | 1.454(5) |
| C1A  | Mo1A | 2.16(4)   | C12  | C13  | 1.362(5) |
| C1A  | O1A  | 1.02(7)   | C13  | C14  | 1.476(6) |
| C2   | Mo1  | 2.048(12) | C13  | P1   | 1.797(4) |
| C2   | O2   | 1.151(17) | C14  | C15  | 1.377(6) |
| C2A  | Mo1A | 2.03(3)   | C14  | C19  | 1.386(6) |
| C2A  | O2A  | 1.12(4)   | C15  | C16  | 1.395(7) |
| C3   | Mo1  | 2.041(10) | C16  | C17  | 1.350(8) |
| C3   | O3   | 1.135(14) | C17  | C18  | 1.353(9) |
| C3A  | Mo1A | 1.93(2)   | C18  | C19  | 1.401(8) |
| C3A  | O3A  | 1.14(4)   | C20  | C21  | 1.511(5) |
| C4   | Mo1  | 2.062(16) | C20  | P1   | 1.828(4) |

| Atom | Atom | Length/Å  | Atom | Atom | Length/Å   |
|------|------|-----------|------|------|------------|
| C4   | O4   | 1.137(16) | C21  | C22  | 1.519(5)   |
| C4A  | Mo1A | 2.04(3)   | C22  | N1   | 1.340(5)   |
| C4A  | O4A  | 1.20(2)   | C22  | O7   | 1.214(4)   |
| C5   | Mo1  | 2.09(2)   | C23  | C24  | 1.377(5)   |
| C5   | O5   | 1.08(5)   | C23  | C28  | 1.396(5)   |
| C5A  | Mo1A | 2.01(7)   | C23  | N1   | 1.417(4)   |
| C5A  | O5A  | 1.25(11)  | C24  | C25  | 1.383(6)   |
| C6   | C7   | 1.343(6)  | C25  | C26  | 1.356(7)   |
| C6   | C12  | 1.453(5)  | C26  | C27  | 1.363(7)   |
| C6   | O6   | 1.373(5)  | C27  | C28  | 1.385(6)   |
| C7   | C8   | 1.427(7)  | Mo1  | P1   | 2.4149(19) |
| C8   | C9   | 1.333(7)  | Mo1A | P1   | 2.563(4)   |
| C9   | C10  | 1.424(7)  | O6   | P1   | 1.670(3)   |

**Table 10 Bond Angles for 3.**

| Atom | Atom | Atom | Angle/°   | Atom | Atom | Atom | Angle/°   |
|------|------|------|-----------|------|------|------|-----------|
| O1   | C1   | Mo1  | 175.7(13) | C26  | C27  | C28  | 121.1(4)  |
| O1A  | C1A  | Mo1A | 173(5)    | C27  | C28  | C23  | 119.1(4)  |
| O2   | C2   | Mo1  | 177.5(10) | C1   | Mo1  | C4   | 178.7(5)  |
| O2A  | C2A  | Mo1A | 178(3)    | C1   | Mo1  | C5   | 86.6(8)   |
| O3   | C3   | Mo1  | 177.3(13) | C1   | Mo1  | P1   | 88.5(4)   |
| O3A  | C3A  | Mo1A | 179(3)    | C2   | Mo1  | C1   | 89.9(5)   |
| O4   | C4   | Mo1  | 177.6(13) | C2   | Mo1  | C4   | 90.2(6)   |
| O4A  | C4A  | Mo1A | 171(4)    | C2   | Mo1  | C5   | 175.9(8)  |
| O5   | C5   | Mo1  | 173(3)    | C2   | Mo1  | P1   | 94.7(4)   |
| O5A  | C5A  | Mo1A | 165(6)    | C3   | Mo1  | C1   | 89.4(5)   |
| C7   | C6   | C12  | 132.6(4)  | C3   | Mo1  | C2   | 89.0(5)   |
| C7   | C6   | O6   | 116.7(4)  | C3   | Mo1  | C4   | 91.9(4)   |
| O6   | C6   | C12  | 110.7(3)  | C3   | Mo1  | C5   | 88.8(7)   |
| C6   | C7   | C8   | 127.8(4)  | C3   | Mo1  | P1   | 175.8(3)  |
| C9   | C8   | C7   | 128.6(5)  | C4   | Mo1  | C5   | 93.4(8)   |
| C8   | C9   | C10  | 128.4(5)  | C4   | Mo1  | P1   | 90.2(3)   |
| C11  | C10  | C9   | 130.7(5)  | C5   | Mo1  | P1   | 87.4(6)   |
| C10  | C11  | C12  | 129.7(4)  | C1A  | Mo1A | P1   | 91.7(10)  |
| C6   | C12  | C11  | 122.0(4)  | C2A  | Mo1A | C1A  | 88.3(13)  |
| C13  | C12  | C6   | 114.2(3)  | C2A  | Mo1A | C4   | 90.6(15)  |
| C13  | C12  | C11  | 123.8(4)  | C2A  | Mo1A | P1   | 91.2(10)  |
| C12  | C13  | C14  | 127.8(4)  | C3A  | Mo1A | C1A  | 85.4(13)  |
| C12  | C13  | P1   | 108.7(3)  | C3A  | Mo1A | C2A  | 92.0(12)  |
| C14  | C13  | P1   | 123.2(3)  | C3A  | Mo1A | C4A  | 94.6(12)  |
| C15  | C14  | C13  | 122.0(4)  | C3A  | Mo1A | C5A  | 92.3(19)  |
| C15  | C14  | C19  | 117.0(4)  | C3A  | Mo1A | P1   | 175.6(8)  |
| C19  | C14  | C13  | 121.0(4)  | C4A  | Mo1A | C1A  | 178.9(17) |

| Atom | Atom | Atom | Angle/°  | Atom | Atom | Atom | Angle/°    |
|------|------|------|----------|------|------|------|------------|
| C14  | C15  | C16  | 121.6(5) | C4A  | Mo1A | P1   | 88.3(8)    |
| C17  | C16  | C15  | 119.9(5) | C5A  | Mo1A | C1A  | 106.1(17)  |
| C16  | C17  | C18  | 120.5(6) | C5A  | Mo1A | C2A  | 165.3(17)  |
| C17  | C18  | C19  | 119.9(6) | C5A  | Mo1A | C4A  | 75.0(19)   |
| C14  | C19  | C18  | 121.0(5) | C5A  | Mo1A | P1   | 85.4(17)   |
| C21  | C20  | P1   | 115.3(3) | C22  | N1   | C23  | 128.1(3)   |
| C20  | C21  | C22  | 110.6(3) | C6   | O6   | P1   | 114.4(2)   |
| N1   | C22  | C21  | 114.8(3) | C13  | P1   | C20  | 106.44(18) |
| O7   | C22  | C21  | 120.2(3) | C13  | P1   | Mo1  | 119.54(14) |
| O7   | C22  | N1   | 125.0(3) | C13  | P1   | Mo1A | 113.96(16) |
| C24  | C23  | C28  | 119.4(4) | C20  | P1   | Mo1  | 120.09(14) |
| C24  | C23  | N1   | 122.9(3) | C20  | P1   | Mo1A | 116.78(17) |
| C28  | C23  | N1   | 117.6(3) | O6   | P1   | C13  | 92.02(16)  |
| C23  | C24  | C25  | 119.6(4) | O6   | P1   | C20  | 101.07(17) |
| C26  | C25  | C24  | 121.2(4) | O6   | P1   | Mo1  | 112.72(14) |
| C25  | C26  | C27  | 119.6(4) | O6   | P1   | Mo1A | 122.92(16) |

**Table 11 Torsion Angles for 3.**

| A   | B   | C   | D    | Angle/°   | A   | B   | C   | D    | Angle/°   |
|-----|-----|-----|------|-----------|-----|-----|-----|------|-----------|
| C6  | C7  | C8  | C9   | -2.6(9)   | C14 | C15 | C16 | C17  | 2.0(9)    |
| C6  | C12 | C13 | C14  | -176.5(4) | C15 | C14 | C19 | C18  | -0.5(10)  |
| C6  | C12 | C13 | P1   | -1.8(4)   | C15 | C16 | C17 | C18  | -0.5(12)  |
| C6  | O6  | P1  | C13  | -1.0(3)   | C16 | C17 | C18 | C19  | -1.3(14)  |
| C6  | O6  | P1  | C20  | -108.2(3) | C17 | C18 | C19 | C14  | 1.8(13)   |
| C6  | O6  | P1  | Mo1  | 122.3(2)  | C19 | C14 | C15 | C16  | -1.4(8)   |
| C6  | O6  | P1  | Mo1A | 119.4(3)  | C20 | C21 | C22 | N1   | 122.1(4)  |
| C7  | C6  | C12 | C11  | 4.0(7)    | C20 | C21 | C22 | O7   | -57.9(5)  |
| C7  | C6  | C12 | C13  | -178.2(4) | C21 | C20 | P1  | C13  | -45.2(4)  |
| C7  | C6  | O6  | P1   | 179.6(3)  | C21 | C20 | P1  | Mo1  | 174.9(3)  |
| C7  | C8  | C9  | C10  | 0.1(11)   | C21 | C20 | P1  | Mo1A | -173.7(3) |
| C8  | C9  | C10 | C11  | 3.1(11)   | C21 | C20 | P1  | O6   | 50.3(3)   |
| C9  | C10 | C11 | C12  | -1.0(10)  | C21 | C22 | N1  | C23  | -175.2(3) |
| C10 | C11 | C12 | C6   | -3.4(7)   | C23 | C24 | C25 | C26  | -1.9(7)   |
| C10 | C11 | C12 | C13  | 179.0(5)  | C24 | C23 | C28 | C27  | -1.0(6)   |
| C11 | C12 | C13 | C14  | 1.3(6)    | C24 | C23 | N1  | C22  | 28.3(6)   |
| C11 | C12 | C13 | P1   | 176.0(3)  | C24 | C25 | C26 | C27  | -0.7(8)   |
| C12 | C6  | C7  | C8   | -0.1(8)   | C25 | C26 | C27 | C28  | 2.5(8)    |
| C12 | C6  | O6  | P1   | 0.2(4)    | C26 | C27 | C28 | C23  | -1.7(7)   |
| C12 | C13 | C14 | C15  | 65.3(6)   | C28 | C23 | C24 | C25  | 2.7(6)    |
| C12 | C13 | C14 | C19  | -115.4(6) | C28 | C23 | N1  | C22  | -154.5(4) |
| C12 | C13 | P1  | C20  | 103.8(3)  | N1  | C23 | C24 | C25  | 179.9(4)  |
| C12 | C13 | P1  | Mo1  | -116.1(3) | N1  | C23 | C28 | C27  | -178.3(4) |
| C12 | C13 | P1  | Mo1A | -126.0(3) | O6  | C6  | C7  | C8   | -179.4(4) |

| <b>A</b> | <b>B</b> | <b>C</b> | <b>D</b> | <b>Angle/°</b> | <b>A</b> | <b>B</b> | <b>C</b> | <b>D</b> | <b>Angle/°</b> |
|----------|----------|----------|----------|----------------|----------|----------|----------|----------|----------------|
| C12      | C13      | P1       | O6       | 1.6(3)         | O6       | C6       | C12      | C11      | -176.7(3)      |
| C13      | C14      | C15      | C16      | 177.9(5)       | O6       | C6       | C12      | C13      | 1.1(4)         |
| C13      | C14      | C19      | C18      | -179.8(7)      | O7       | C22      | N1       | C23      | 4.9(6)         |
| C14      | C13      | P1       | C20      | -81.2(3)       | P1       | C13      | C14      | C15      | -108.7(5)      |
| C14      | C13      | P1       | Mo1      | 58.9(4)        | P1       | C13      | C14      | C19      | 70.6(6)        |
| C14      | C13      | P1       | Mo1A     | 49.0(4)        | P1       | C20      | C21      | C22      | 176.8(3)       |
| C14      | C13      | P1       | O6       | 176.6(3)       |          |          |          |          |                |

# NMR spectra

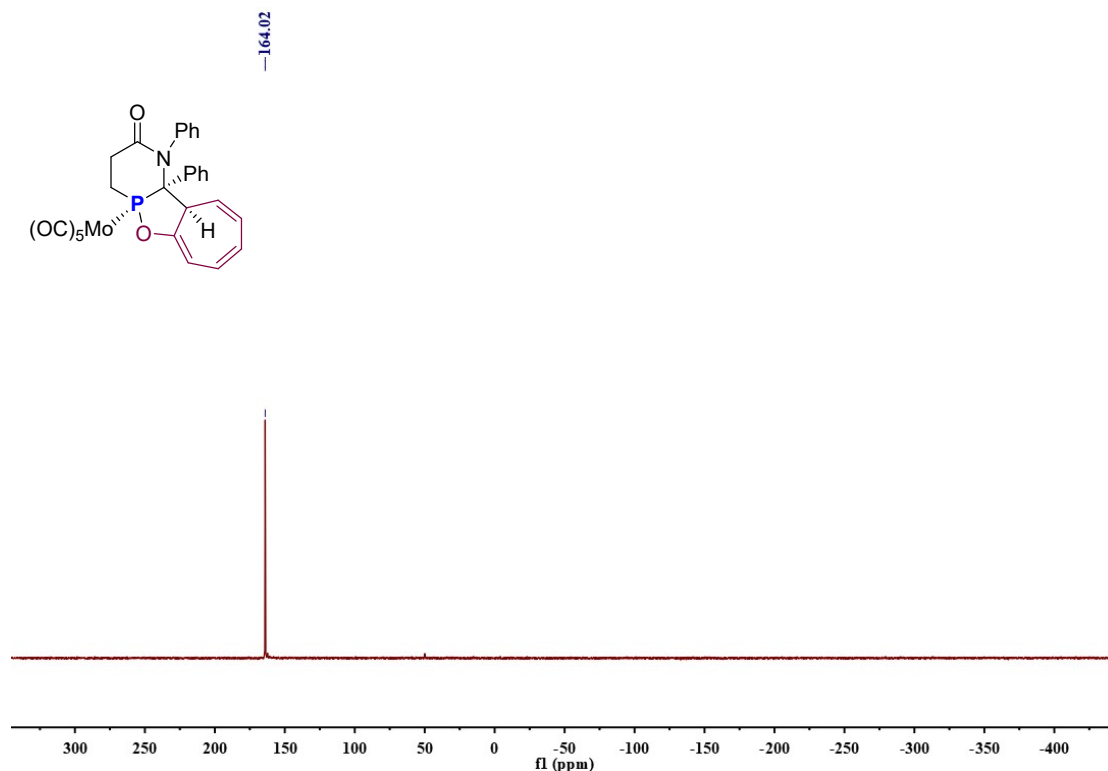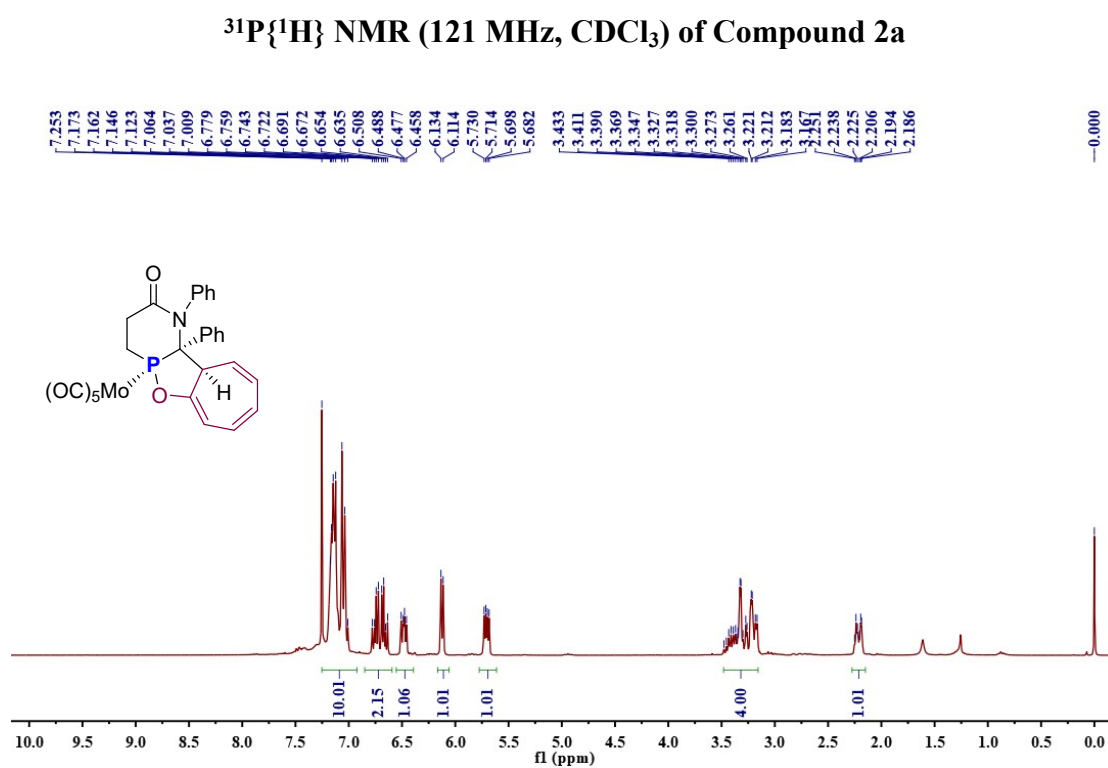

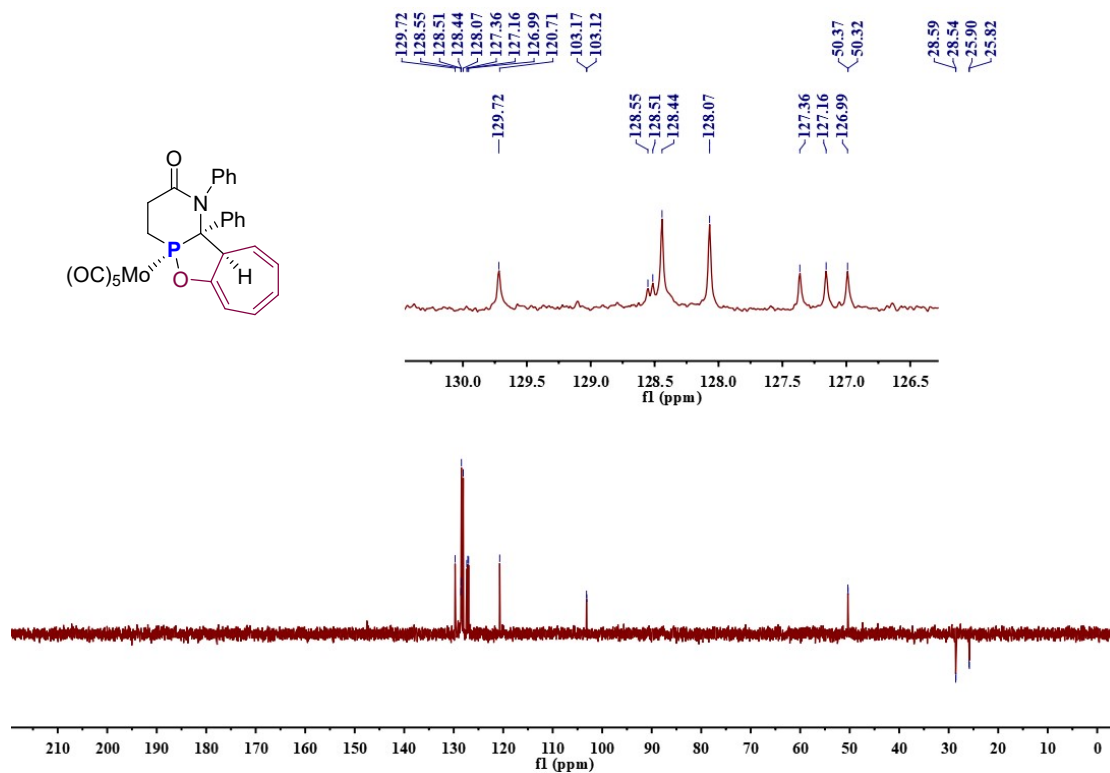

Dept 135 NMR (75 MHz,  $CDCl_3$ ) of Compound 2a

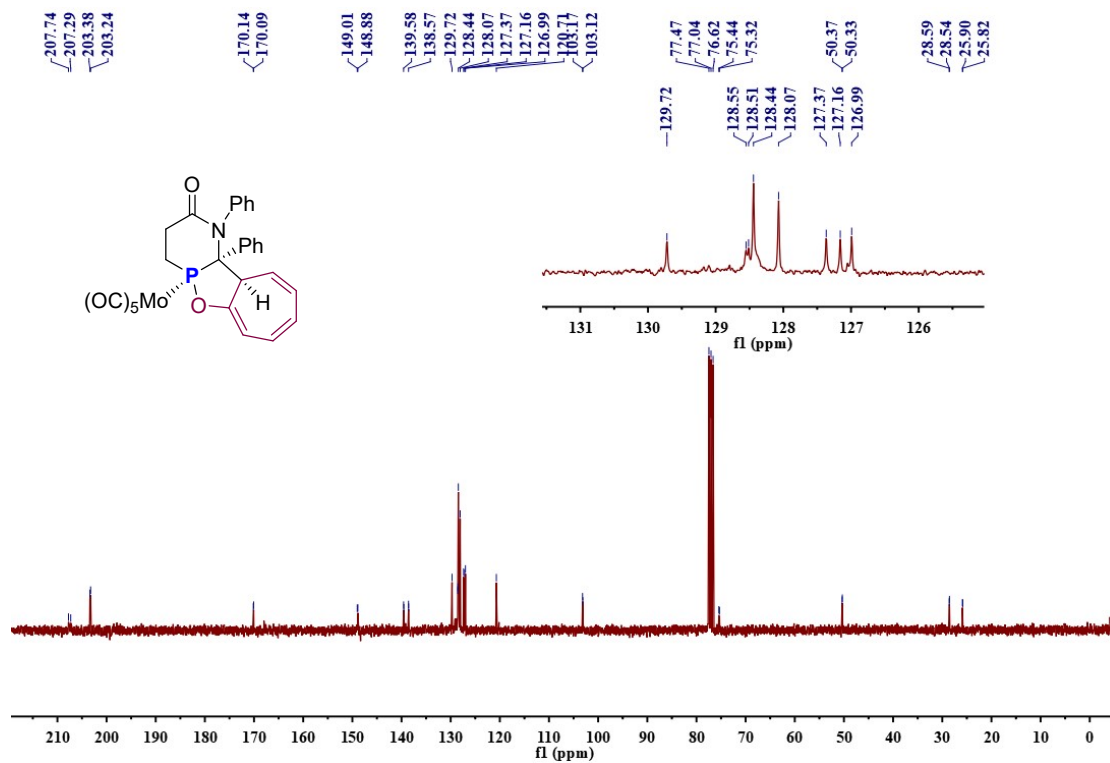

$^{13}C\{^1H\}$  NMR (75 MHz,  $CDCl_3$ ) of Compound 2a

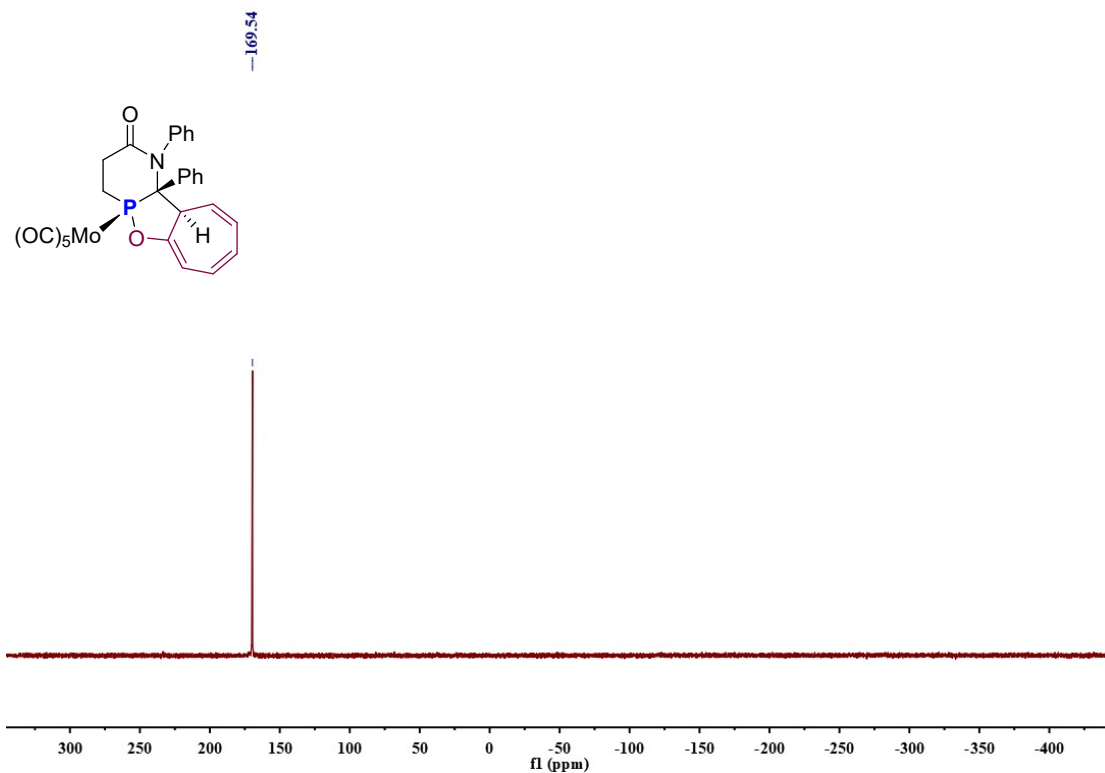

$^{31}\text{P}\{^1\text{H}\}$  NMR (121 MHz,  $\text{CDCl}_3$ ) of Compound 2a'

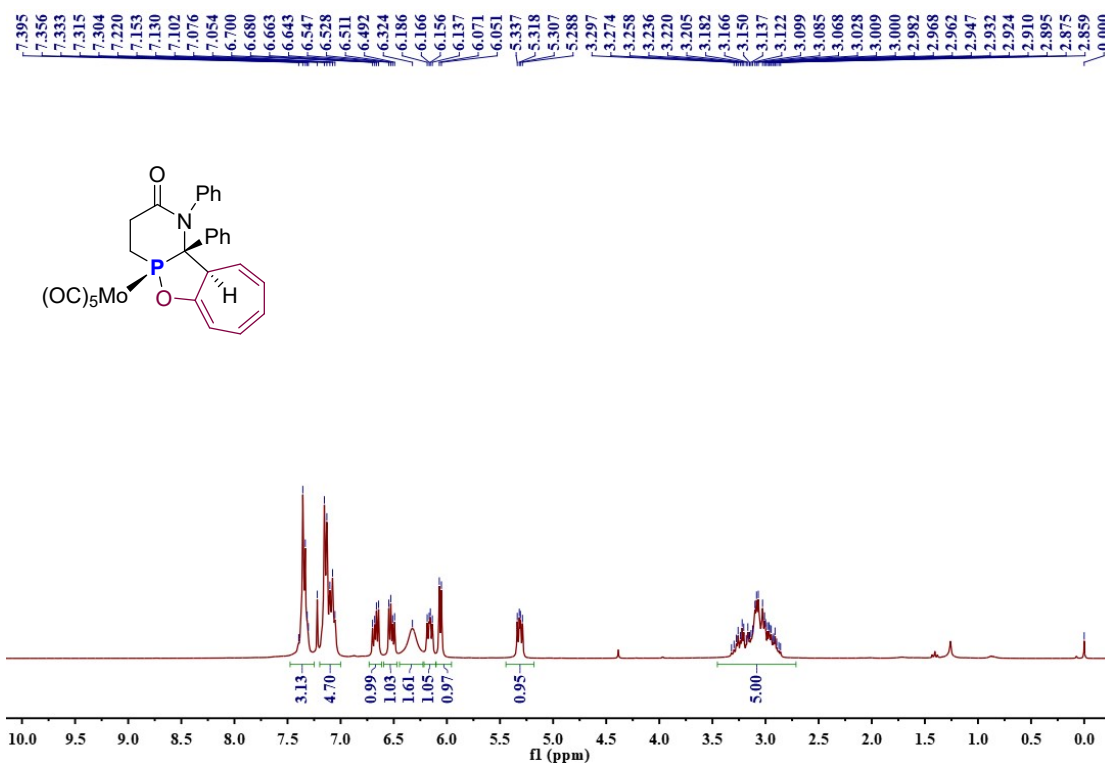

$^1\text{H}$  NMR (300 MHz,  $\text{CDCl}_3$ ) of Compound 2a'

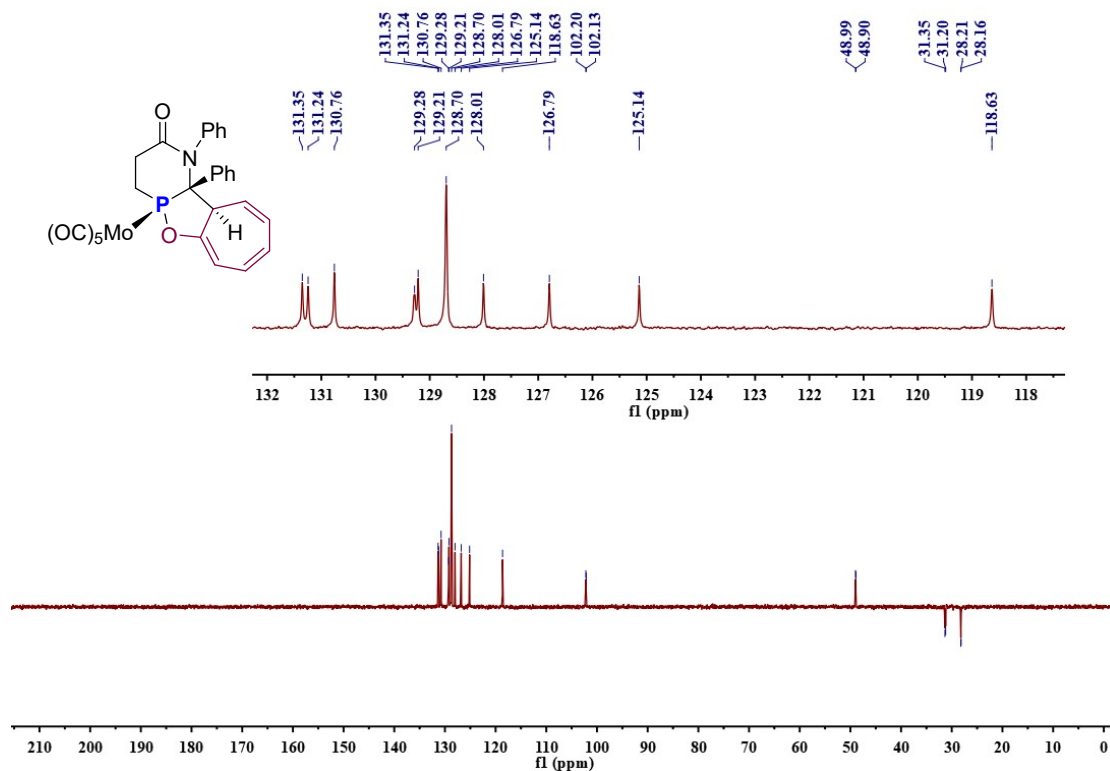

**Dept 135 NMR (75 MHz, CDCl<sub>3</sub>) of Compound 2a'**

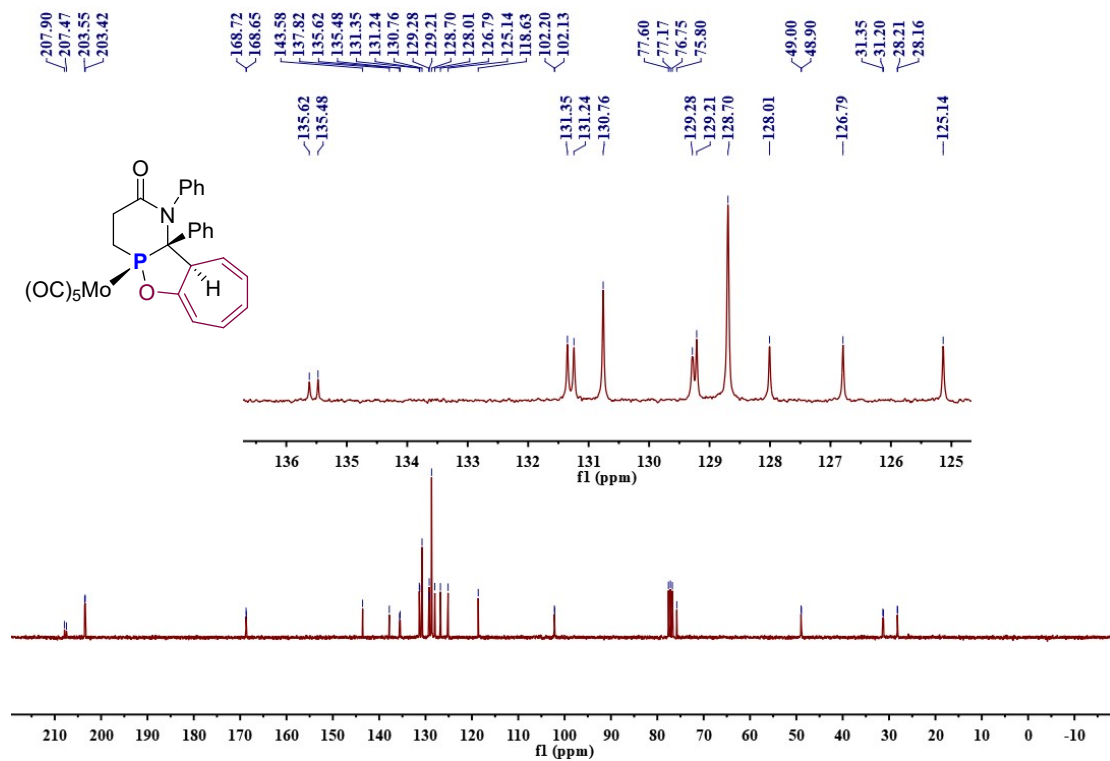

**<sup>13</sup>C{<sup>1</sup>H} NMR (75 MHz, CDCl<sub>3</sub>) of Compound 2a'**



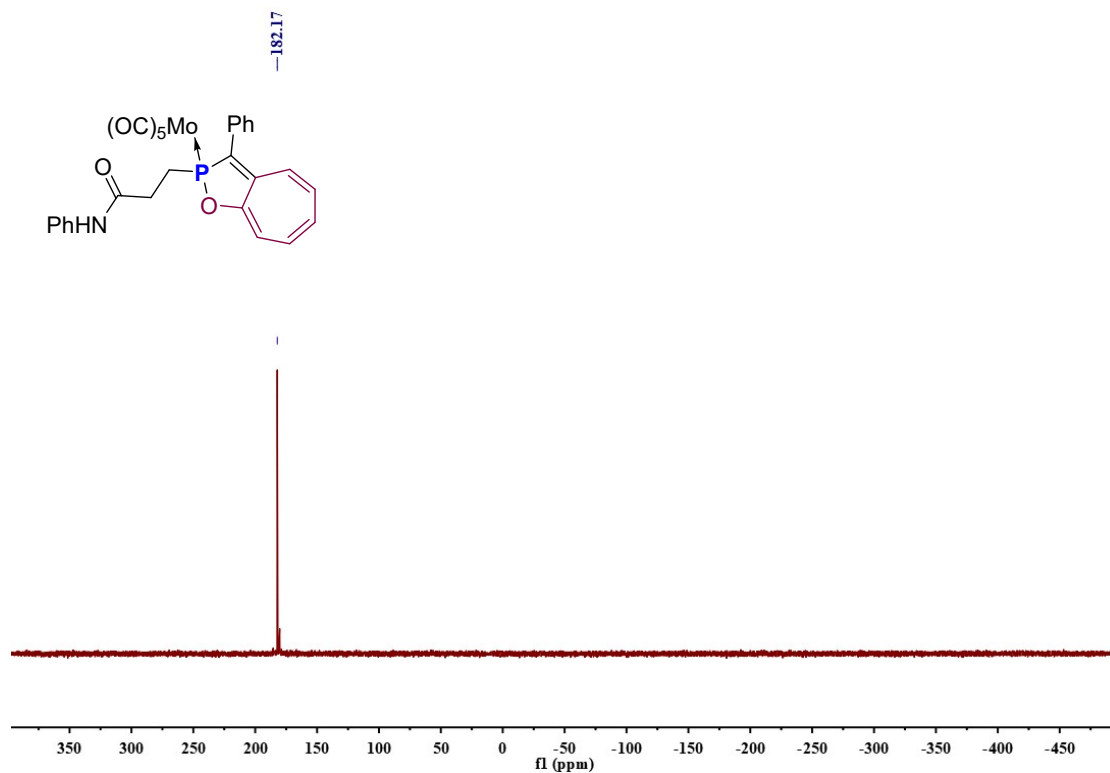

$^{31}\text{P}\{^1\text{H}\}$  NMR (121 MHz,  $\text{CDCl}_3$ ) of Compound 3

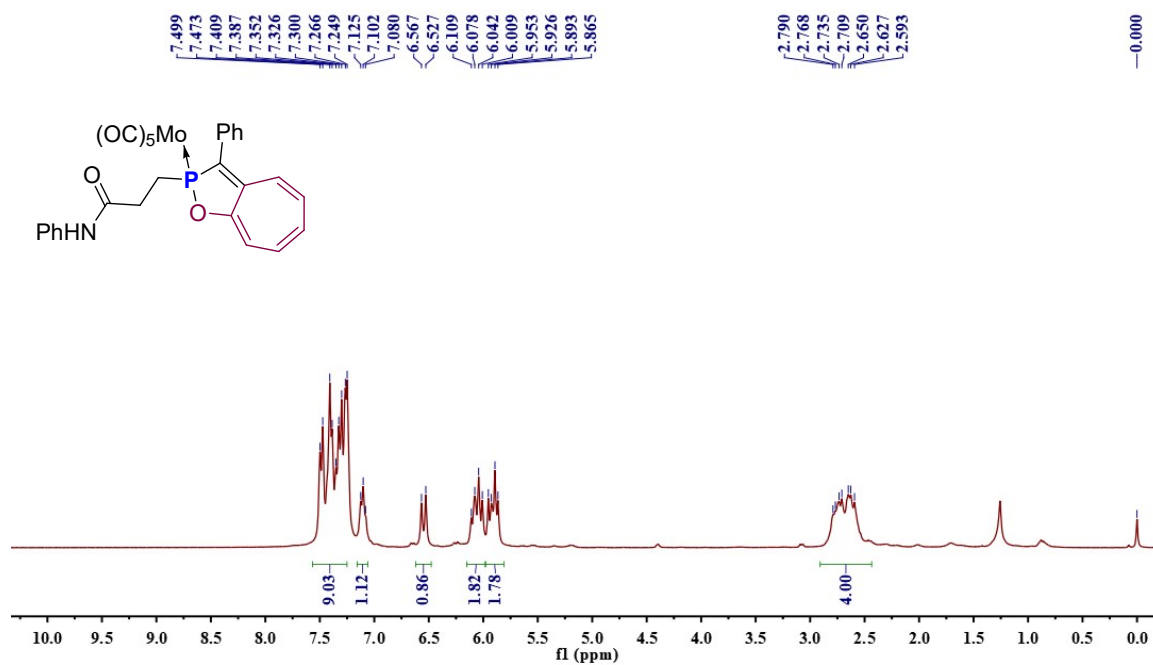

$^1\text{H}$  NMR (300 MHz,  $\text{CDCl}_3$ ) of Compound 3

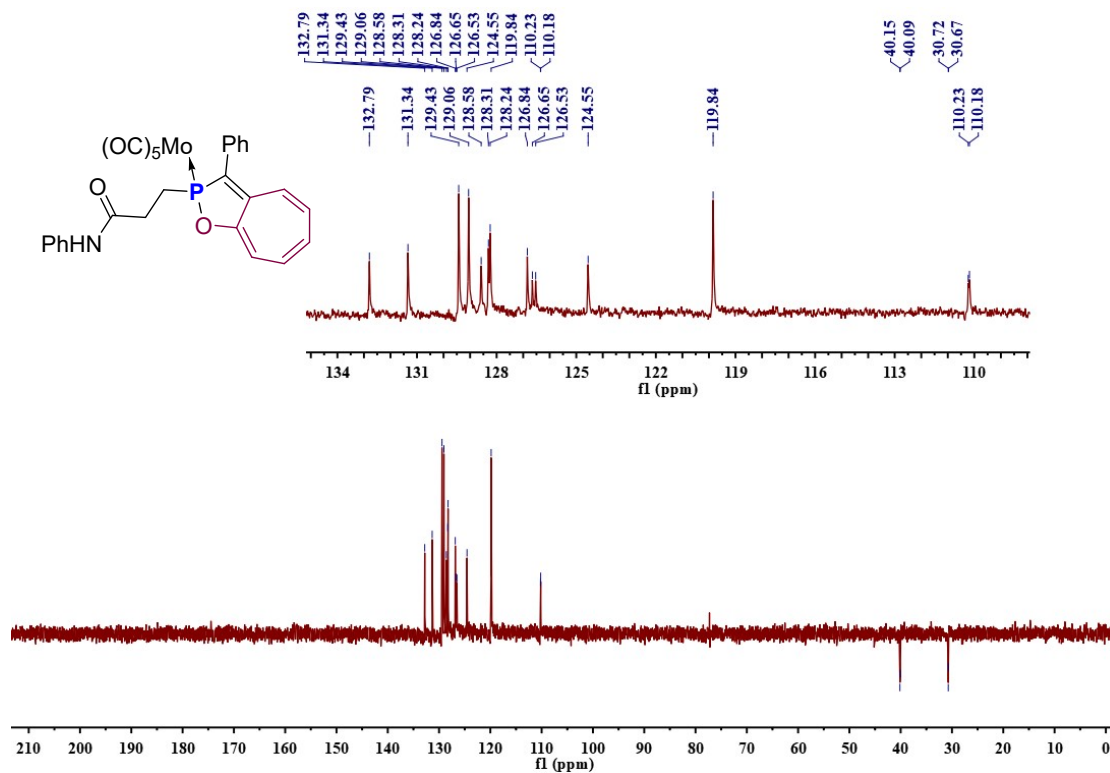

Dept 135 NMR (75 MHz,  $CDCl_3$ ) of Compound 3

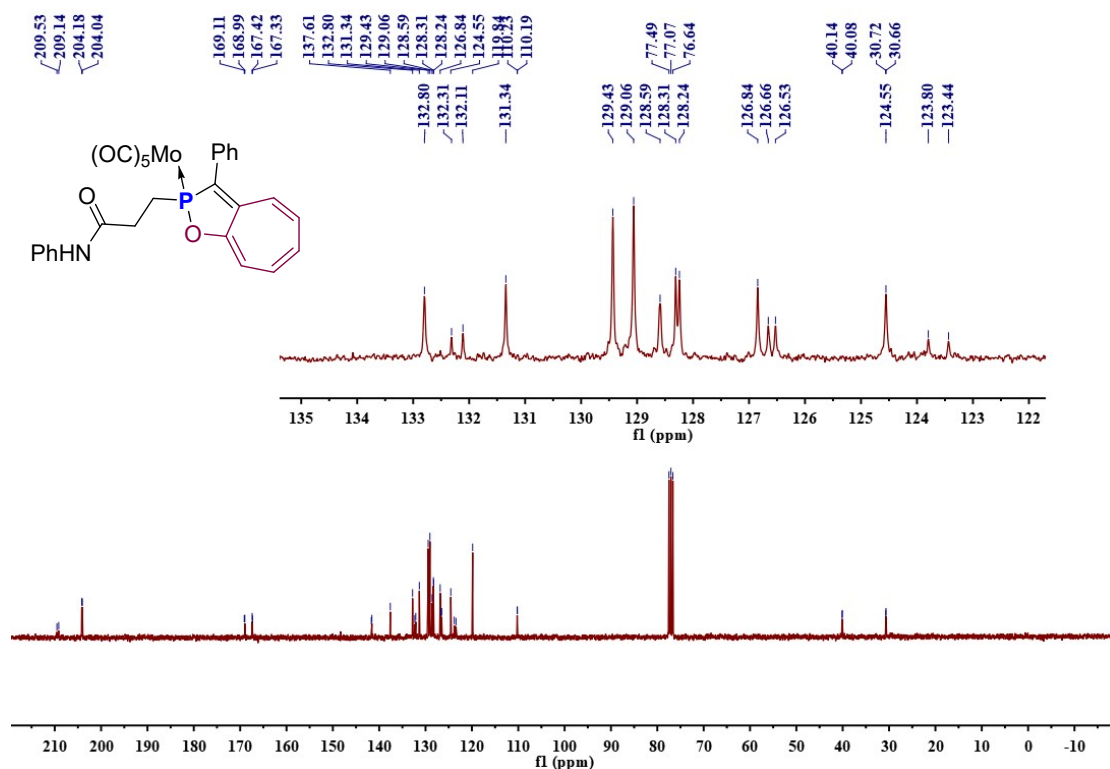

$^{13}C\{^1H\}$  NMR (75 MHz,  $CDCl_3$ ) of Compound 3

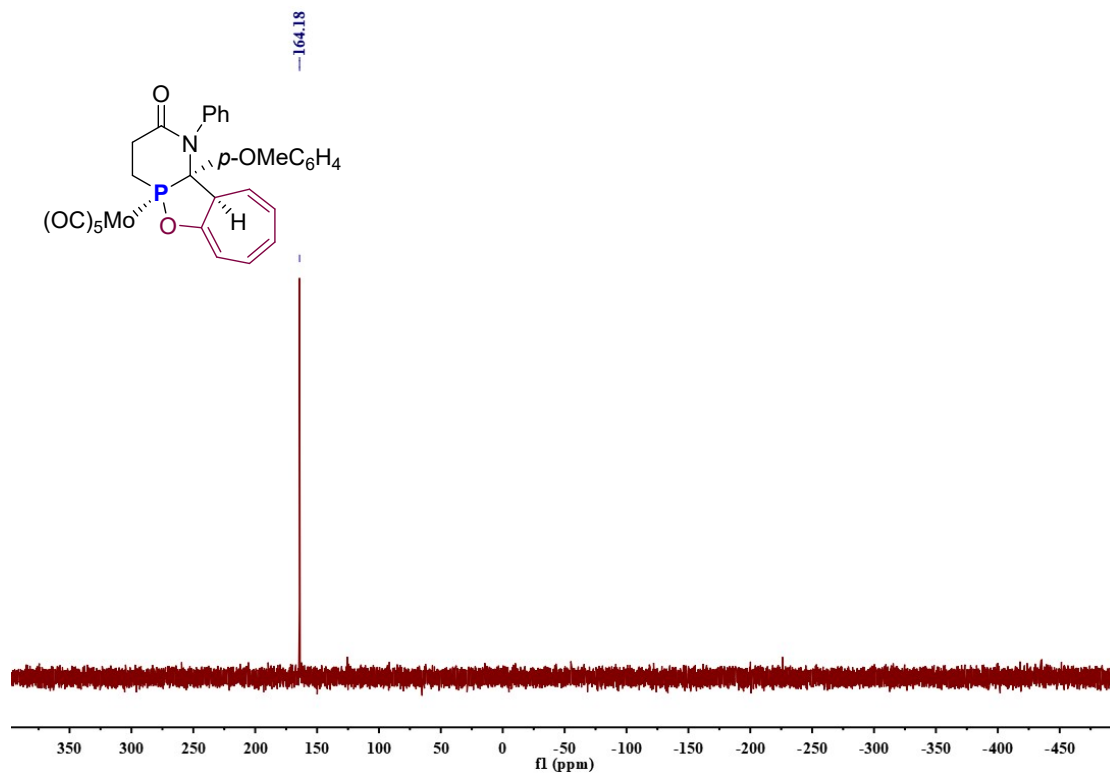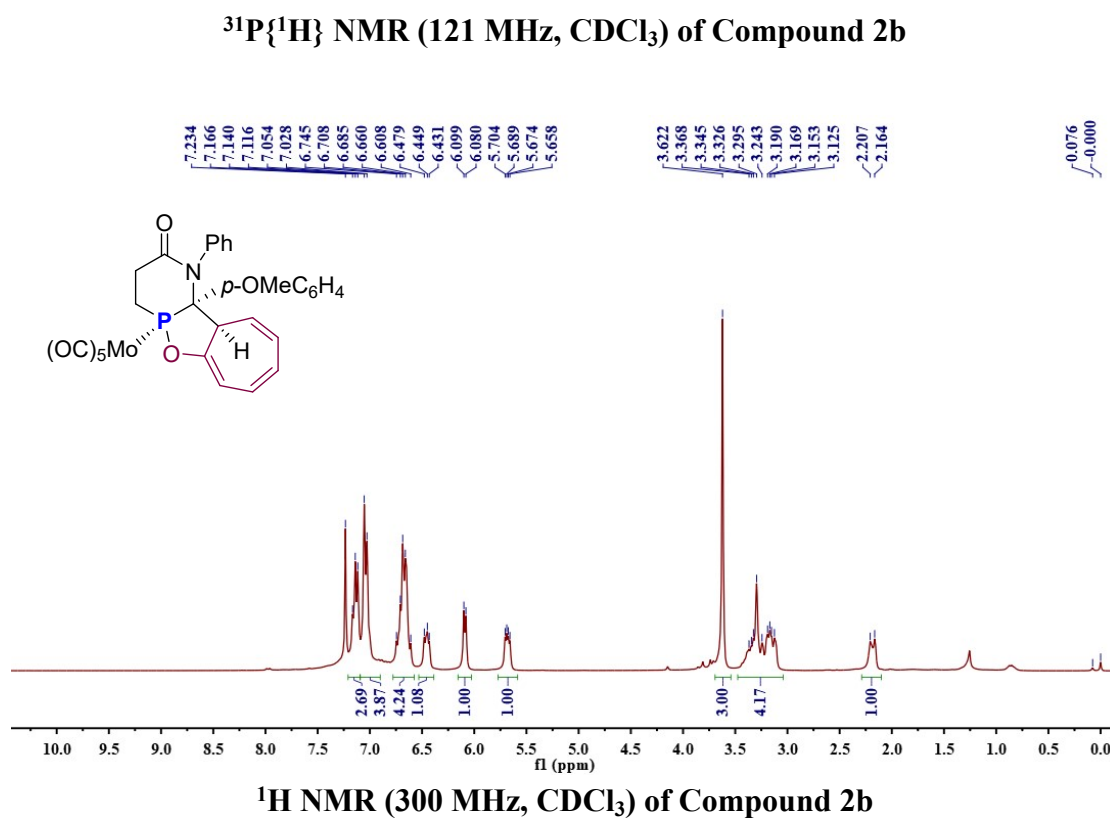

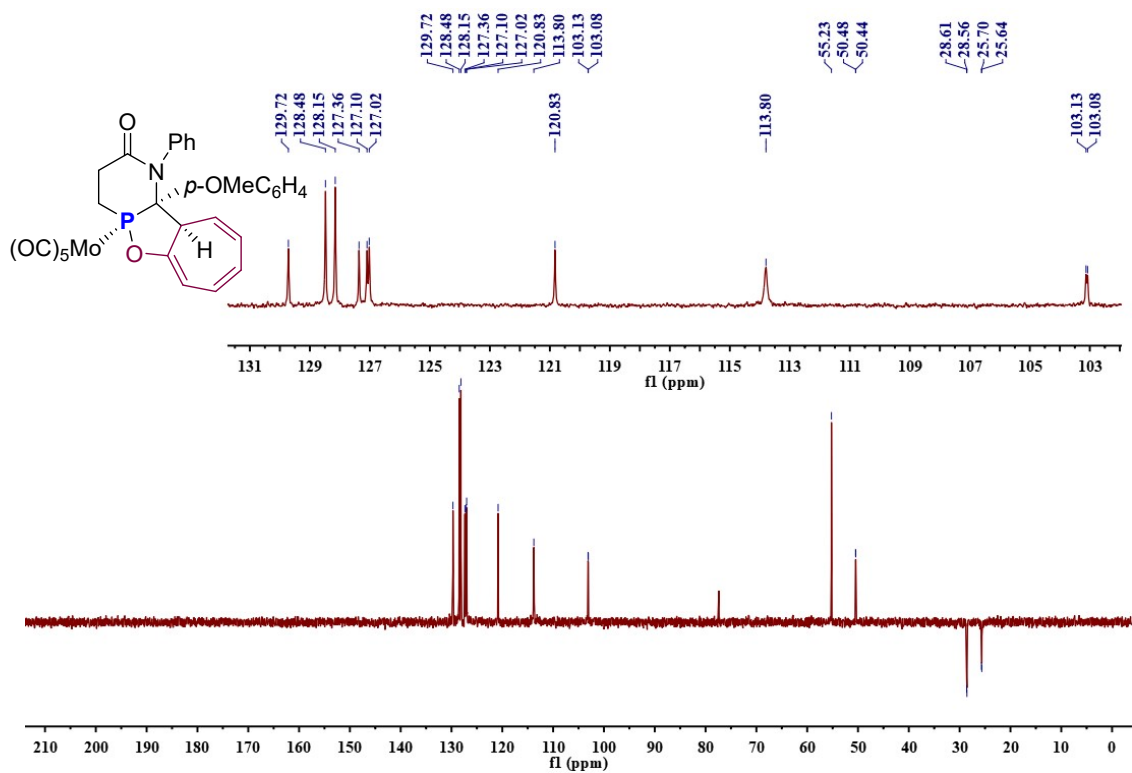

Dept 135 NMR (75 MHz, CDCl<sub>3</sub>) of Compound 2b

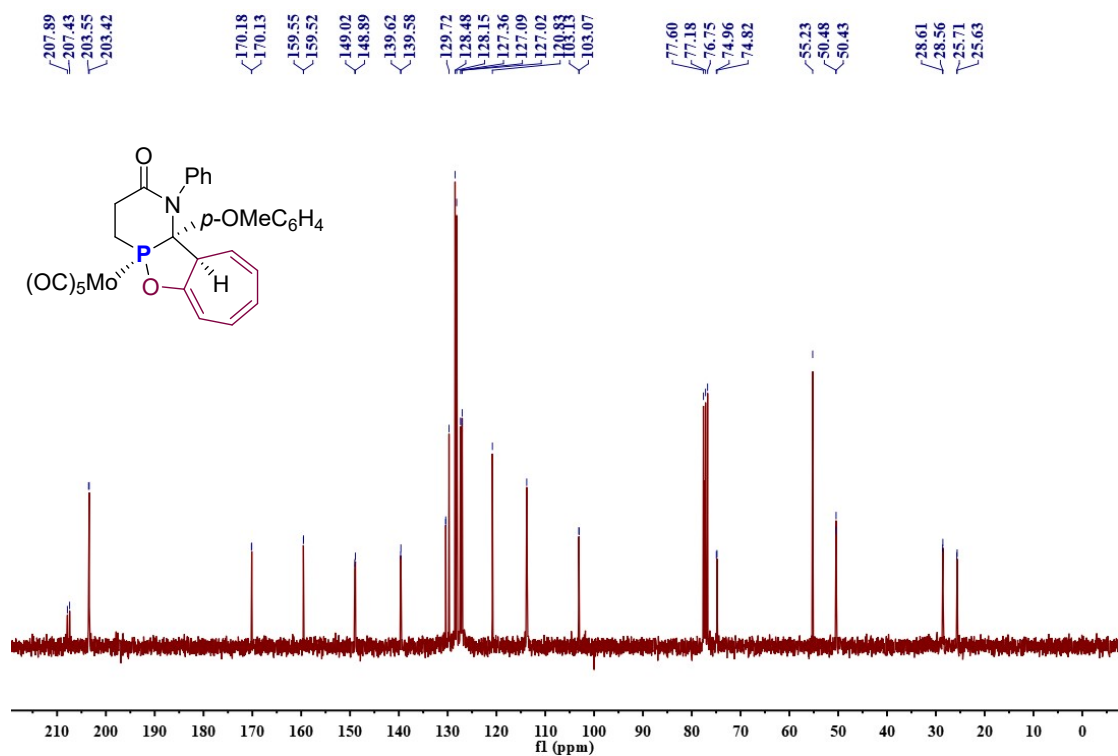

<sup>13</sup>C{<sup>1</sup>H} NMR (75 MHz, CDCl<sub>3</sub>) of Compound 2b

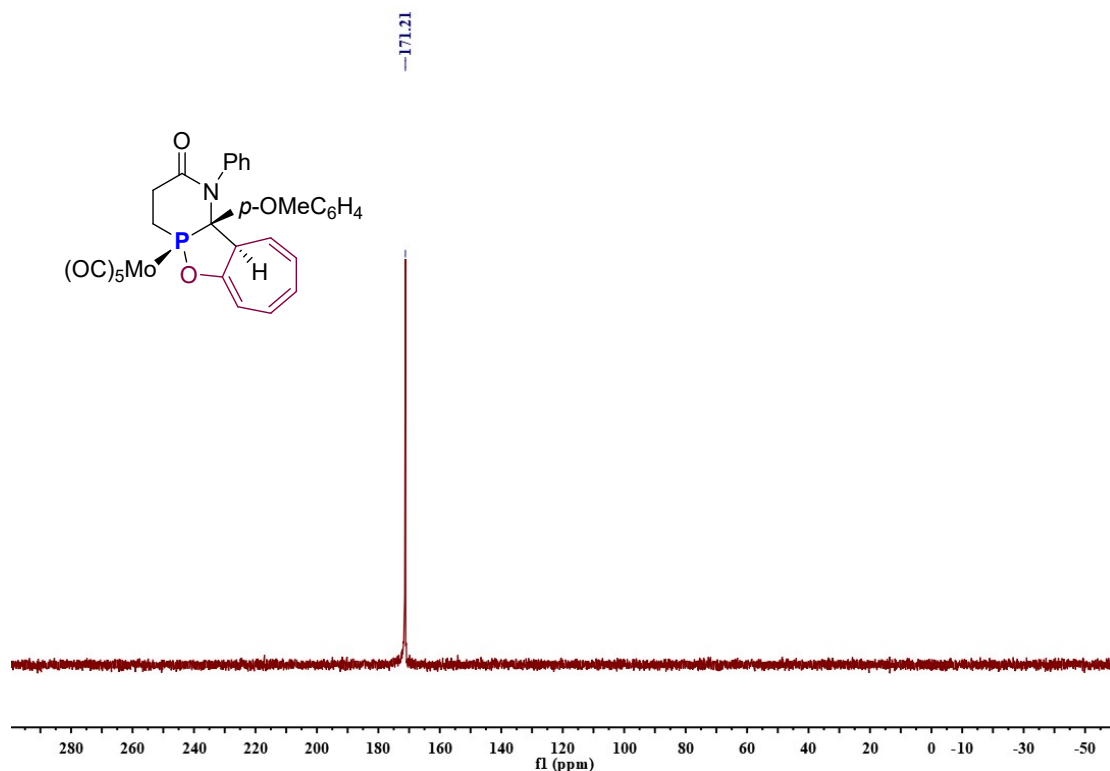

$^{31}\text{P}\{^1\text{H}\}$  NMR (121 MHz,  $\text{CDCl}_3$ ) of Compound 2b'

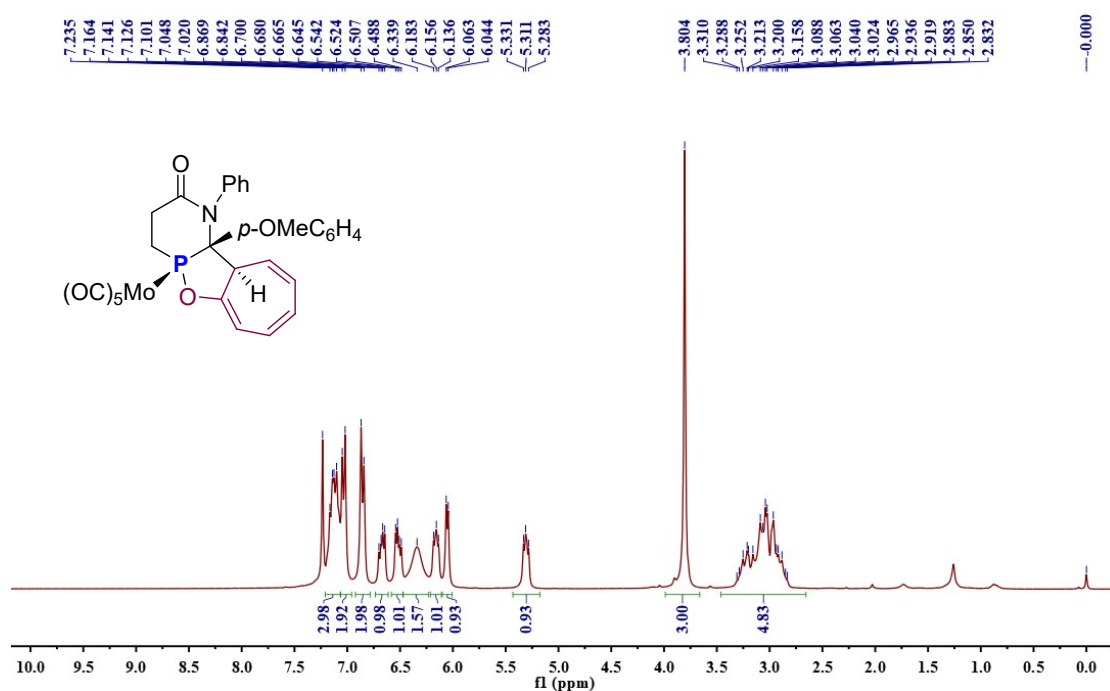

$^1\text{H}$  NMR (300 MHz,  $\text{CDCl}_3$ ) of Compound 2b'

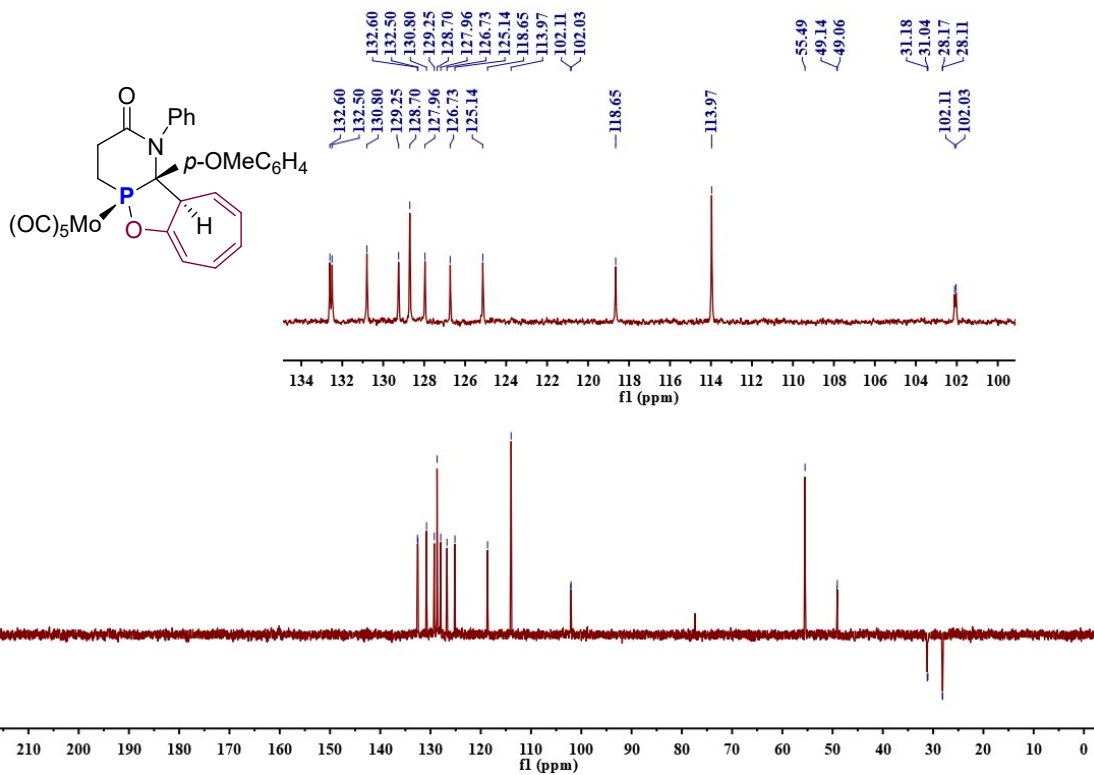

Dept 135 NMR (75 MHz, CDCl<sub>3</sub>) of Compound 2b'

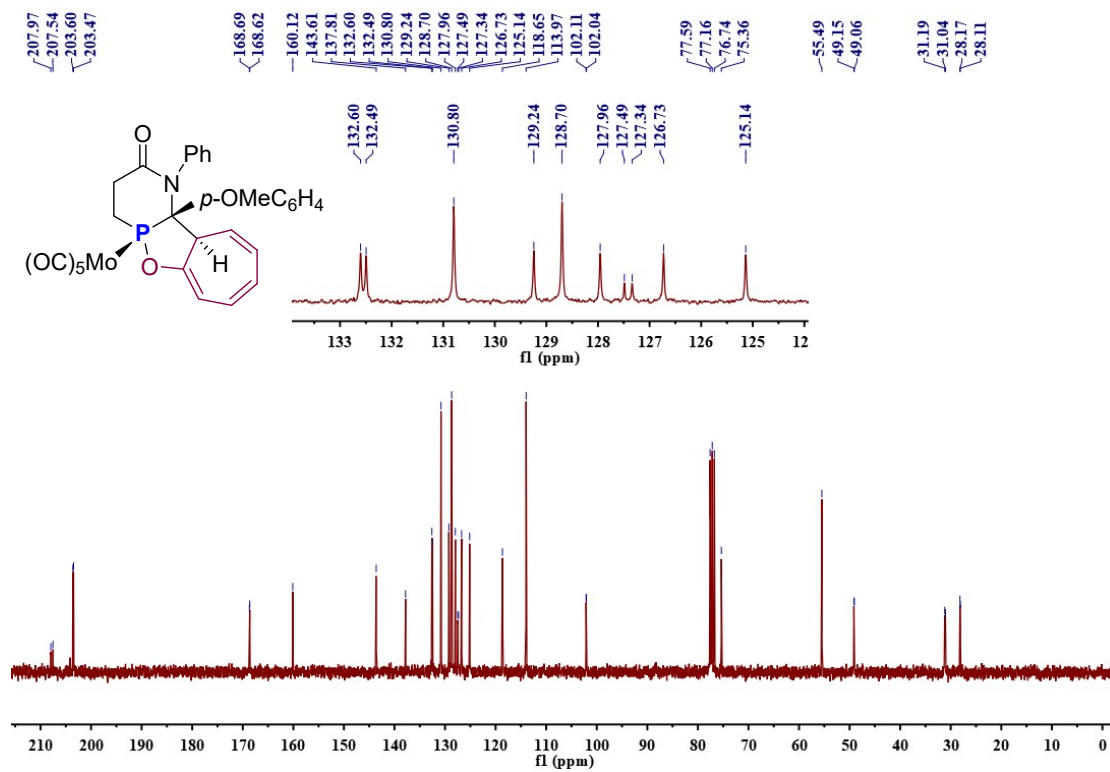

<sup>13</sup>C{<sup>1</sup>H} NMR (75 MHz, CDCl<sub>3</sub>) of Compound 2b'

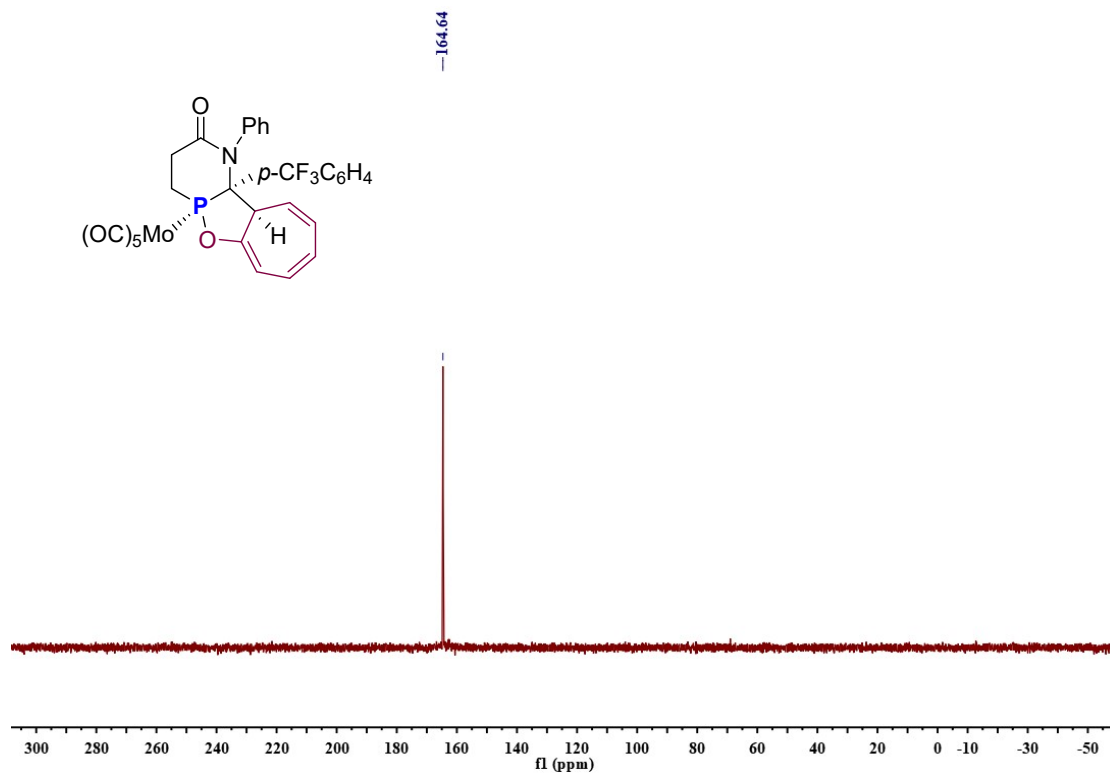

**$^{31}\text{P}\{^1\text{H}\}$  NMR (121 MHz,  $\text{CDCl}_3$ ) of Compound 2c**

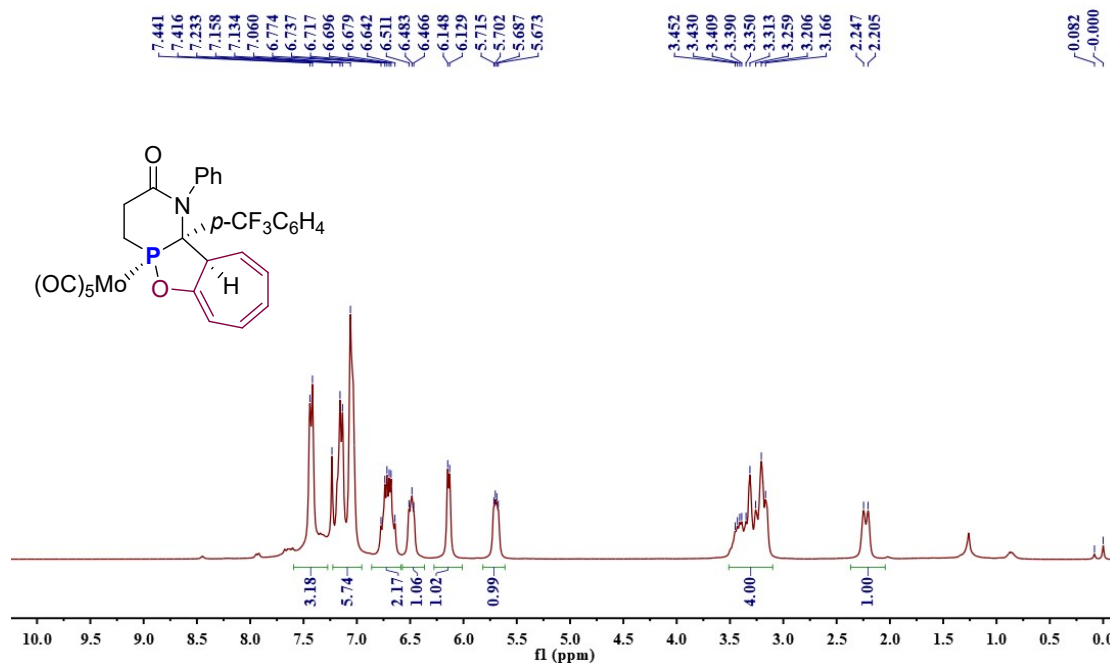

**$^1\text{H}$  NMR (300 MHz,  $\text{CDCl}_3$ ) of Compound 2c**

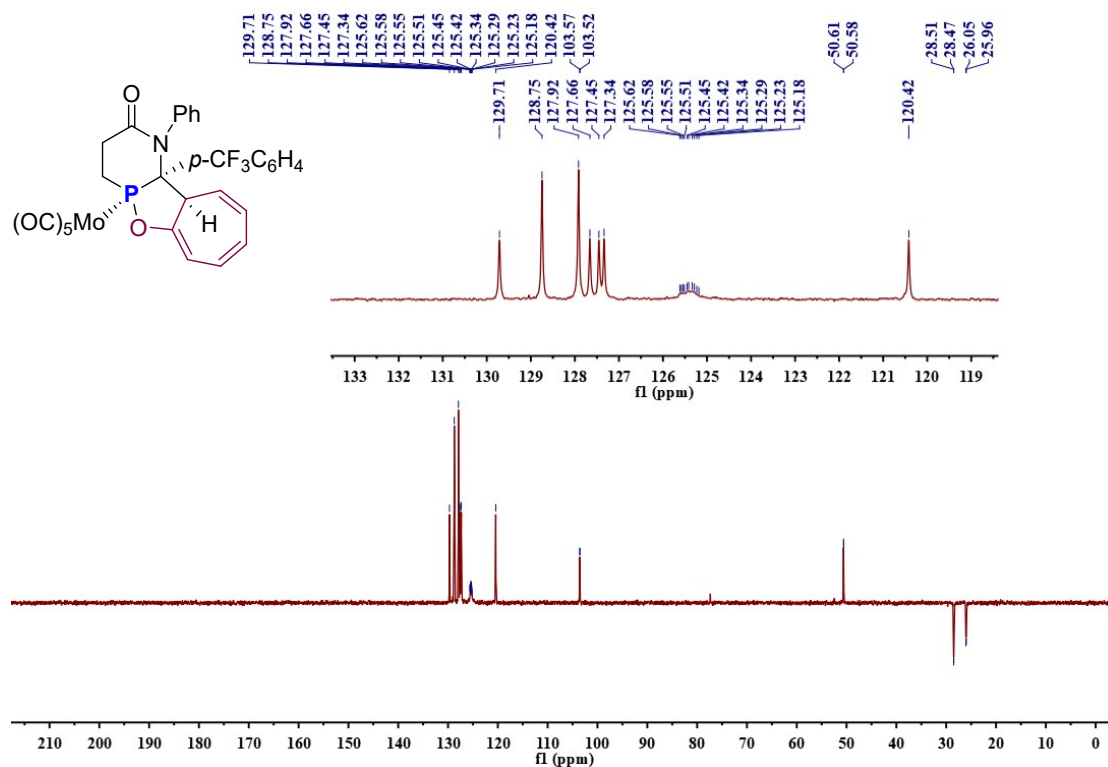

**Dept 135 NMR (75 MHz, CDCl<sub>3</sub>) of Compound 2c**

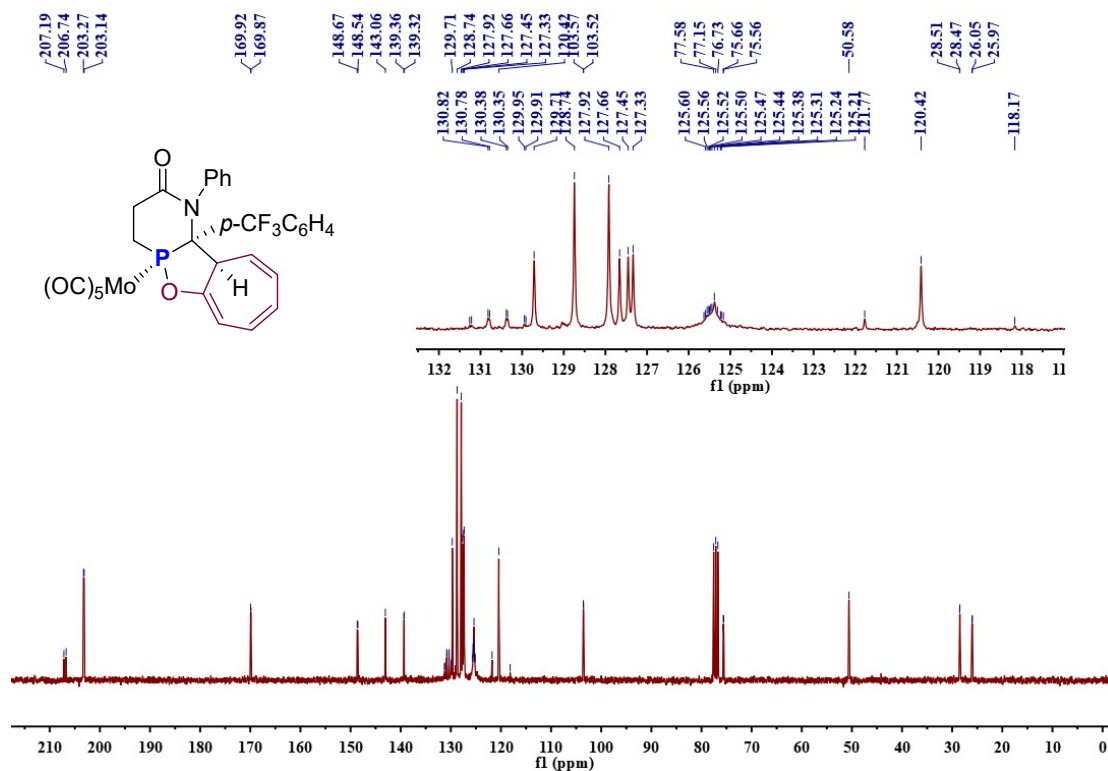

**<sup>13</sup>C{<sup>1</sup>H} NMR (75 MHz, CDCl<sub>3</sub>) of Compound 2c**



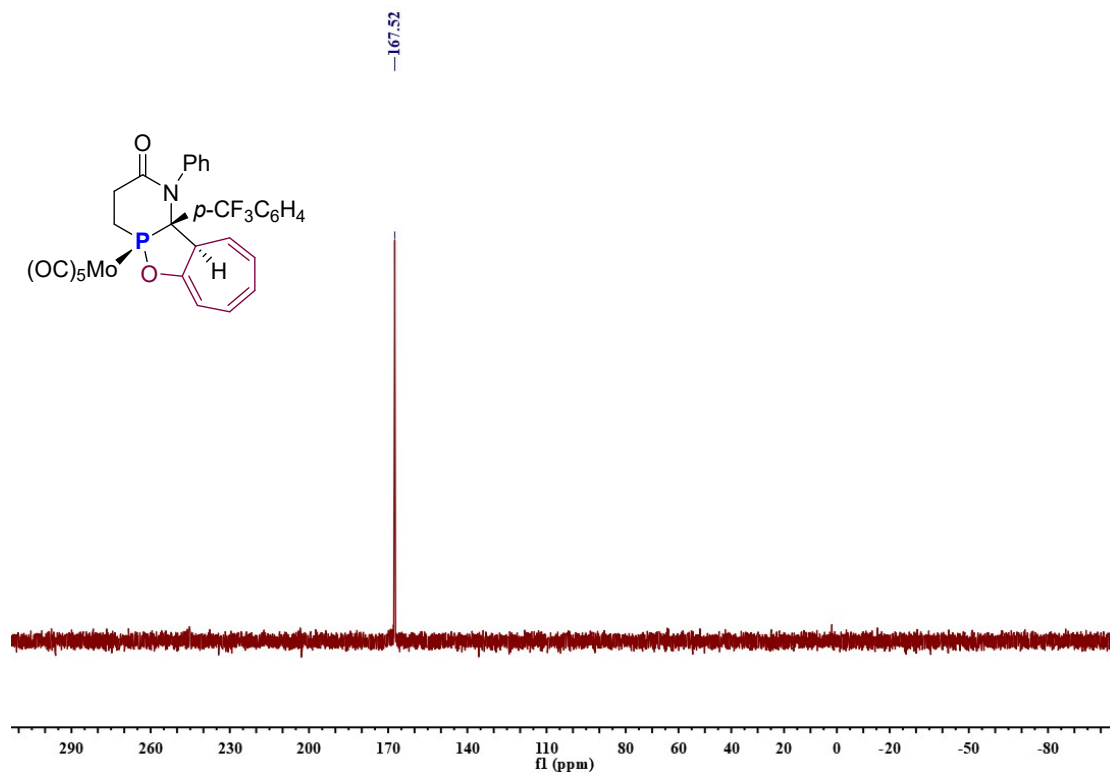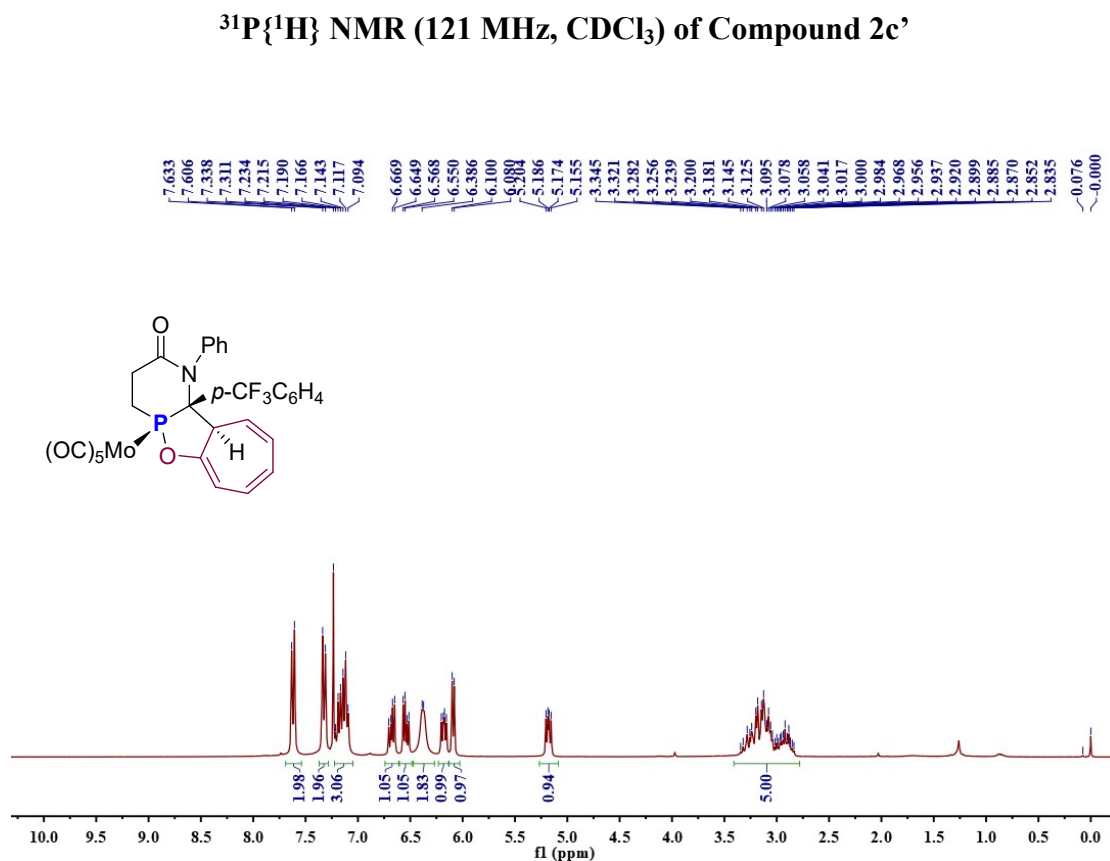

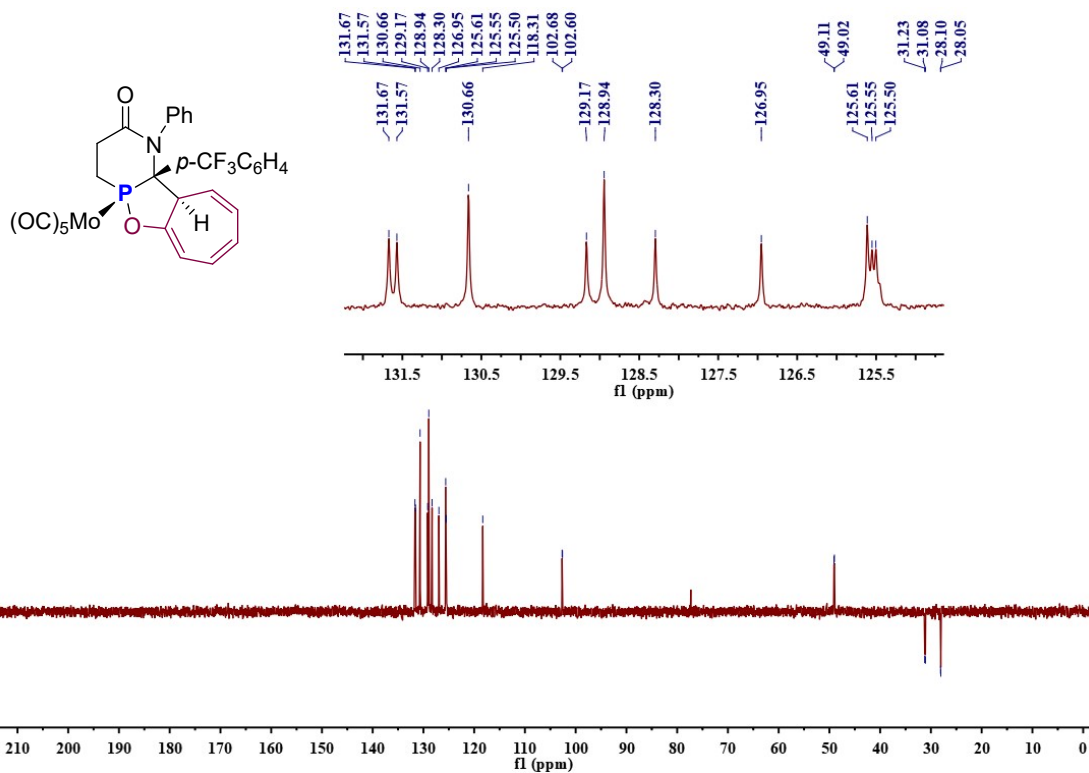

Dept 135 NMR (75 MHz,  $CDCl_3$ ) of Compound 2c'

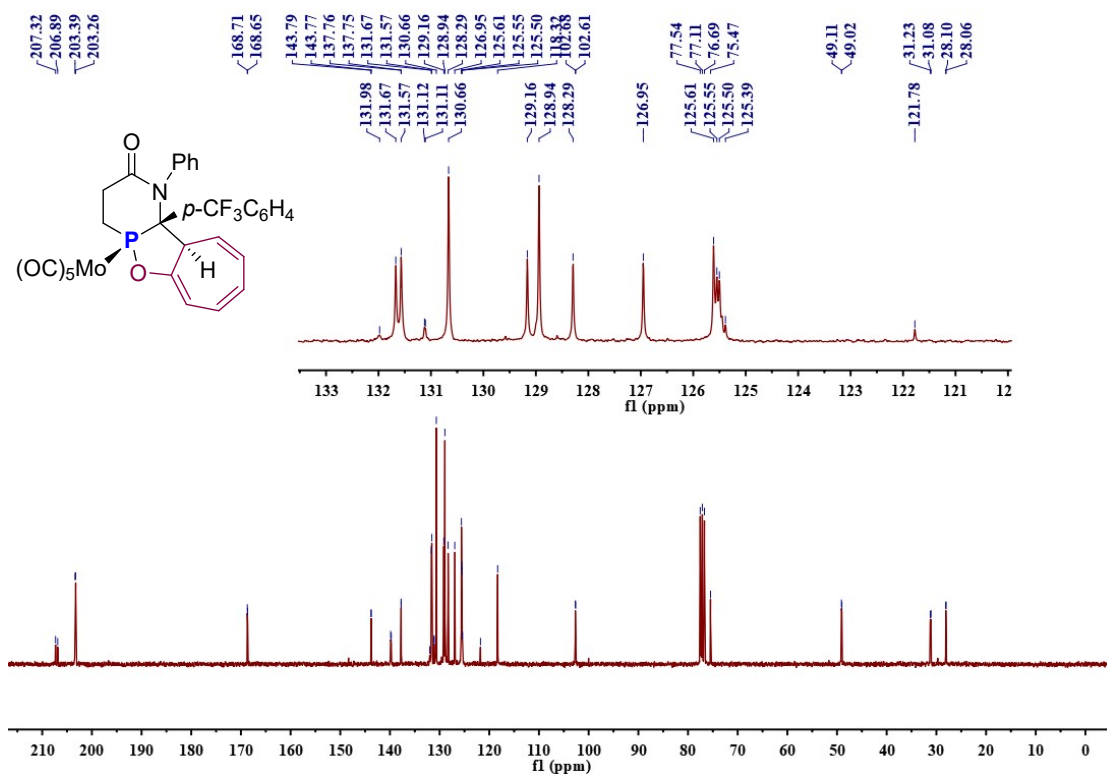

$^{13}C\{^1H\}$  NMR (75 MHz,  $CDCl_3$ ) of Compound 2c'

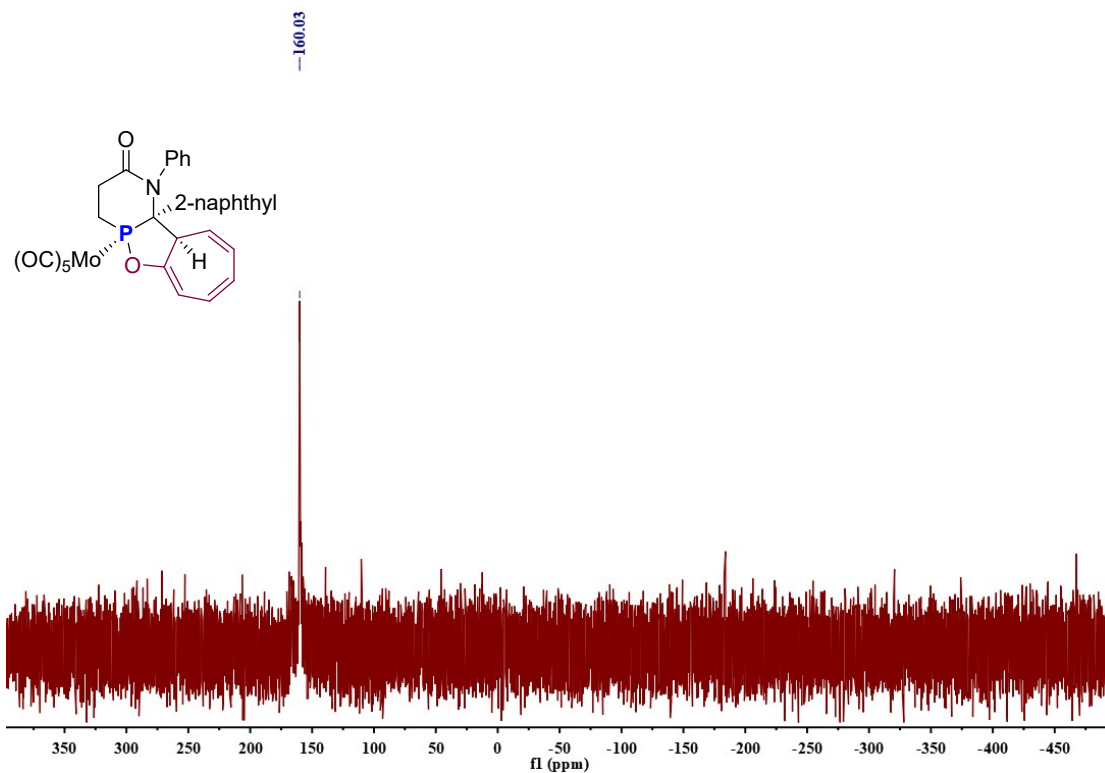

**$^{31}\text{P}\{^1\text{H}\}$  NMR (121 MHz,  $\text{CDCl}_3$ ) of Compound 2d**

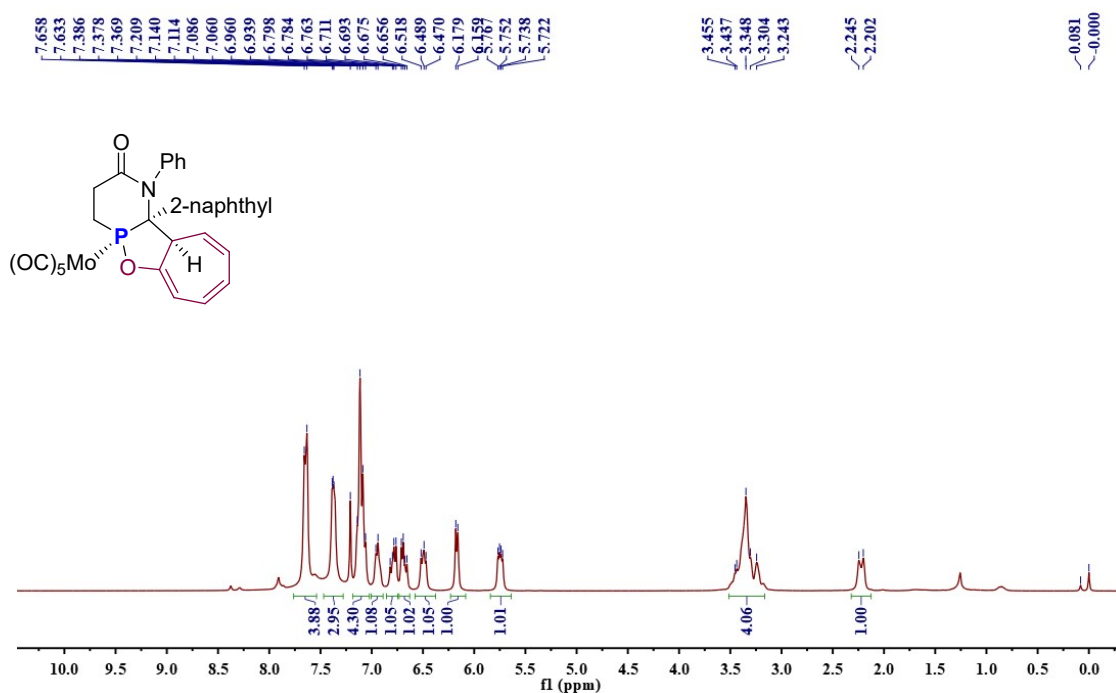

**$^1\text{H}$  NMR (300 MHz,  $\text{CDCl}_3$ ) of Compound 2d**

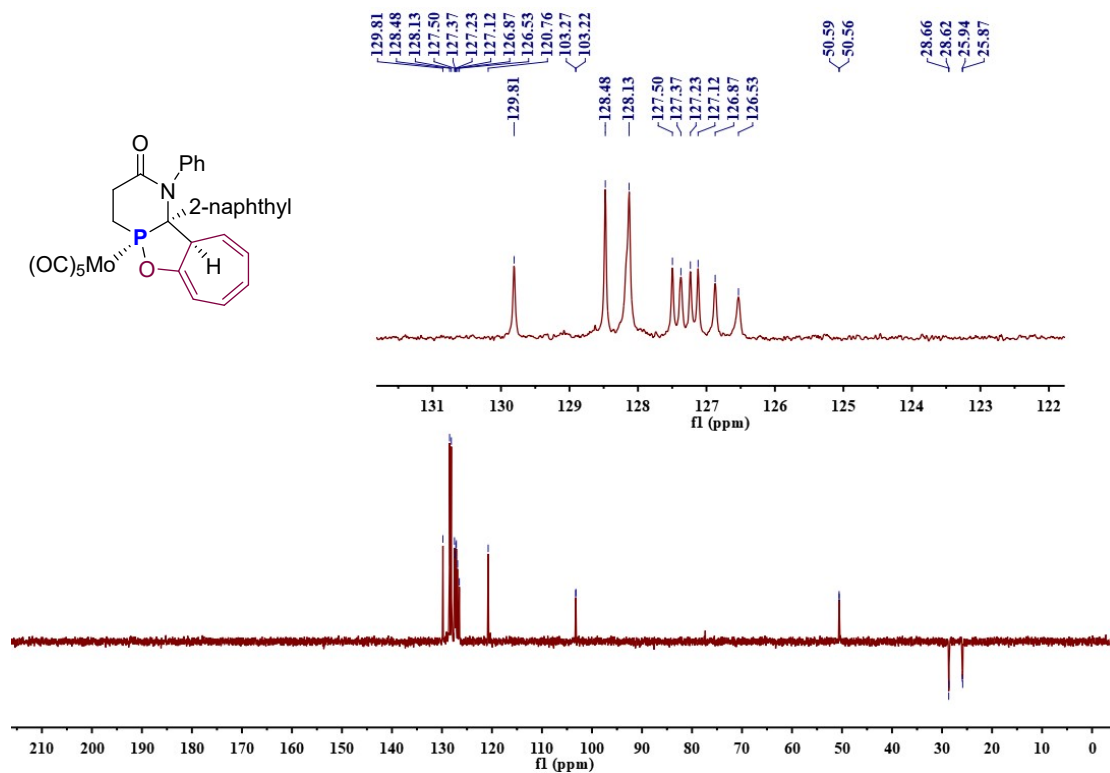

**$^{13}\text{C}$  NMR (75 MHz,  $\text{CDCl}_3$ ) of Compound 2d**

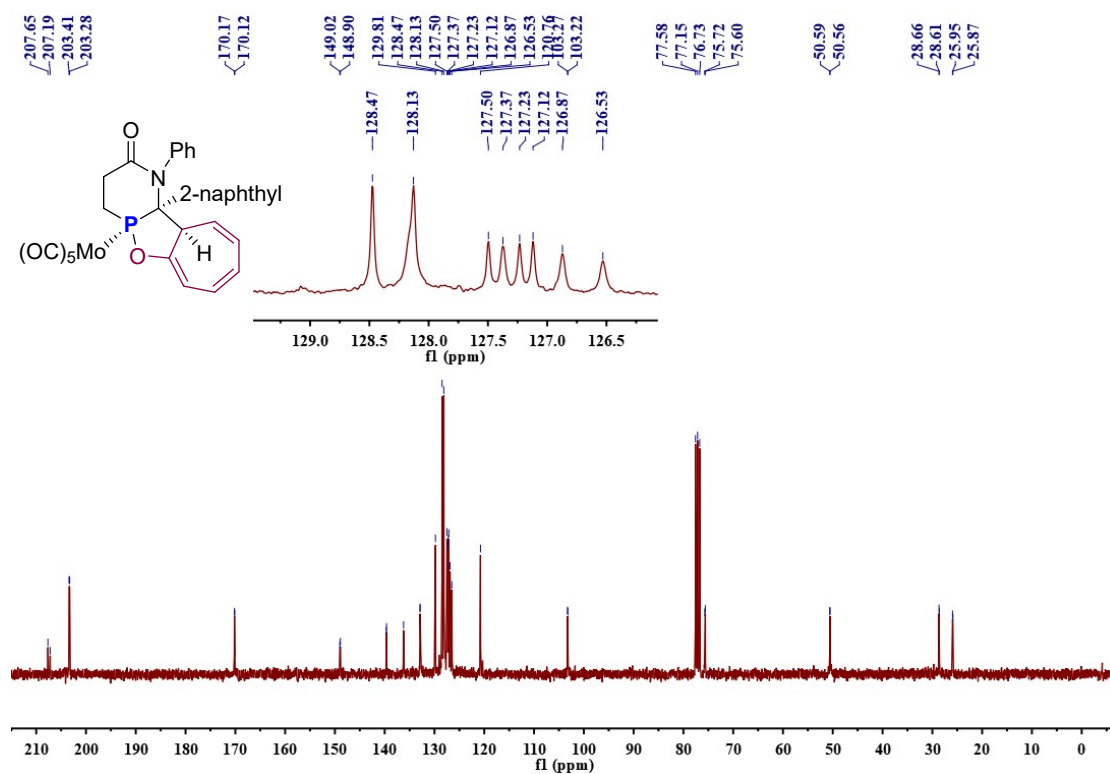

**$^{13}\text{C}\{^1\text{H}\}$  NMR (75 MHz,  $\text{CDCl}_3$ ) of Compound 2d**

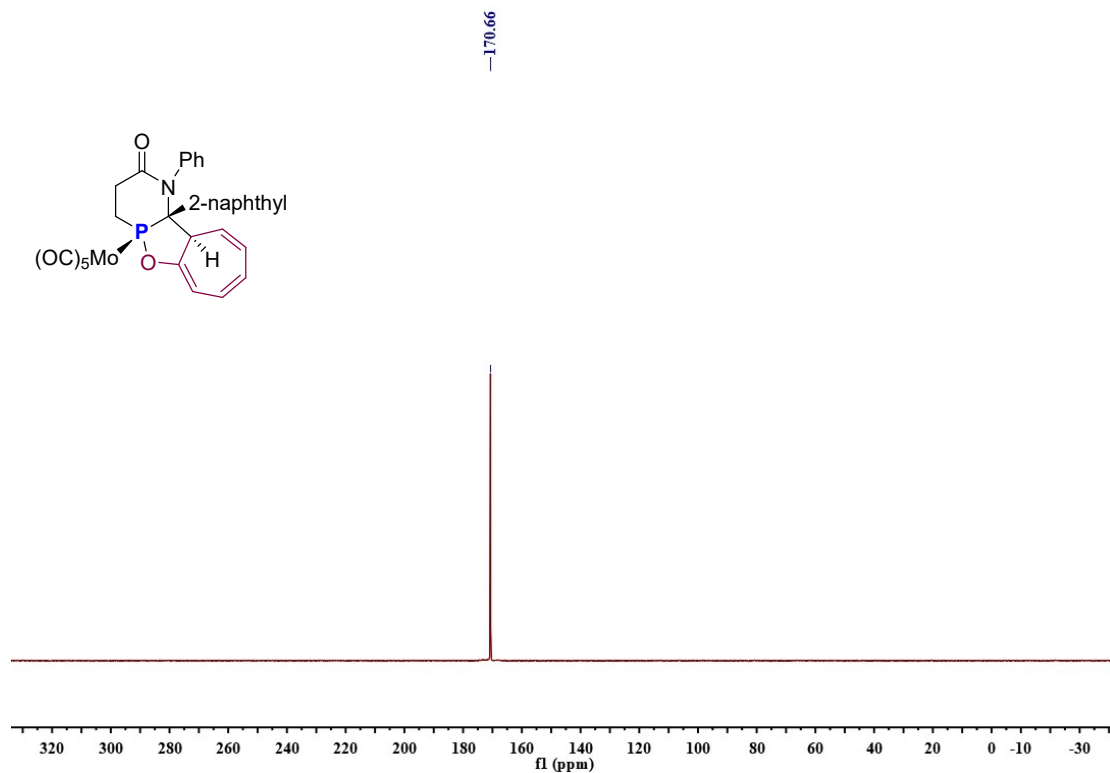

**$^{31}\text{P}\{^1\text{H}\}$  NMR (121 MHz,  $\text{CDCl}_3$ ) of Compound 2d'**

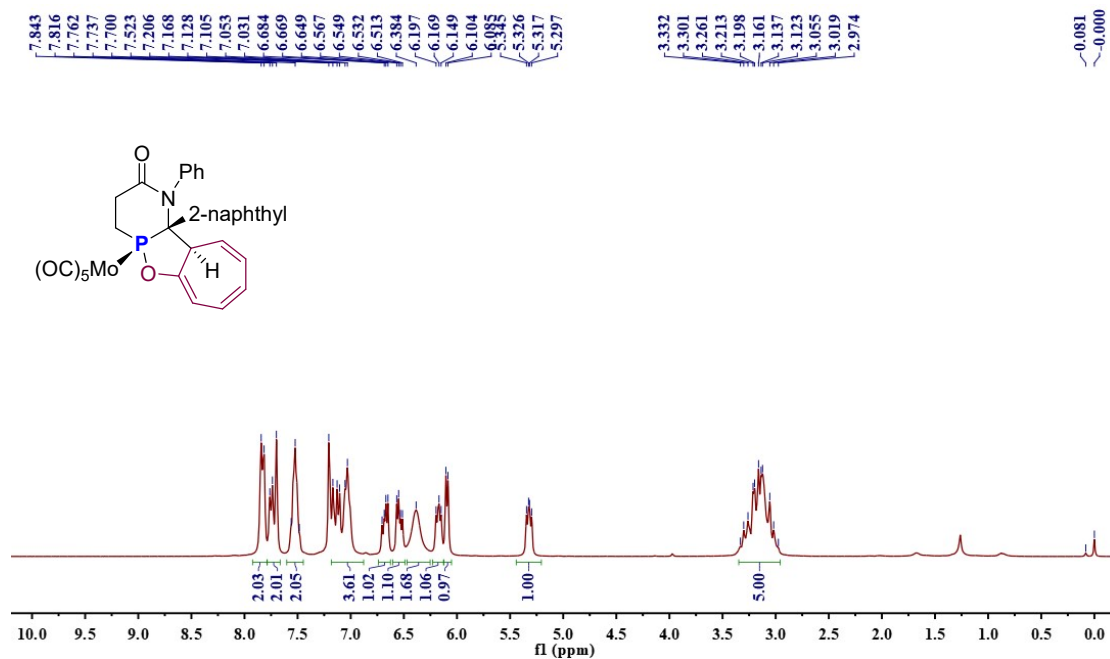

**$^1\text{H}$  NMR (300 MHz,  $\text{CDCl}_3$ ) of Compound 2d'**

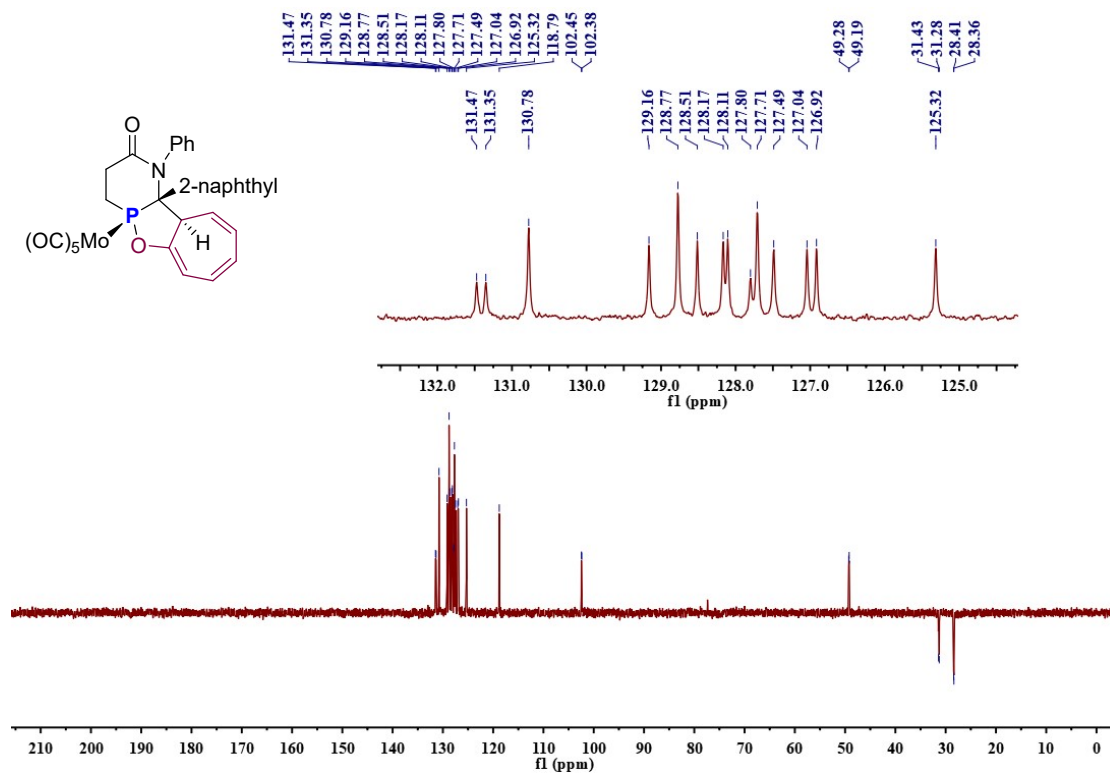

Dept 135 NMR (75 MHz, CDCl<sub>3</sub>) of Compound 2d'

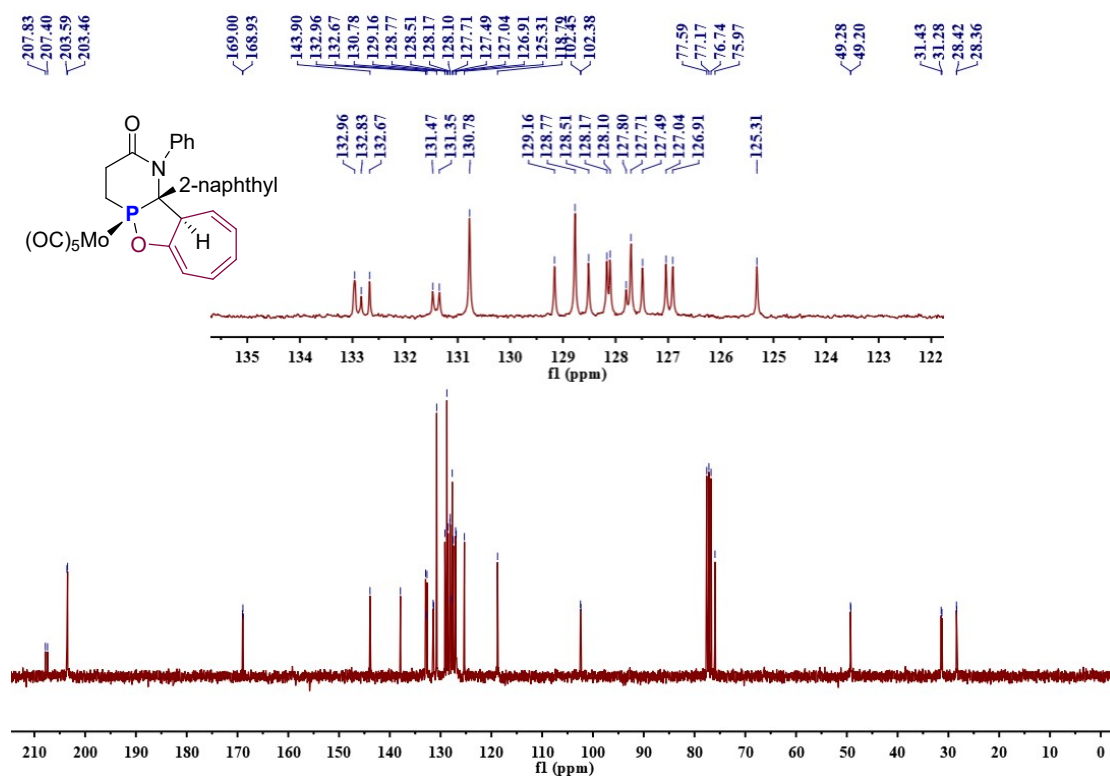

<sup>13</sup>C{<sup>1</sup>H} NMR (75 MHz, CDCl<sub>3</sub>) of Compound 2d'

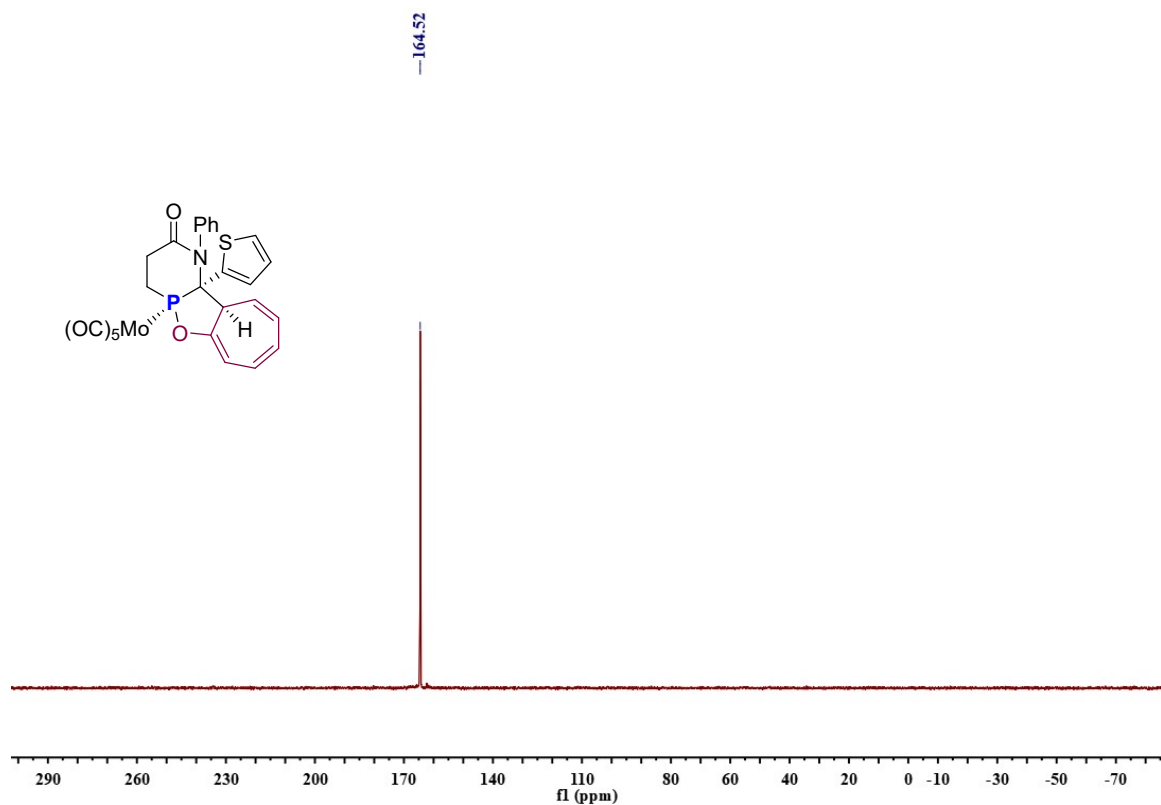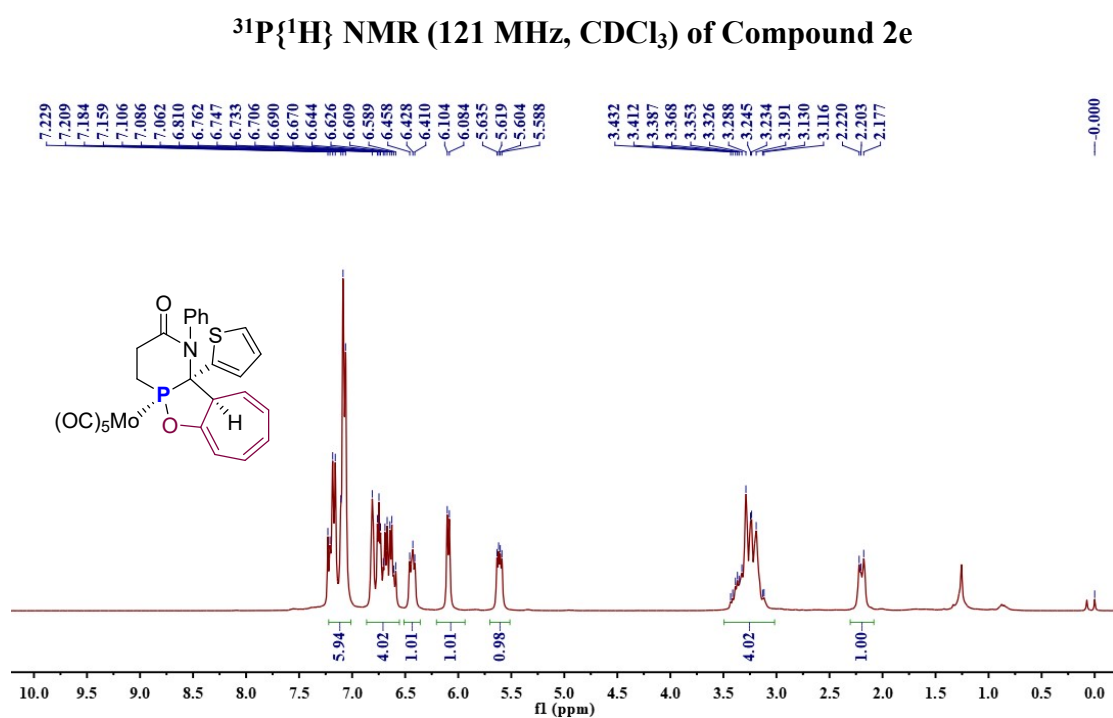

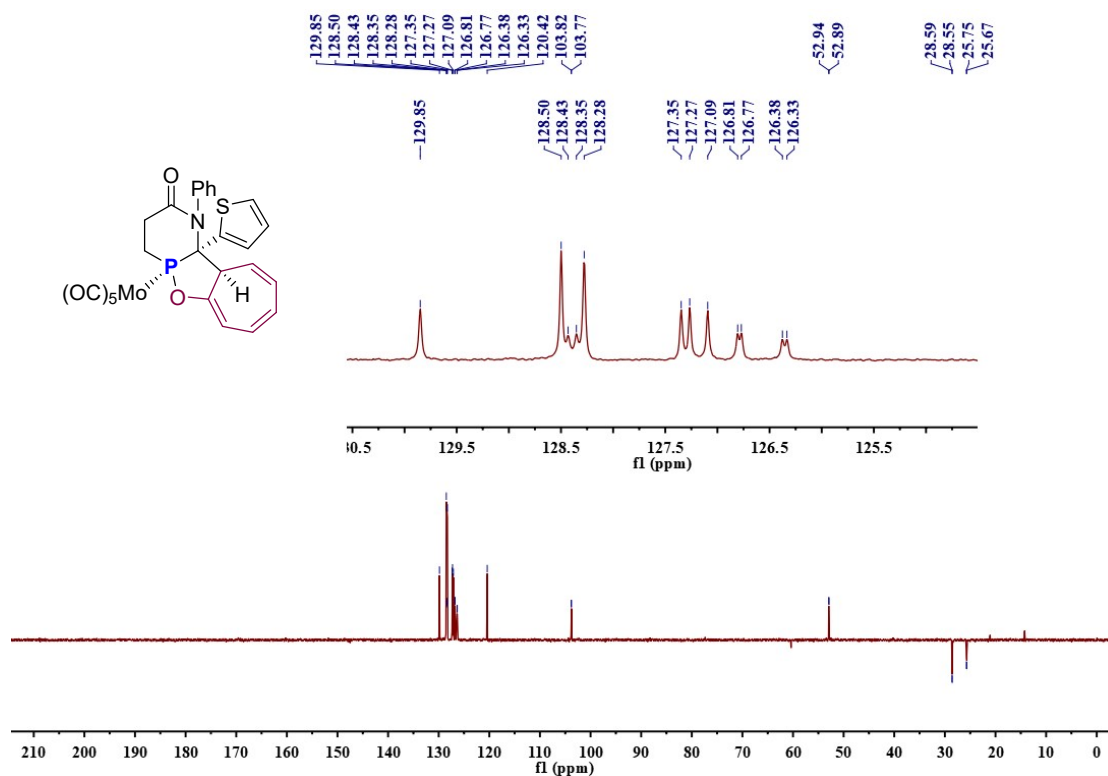

Dept 135 NMR (75 MHz,  $\text{CDCl}_3$ ) of Compound 2e

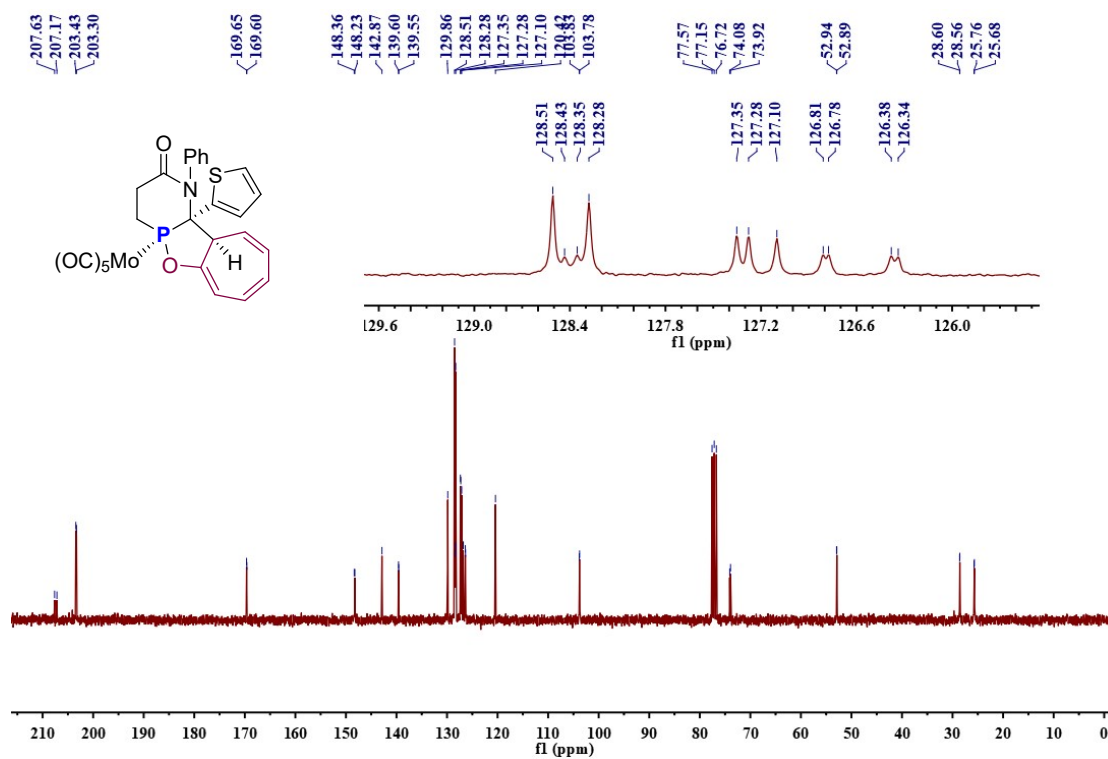

$^{13}\text{C}\{^1\text{H}\}$  NMR (75 MHz,  $\text{CDCl}_3$ ) of Compound 2e



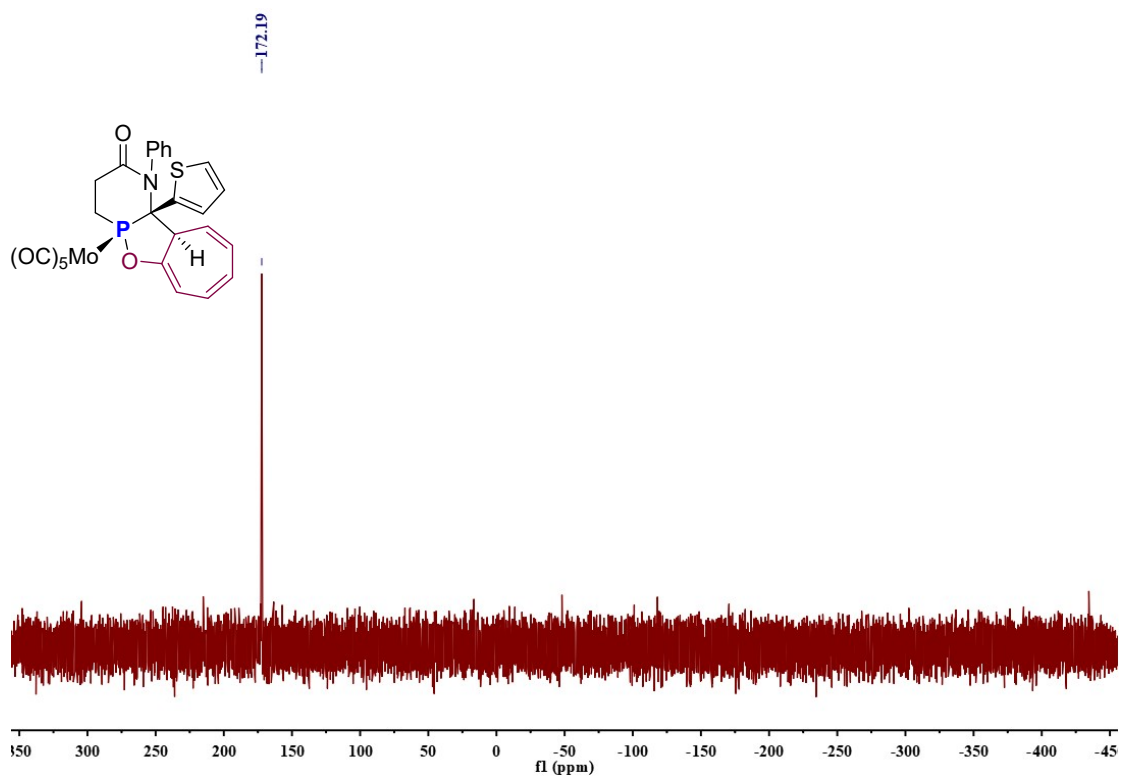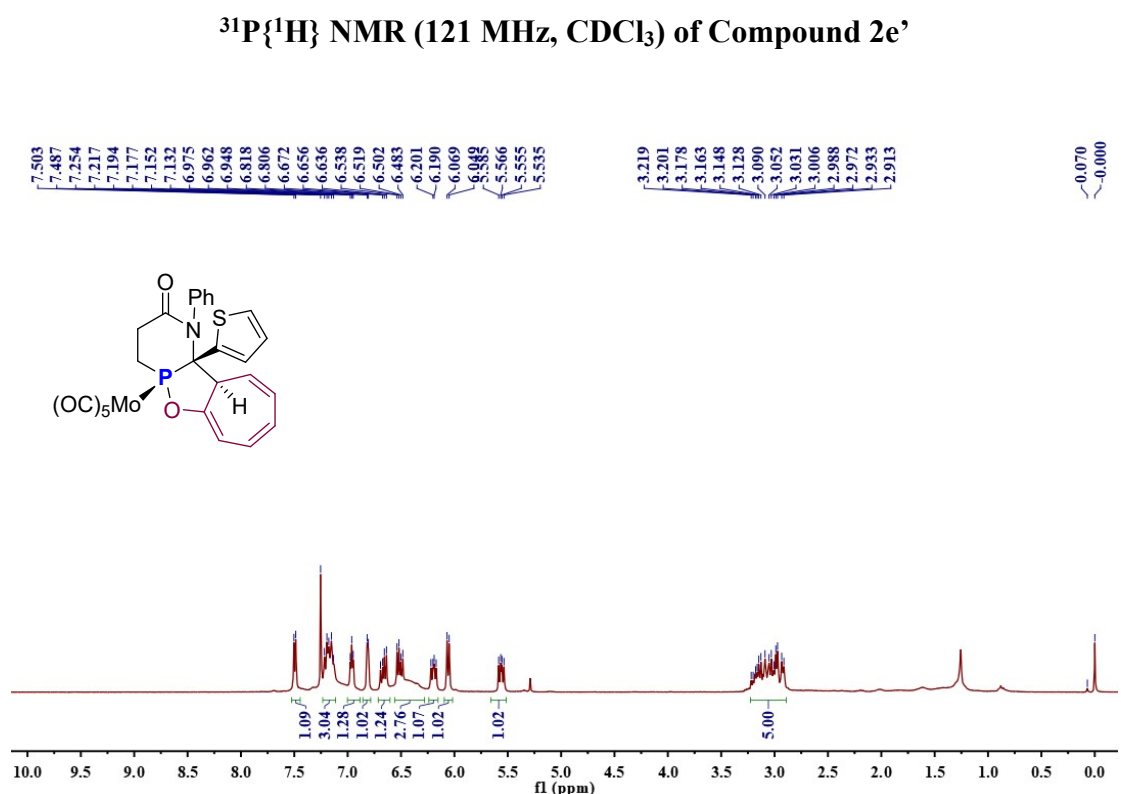

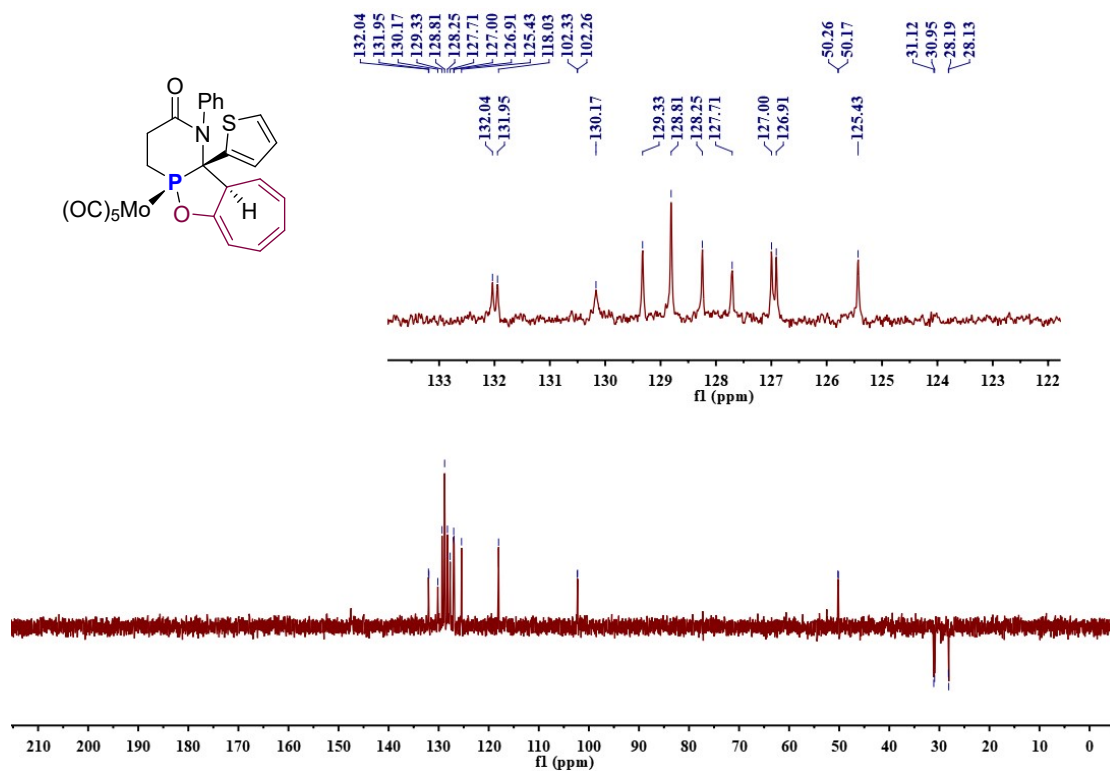

Dept 135 NMR (75 MHz, CDCl<sub>3</sub>) of Compound 2e'

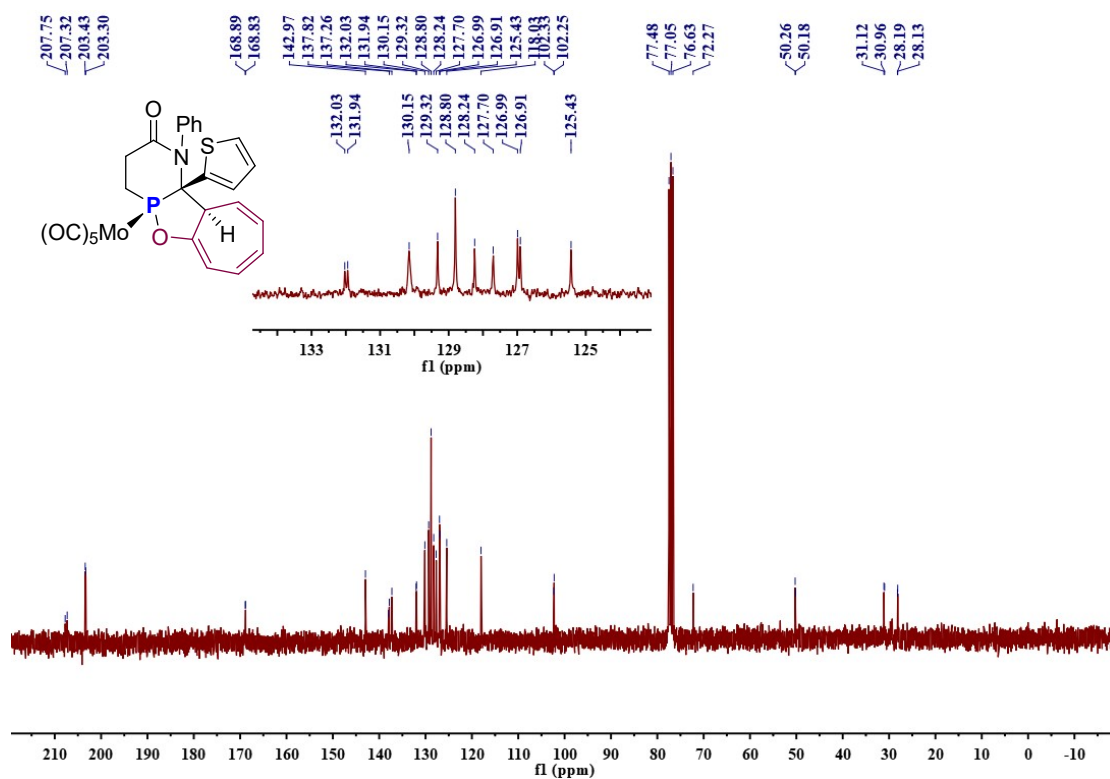

<sup>13</sup>C{<sup>1</sup>H} NMR (75 MHz, CDCl<sub>3</sub>) of Compound 2e'

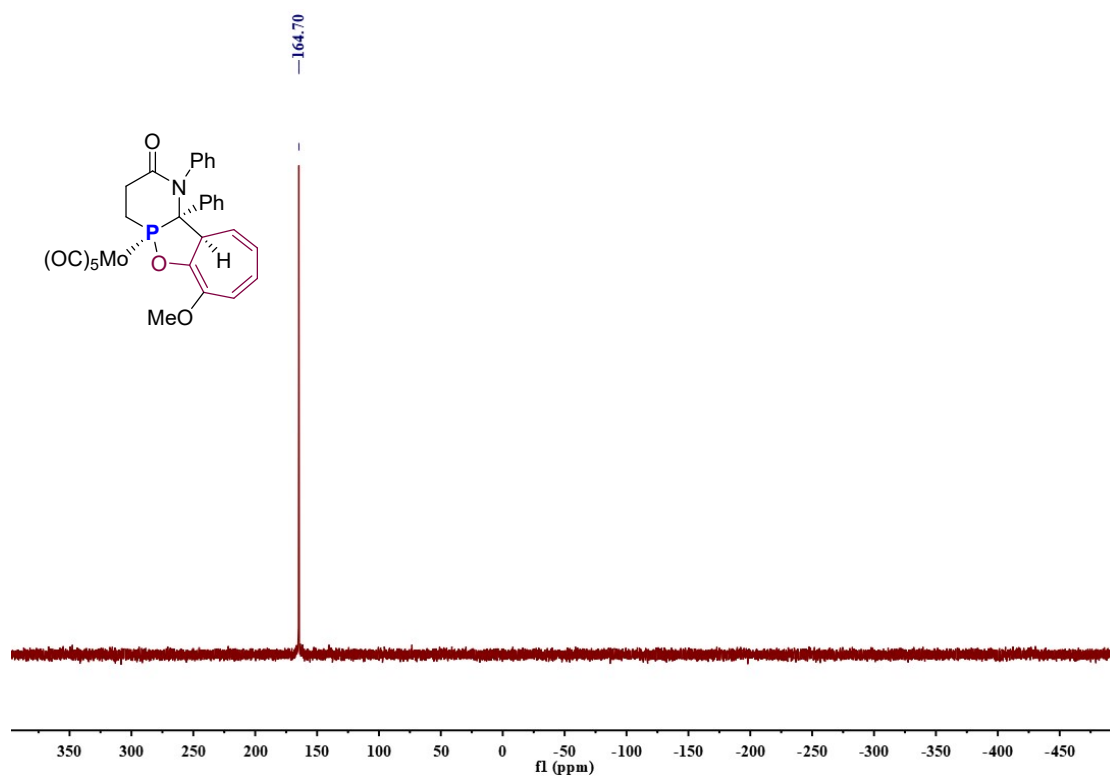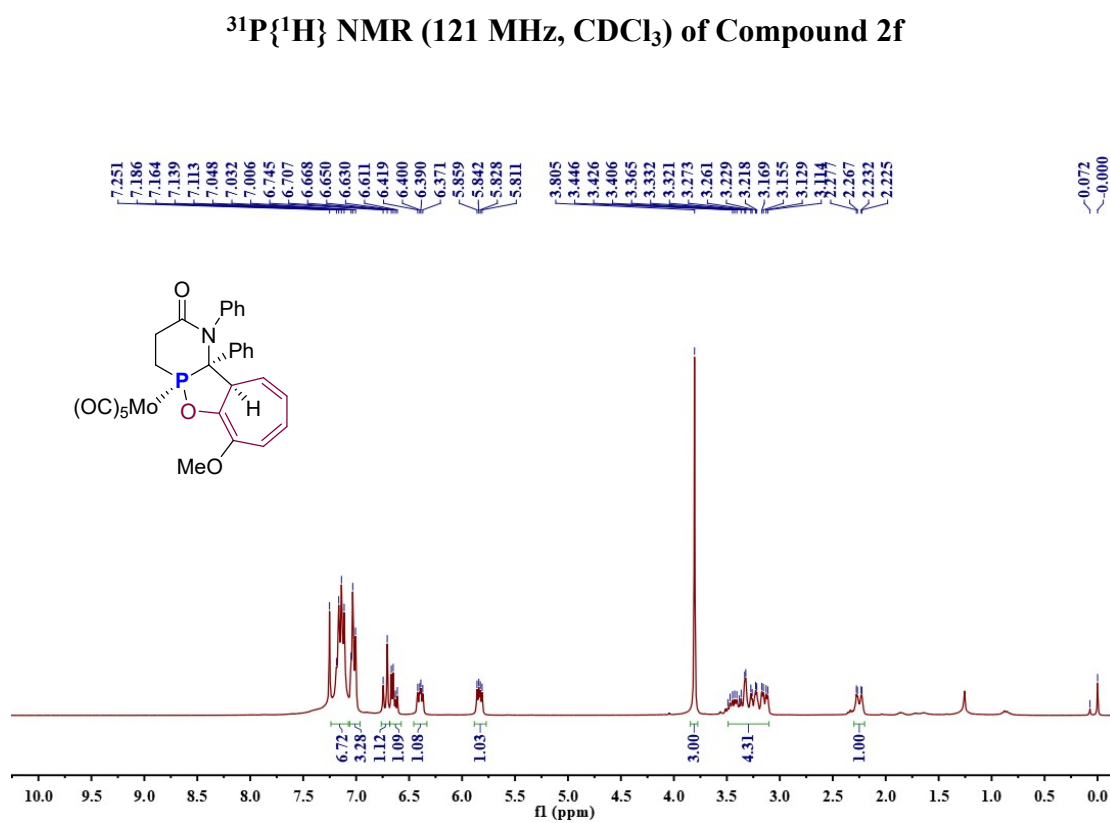

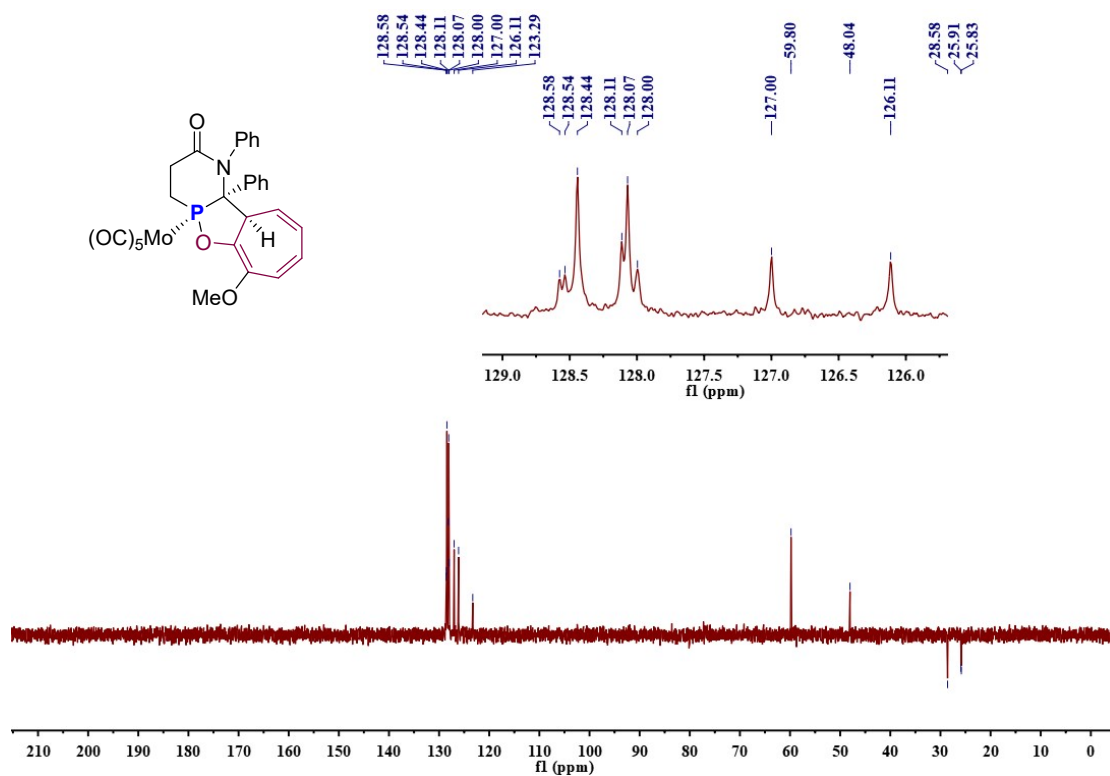

Dept 135 NMR (75 MHz, CDCl<sub>3</sub>) of Compound 2f

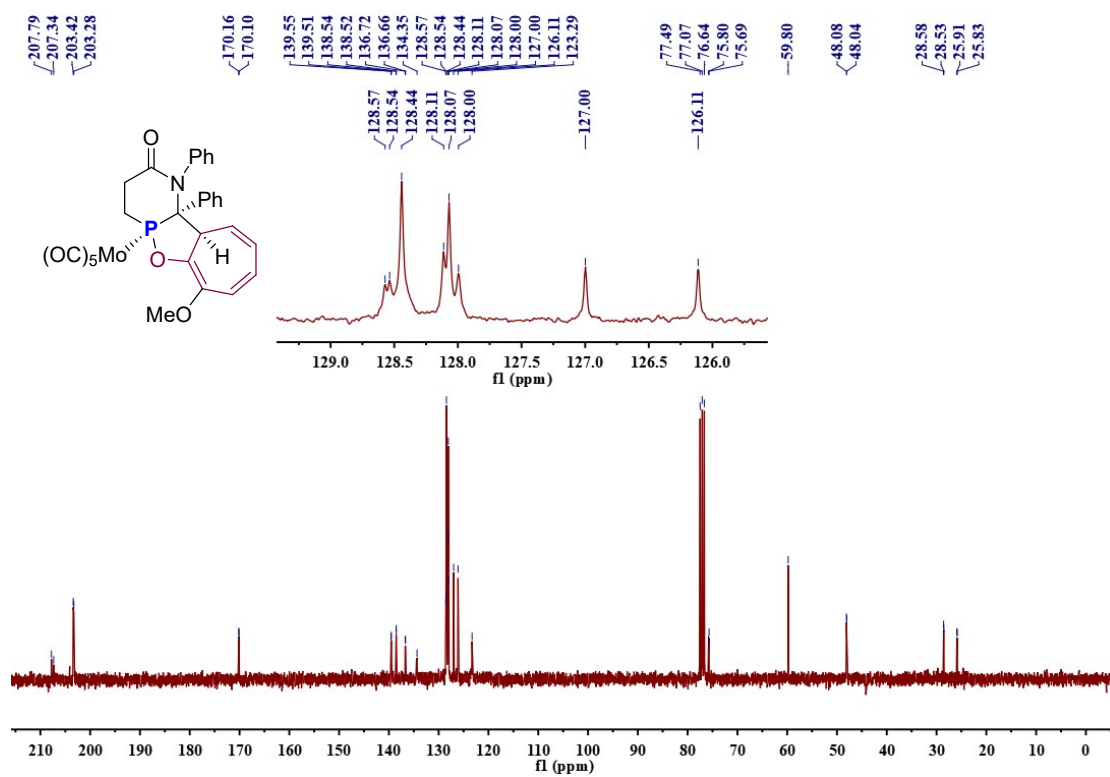

<sup>13</sup>C{<sup>1</sup>H} NMR (75 MHz, CDCl<sub>3</sub>) of Compound 2f

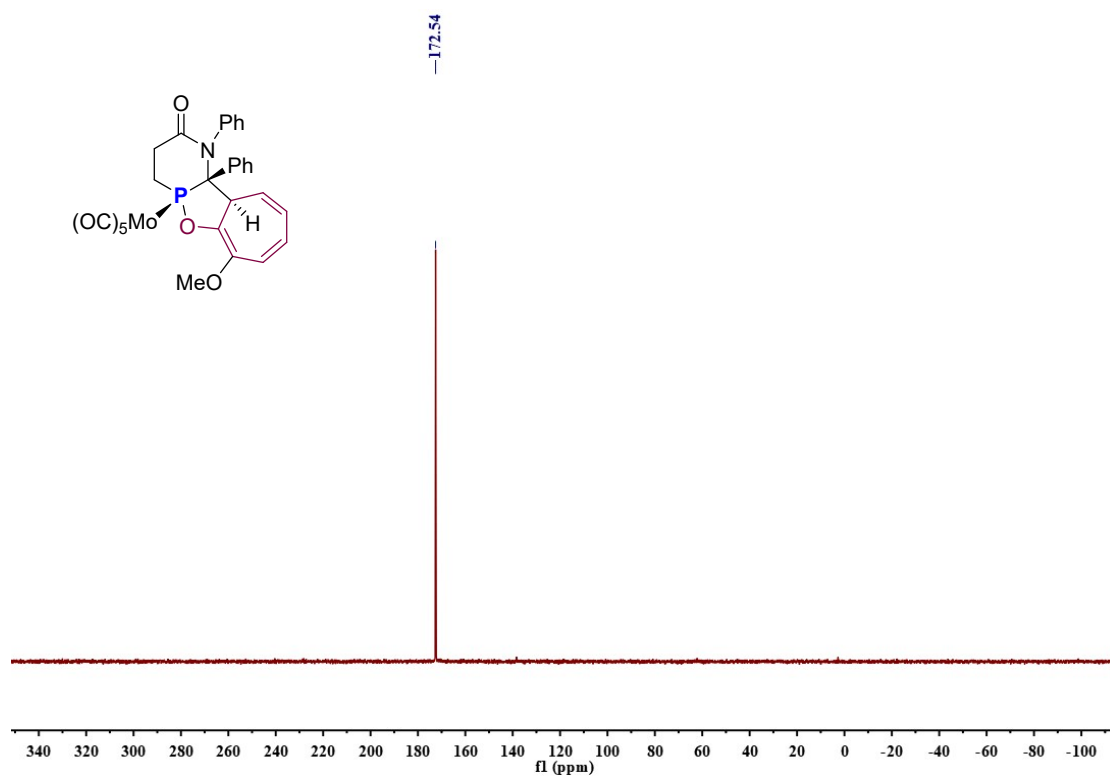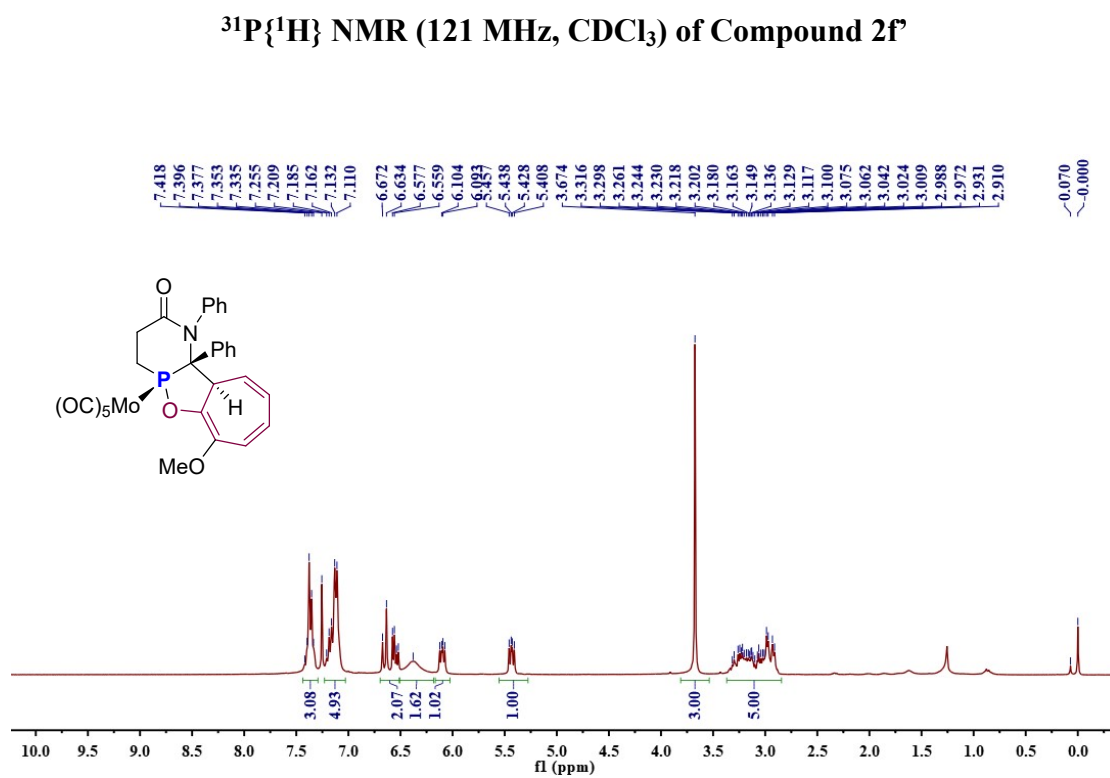



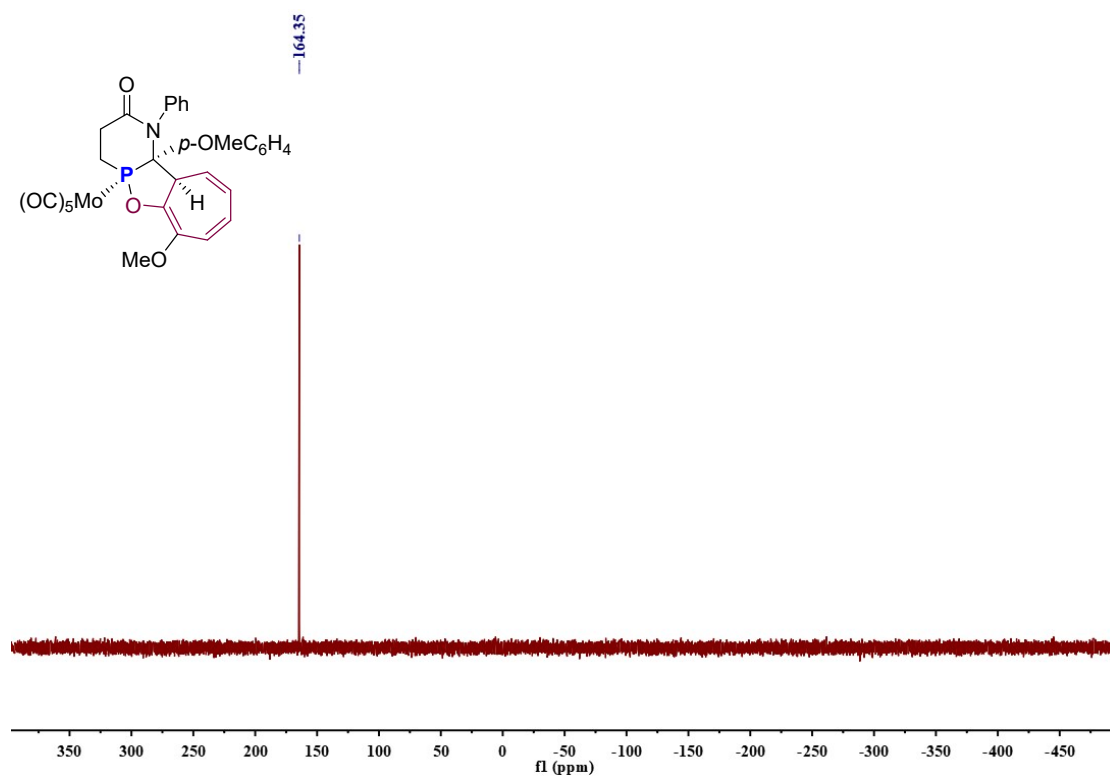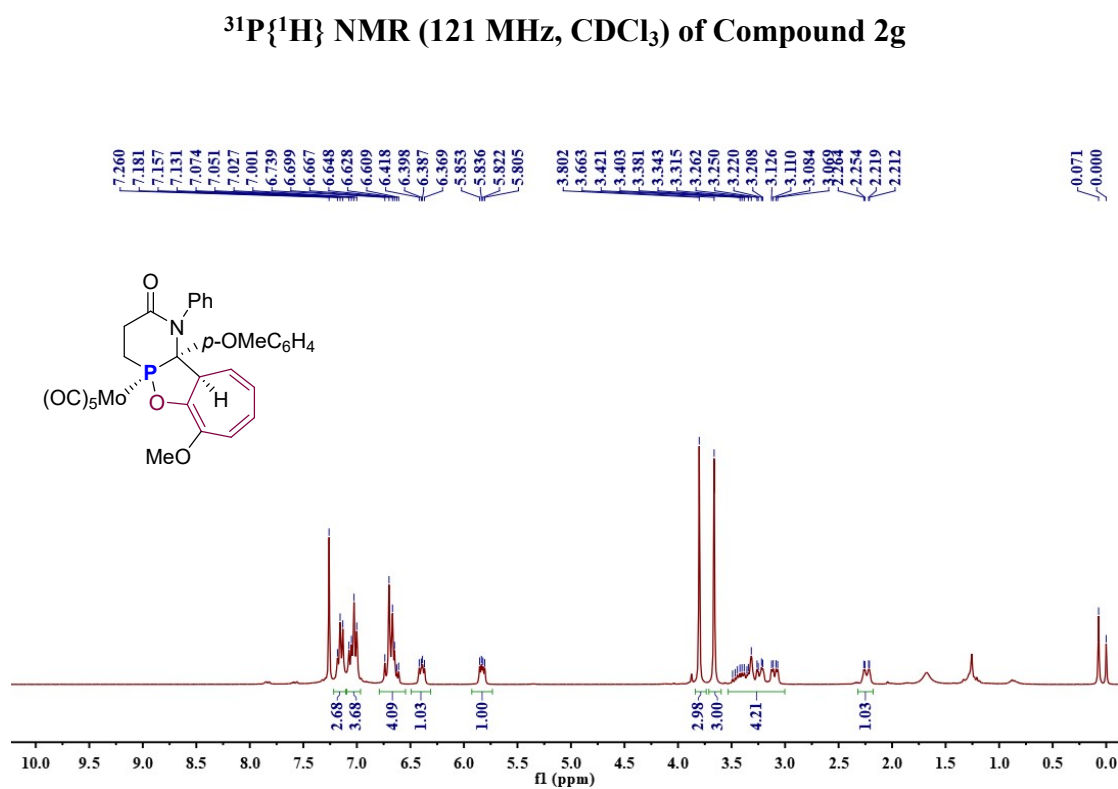

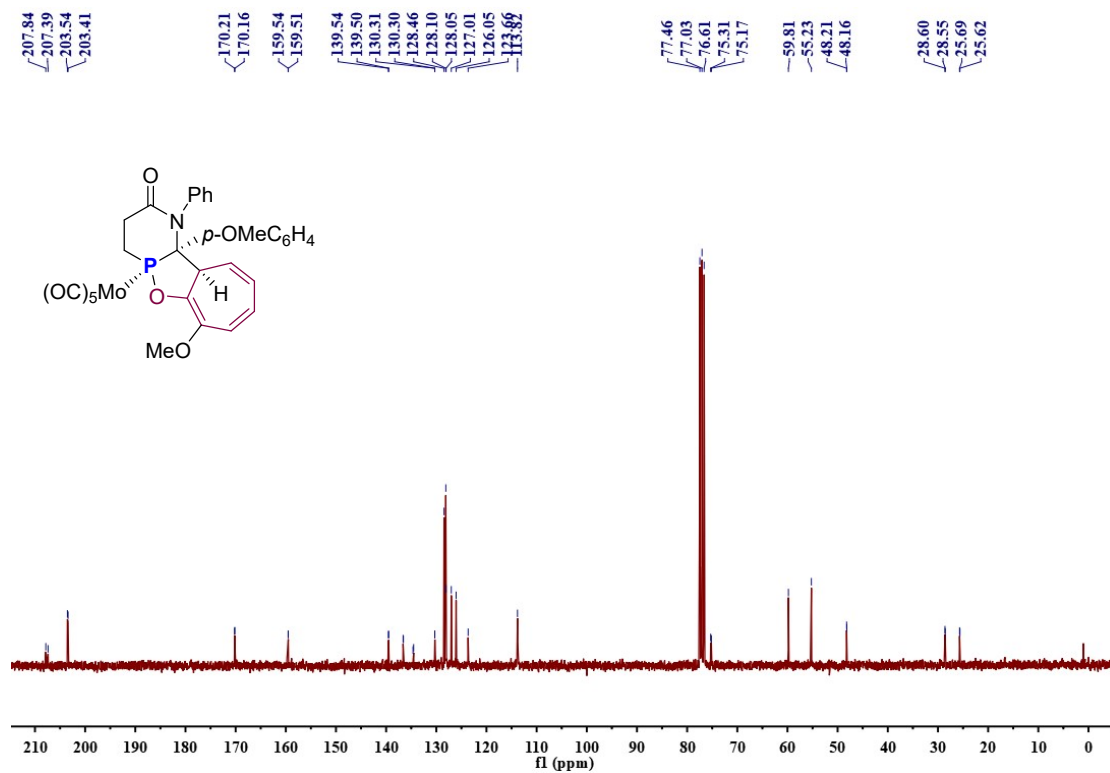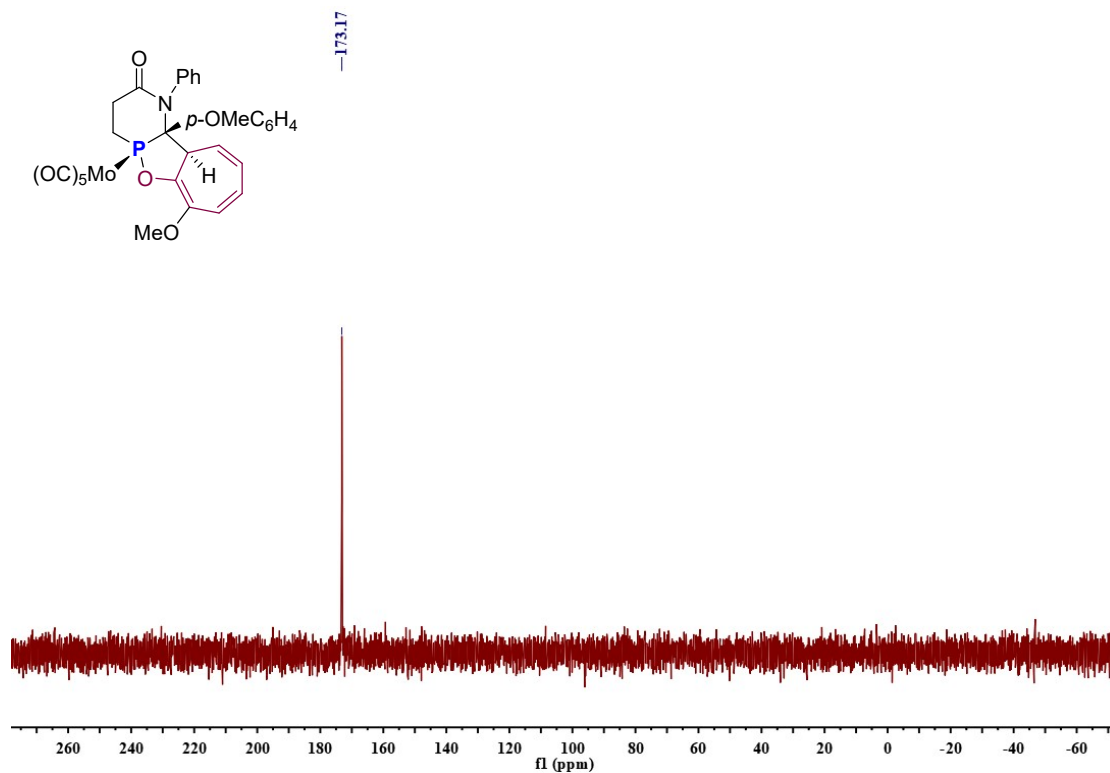



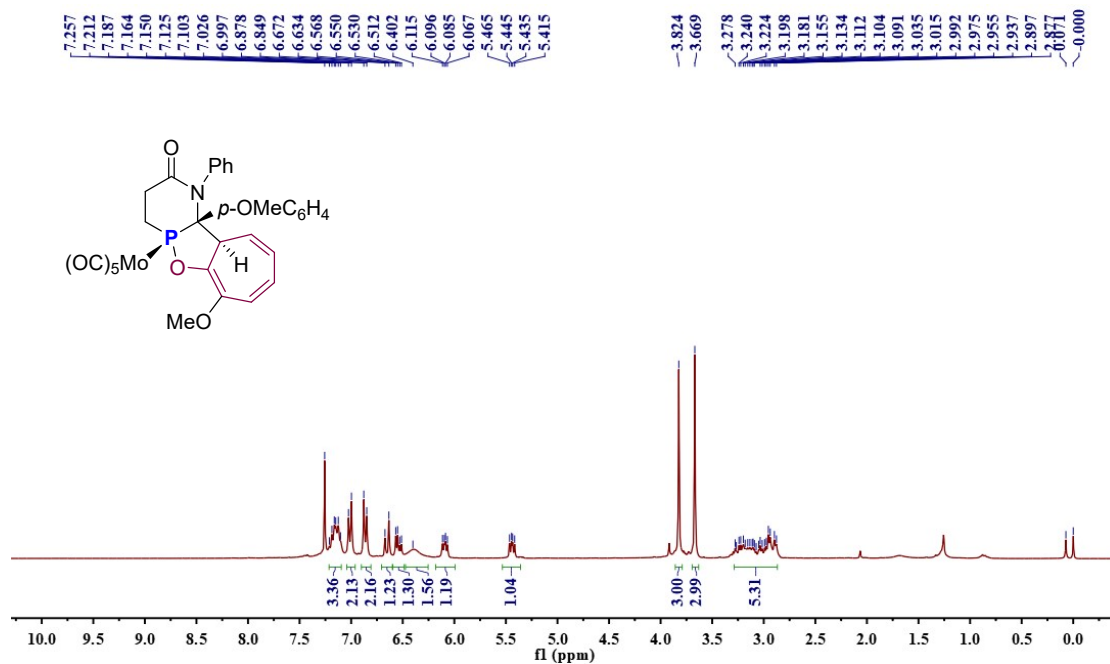

<sup>1</sup>H NMR (300 MHz, CDCl<sub>3</sub>) of Compound 2g'

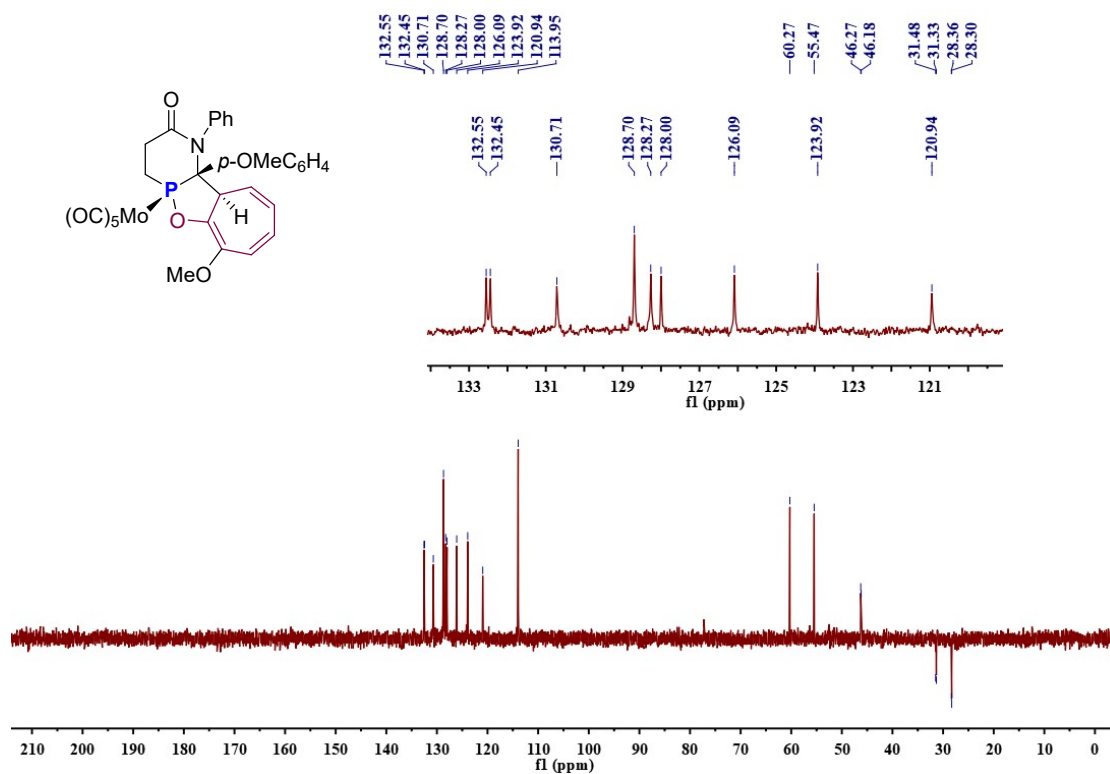

<sup>13</sup>C NMR (75 MHz, CDCl<sub>3</sub>) of Compound 2g'

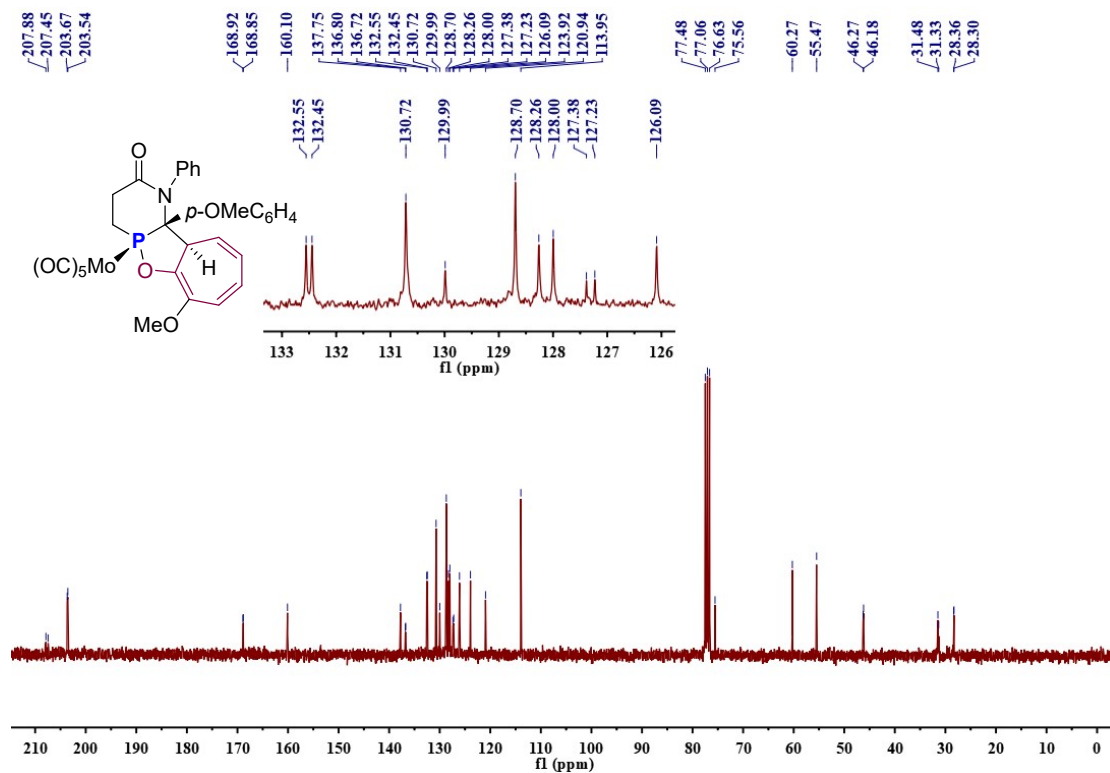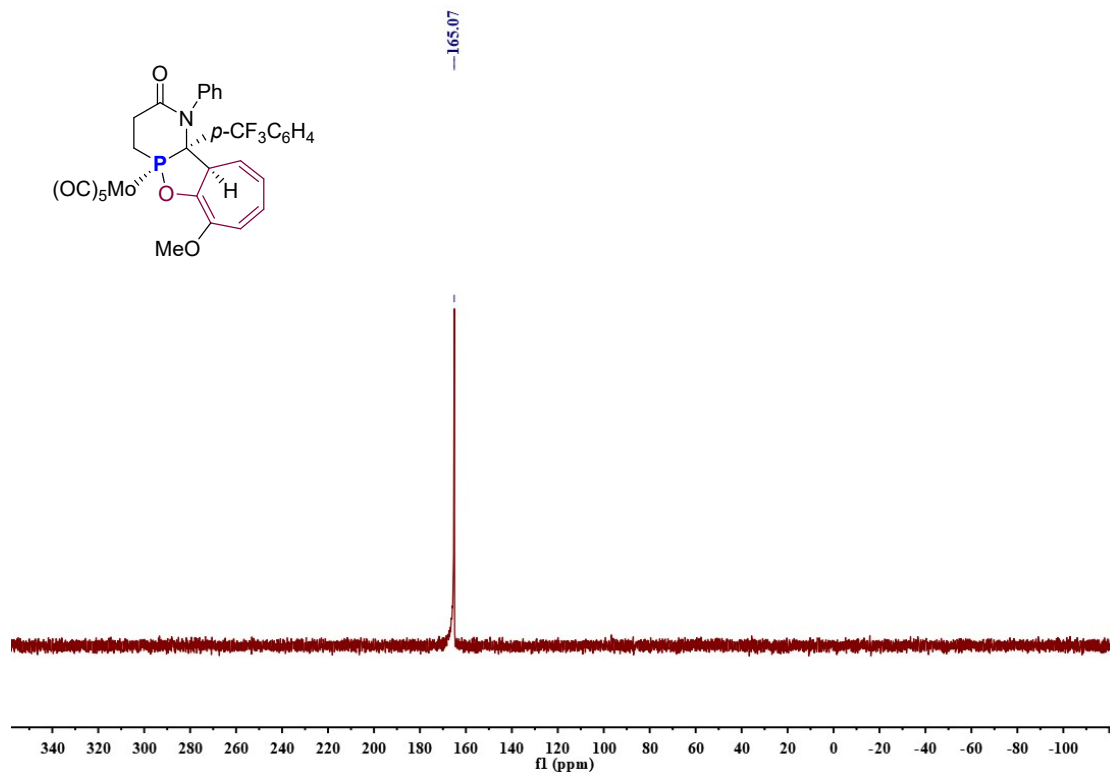

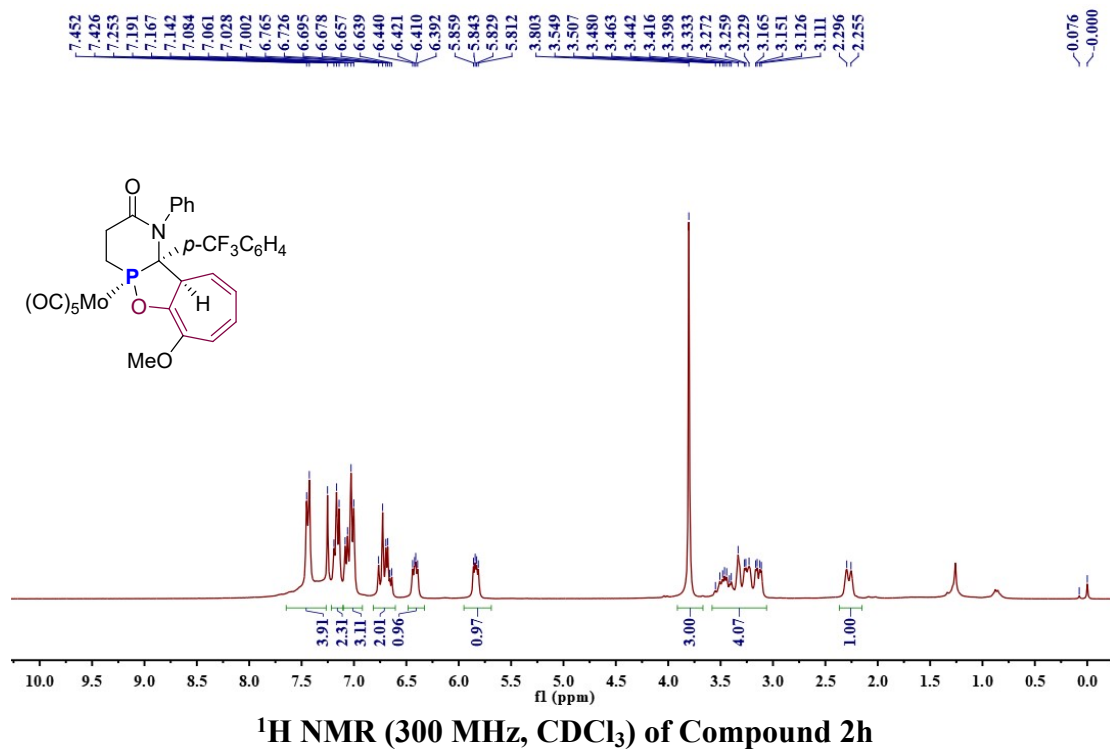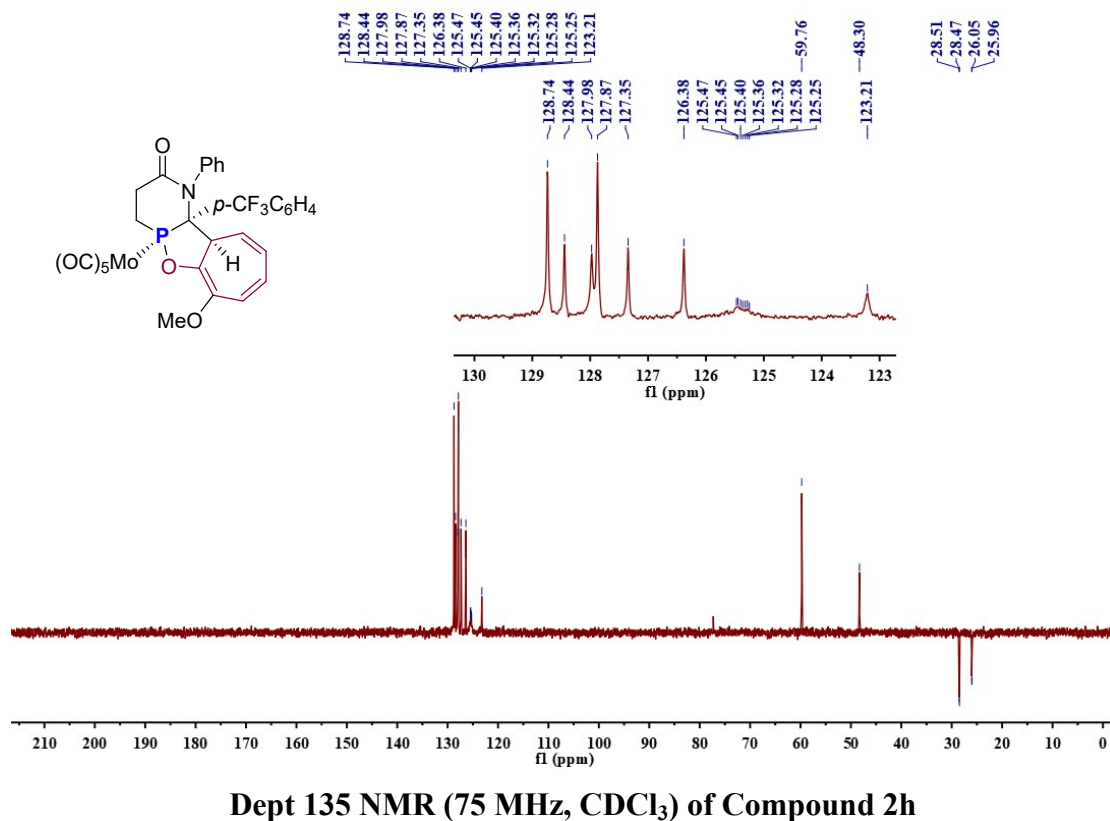

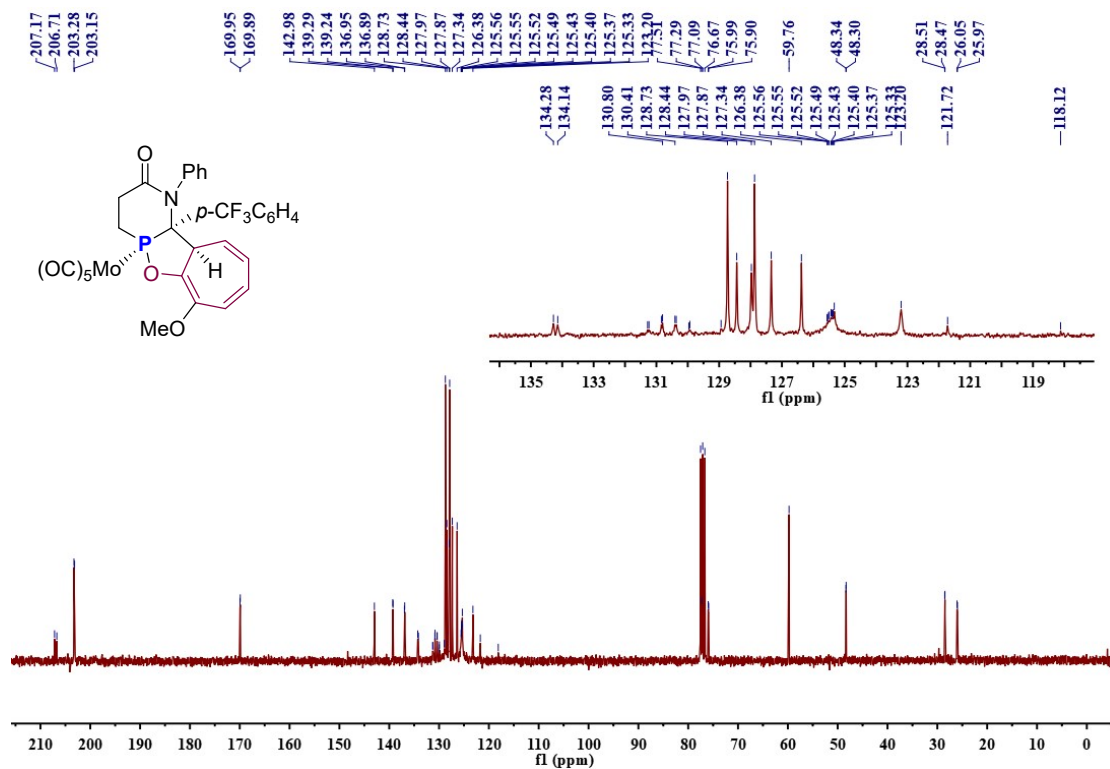

$^{13}\text{C}\{^1\text{H}\}$  NMR (75 MHz,  $\text{CDCl}_3$ ) of Compound 2h

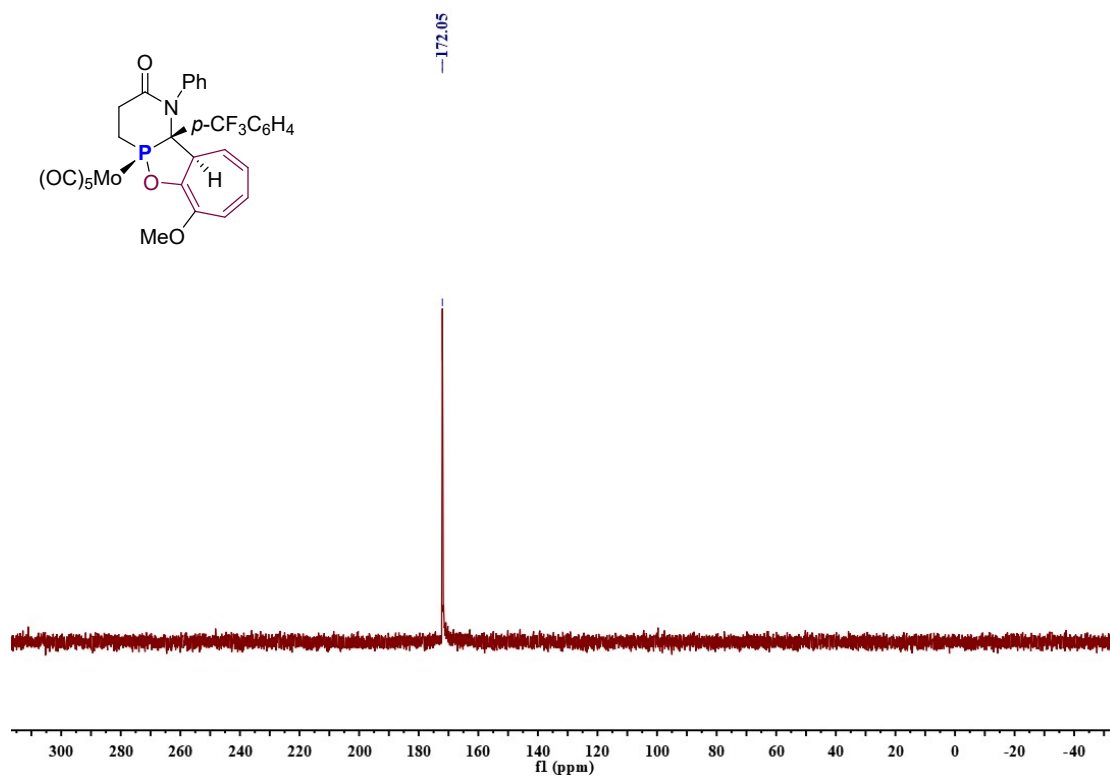

$^{31}\text{P}\{^1\text{H}\}$  NMR (121 MHz,  $\text{CDCl}_3$ ) of Compound 2h'

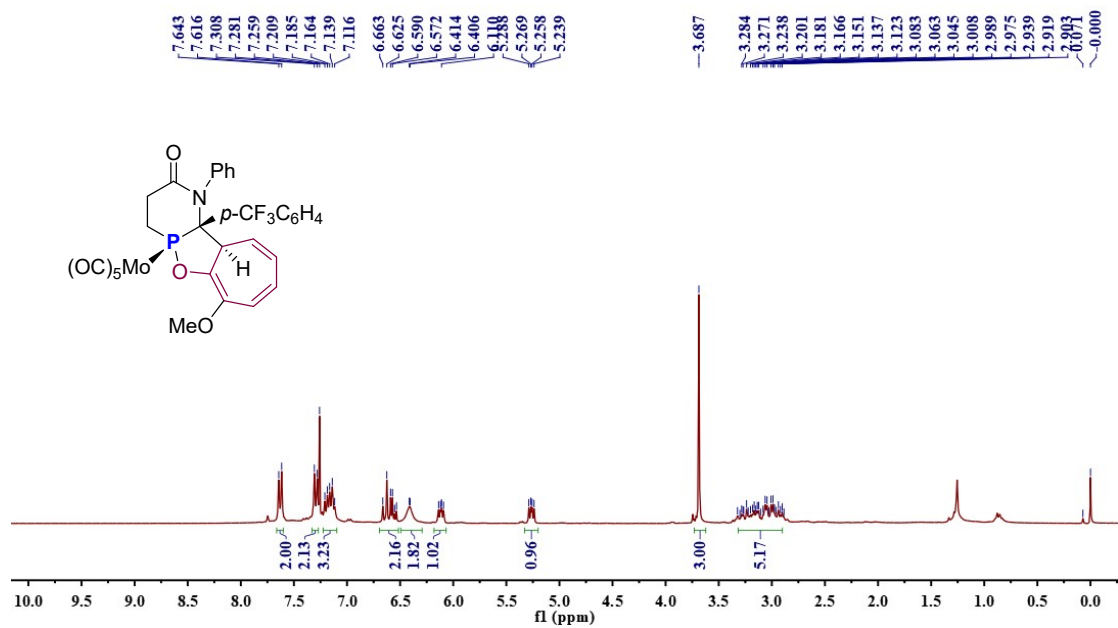

**<sup>1</sup>H NMR (300 MHz, CDCl<sub>3</sub>) of Compound 2h'**

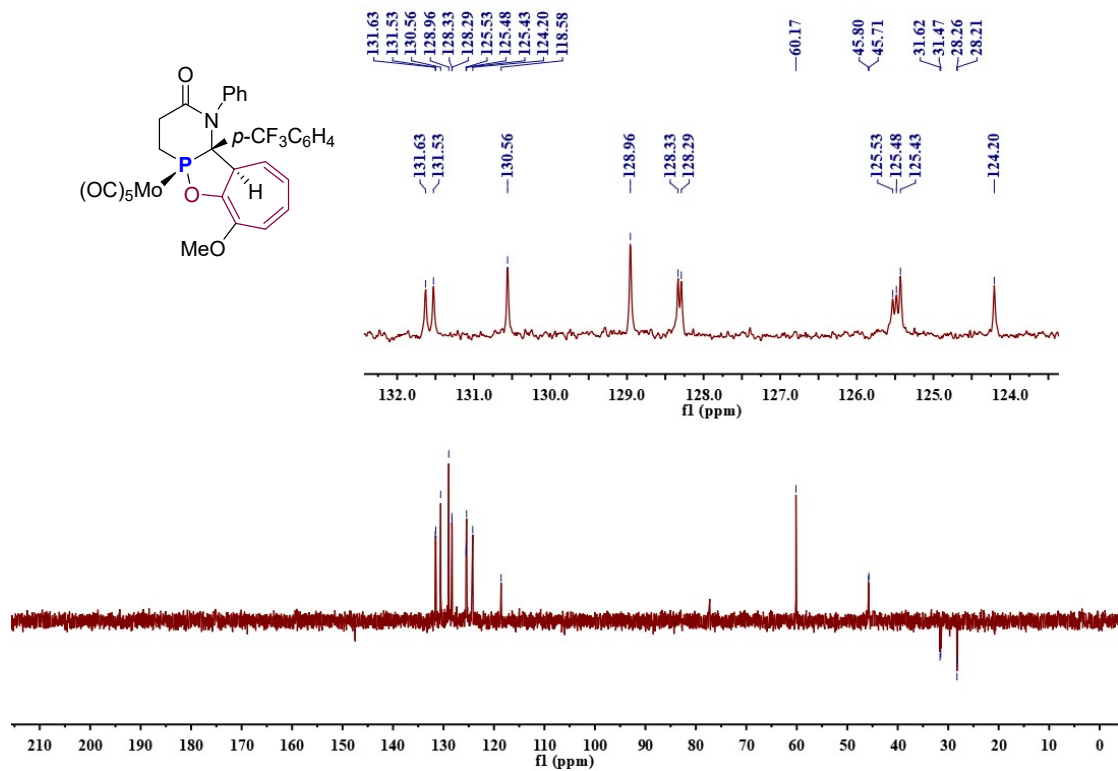

**Dept 135 NMR (75 MHz, CDCl<sub>3</sub>) of Compound 2h'**

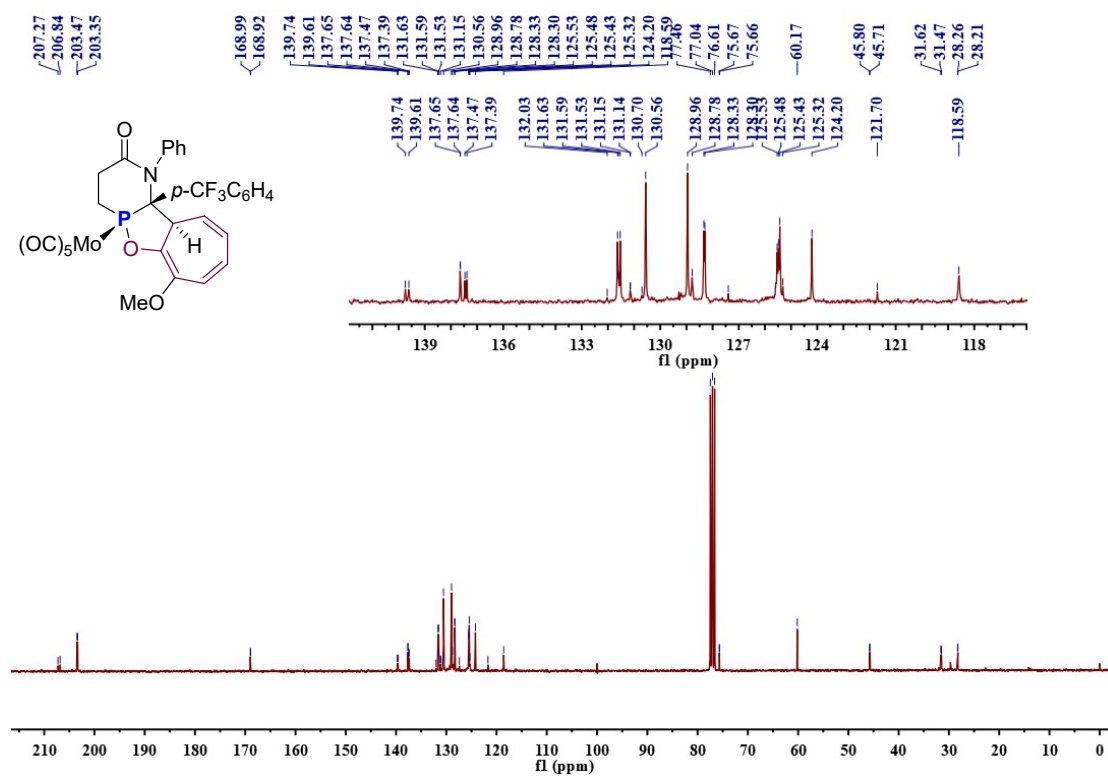

$^{13}\text{C}\{^1\text{H}\}$  NMR (75 MHz,  $\text{CDCl}_3$ ) of Compound 2h'

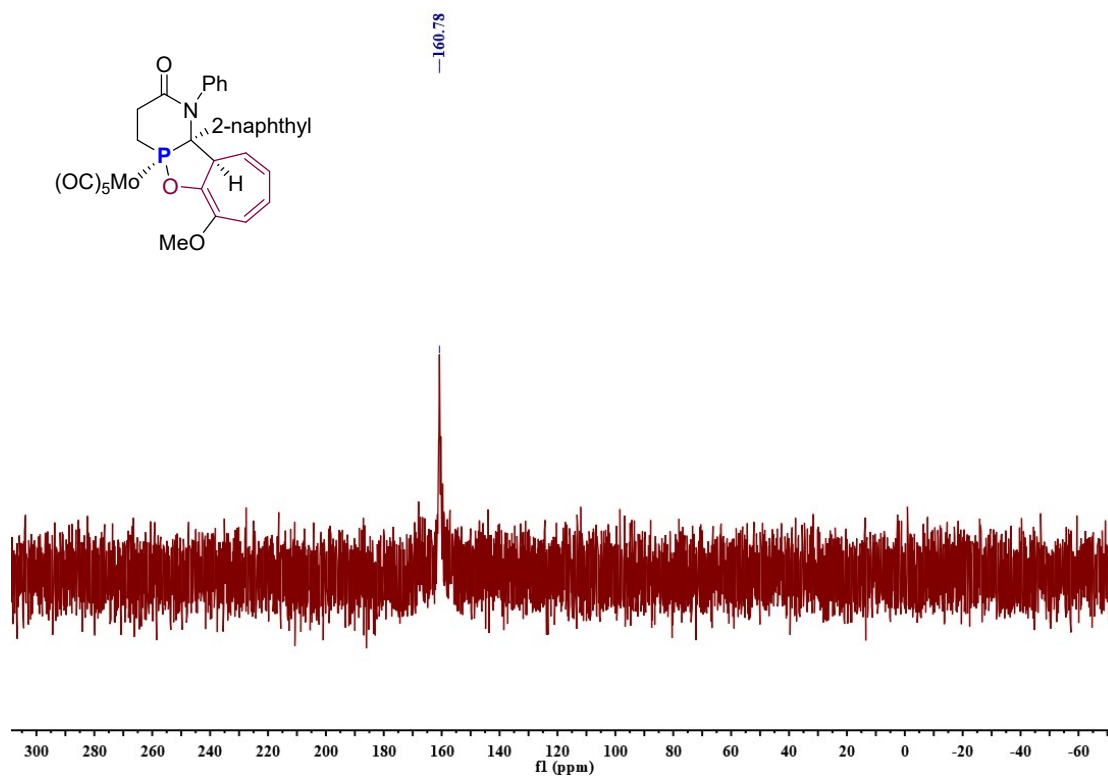

$^{31}\text{P}\{^1\text{H}\}$  NMR (121 MHz,  $\text{CDCl}_3$ ) of Compound 2i

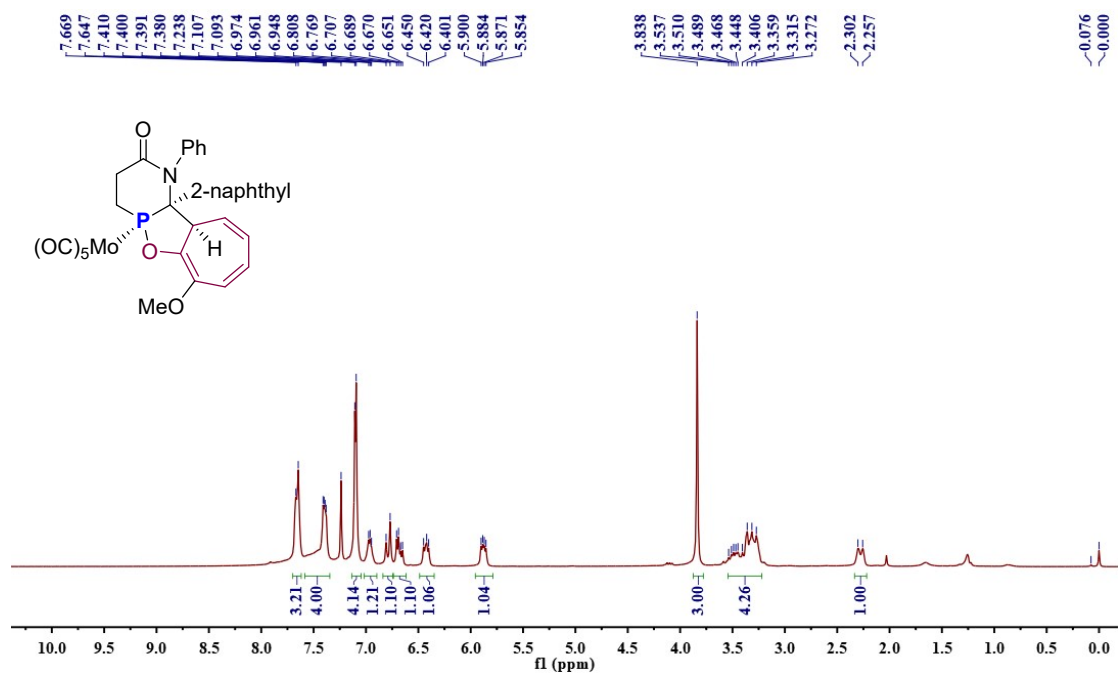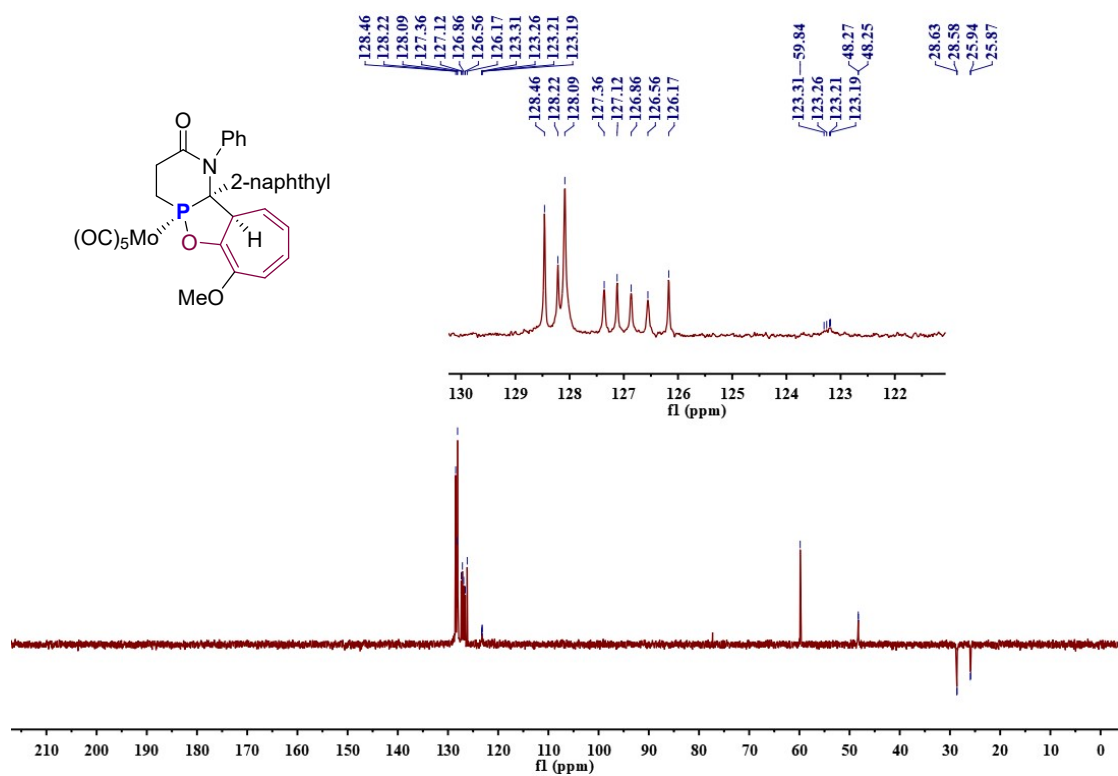

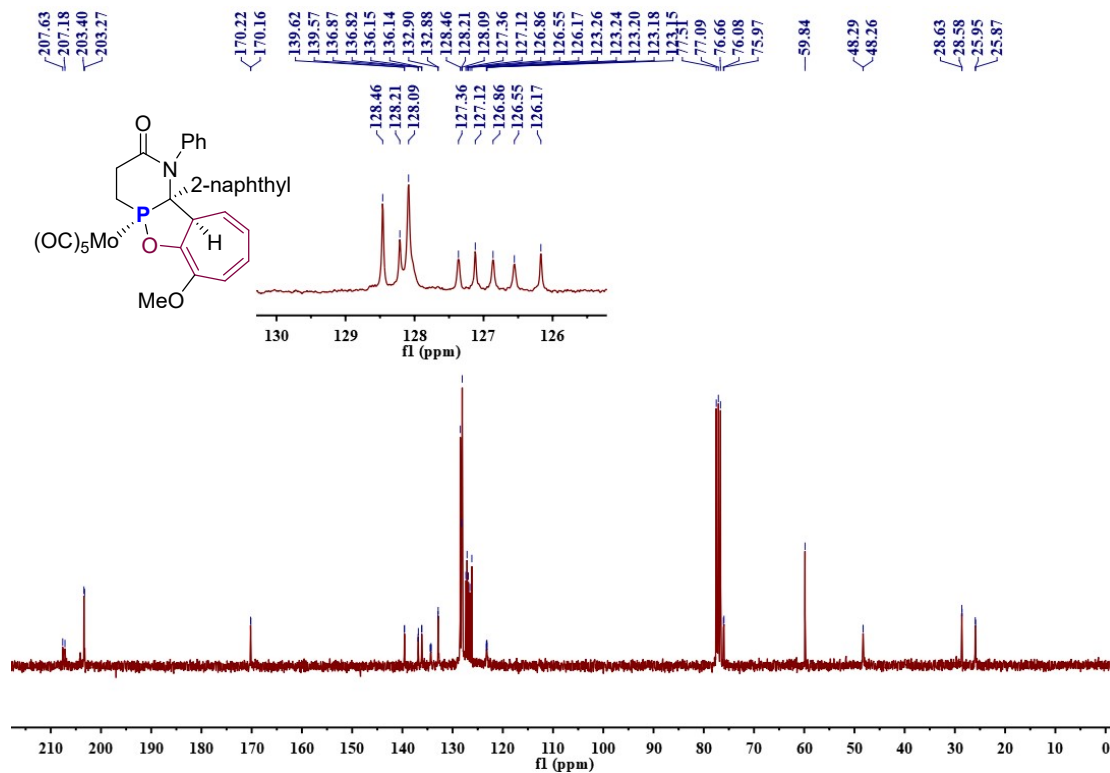

**$^{13}\text{C}\{^1\text{H}\}$  NMR (75 MHz,  $\text{CDCl}_3$ ) of Compound 2i**

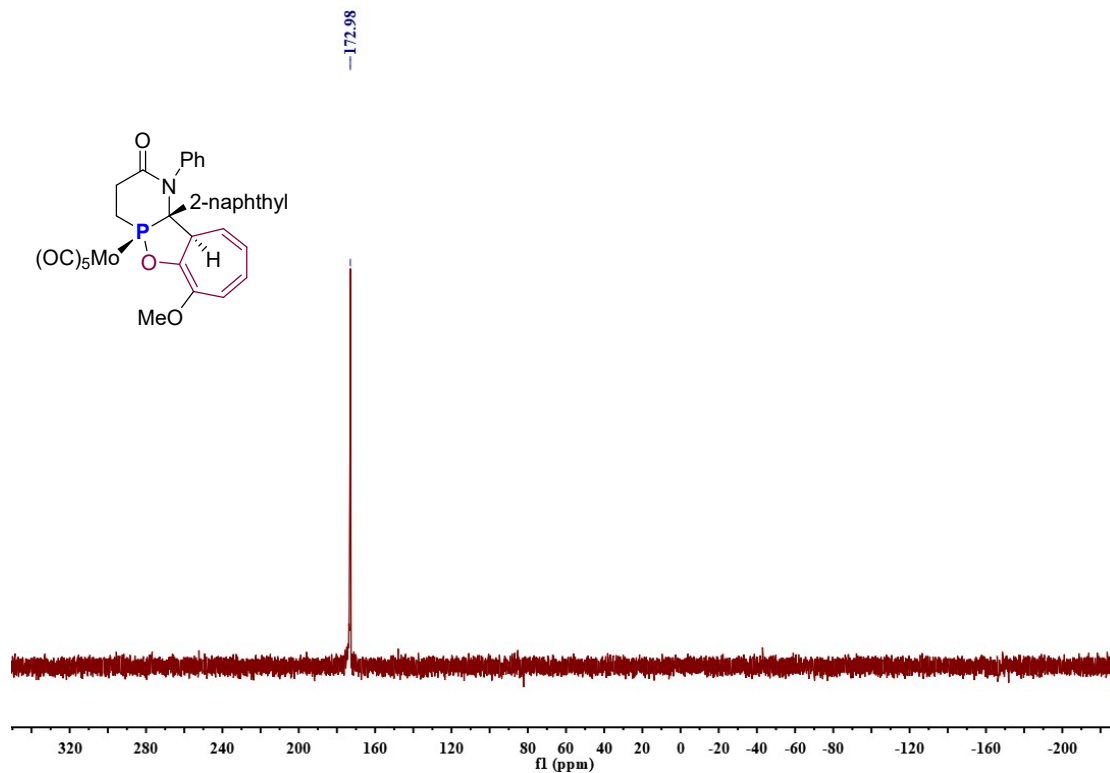

**$^{31}\text{P}\{^1\text{H}\}$  NMR (121 MHz,  $\text{CDCl}_3$ ) of Compound 2i'**



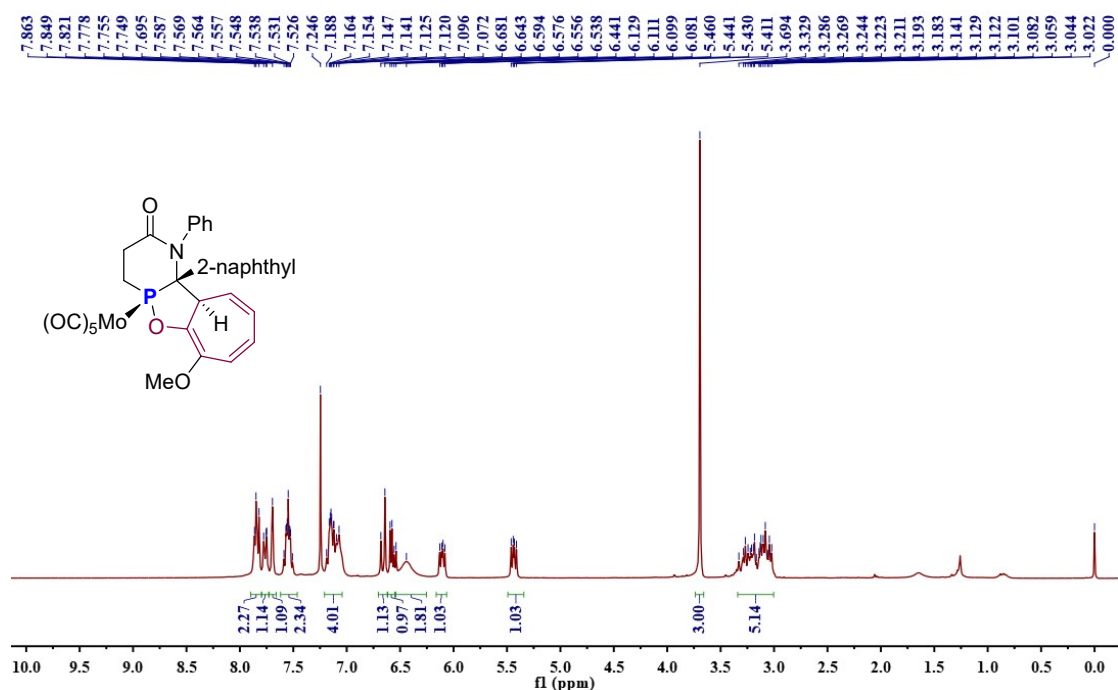

**<sup>1</sup>H NMR (300 MHz, CDCl<sub>3</sub>) of Compound 2i'**

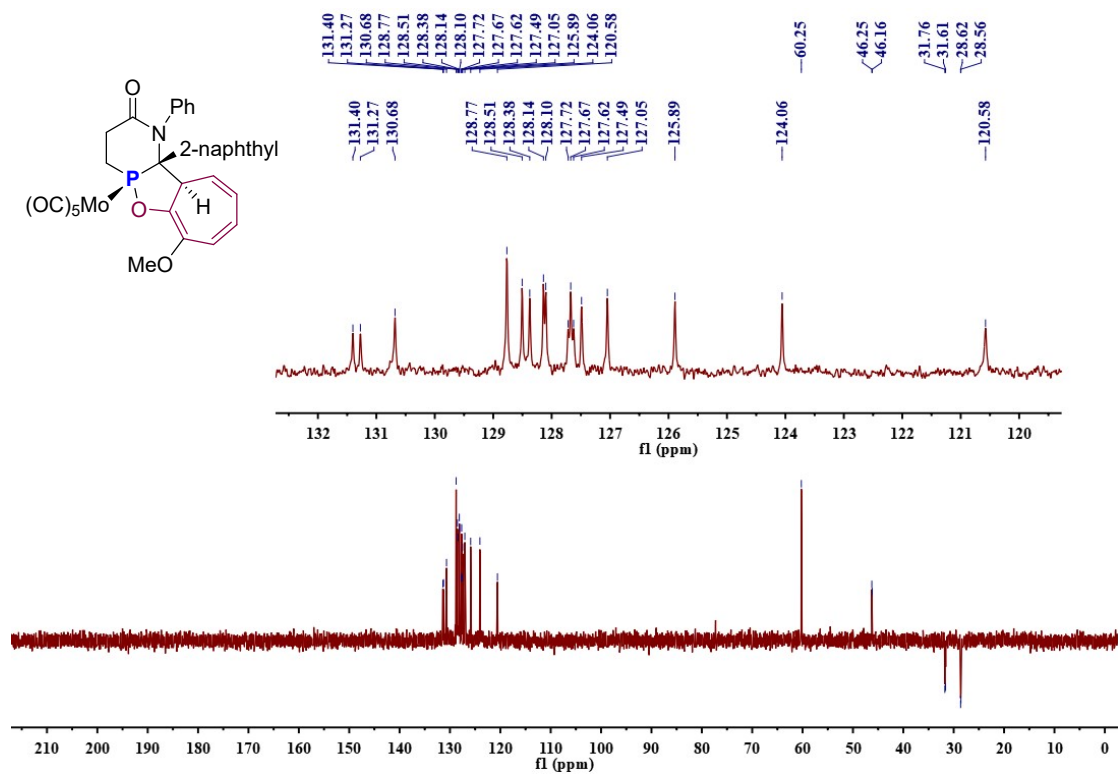

**Dept 135 NMR (75 MHz, CDCl<sub>3</sub>) of Compound 2i'**

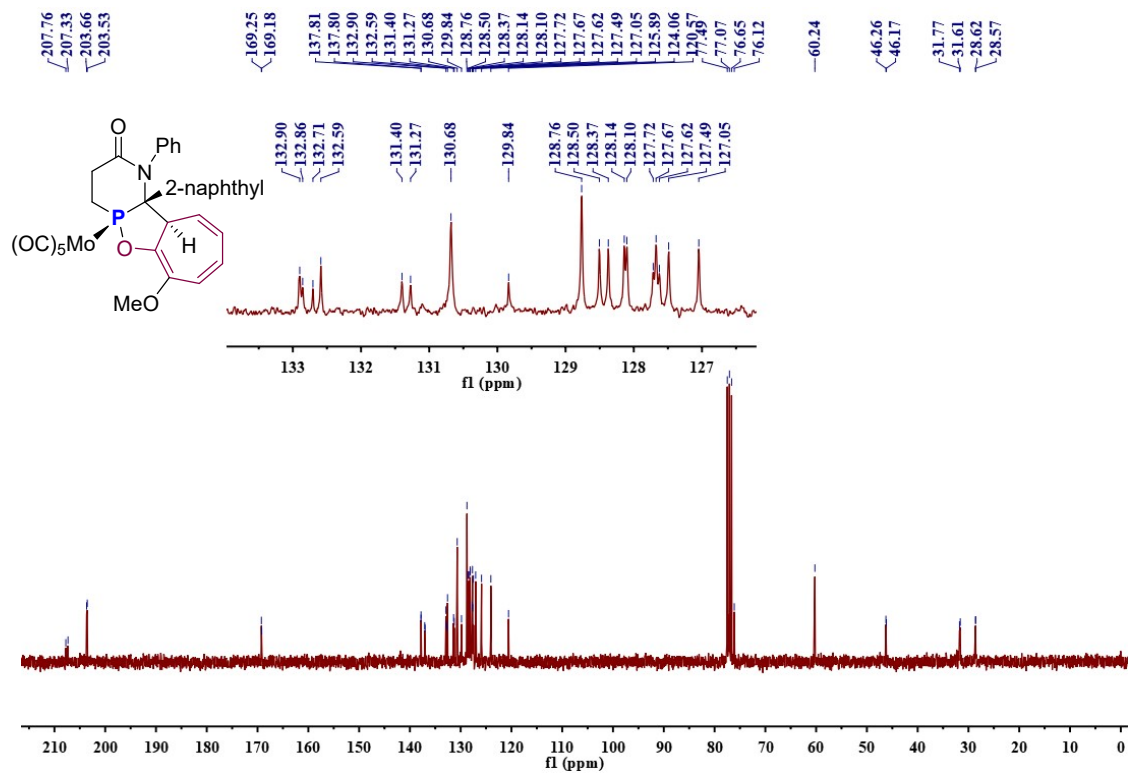

$^{13}\text{C}\{^1\text{H}\}$  NMR (75 MHz,  $\text{CDCl}_3$ ) of Compound 2i

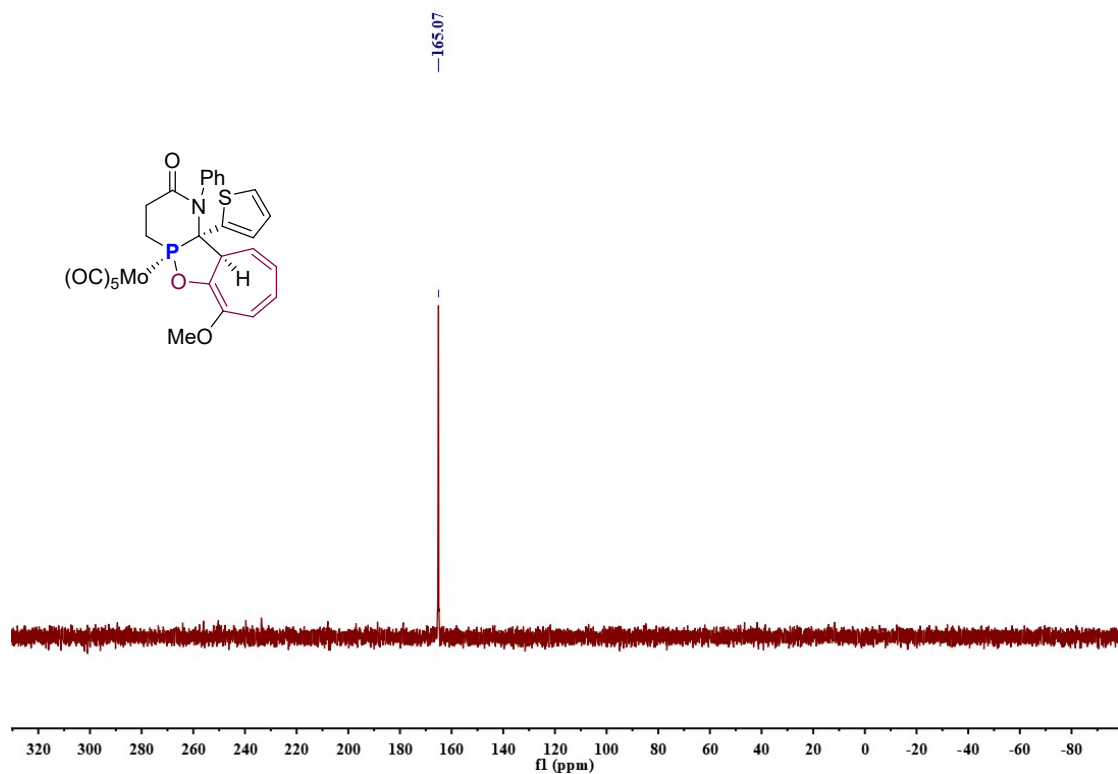

$^{31}\text{P}\{^1\text{H}\}$  NMR (121 MHz,  $\text{CDCl}_3$ ) of Compound 2j

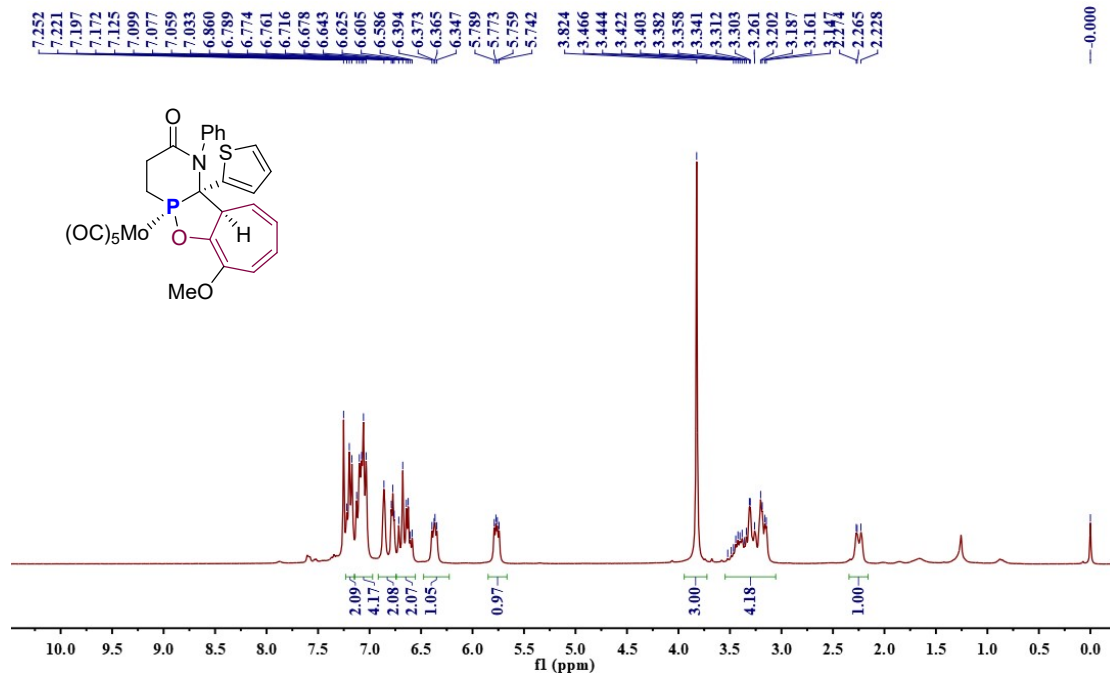

**<sup>1</sup>H NMR (300 MHz, CDCl<sub>3</sub>) of Compound 2j**

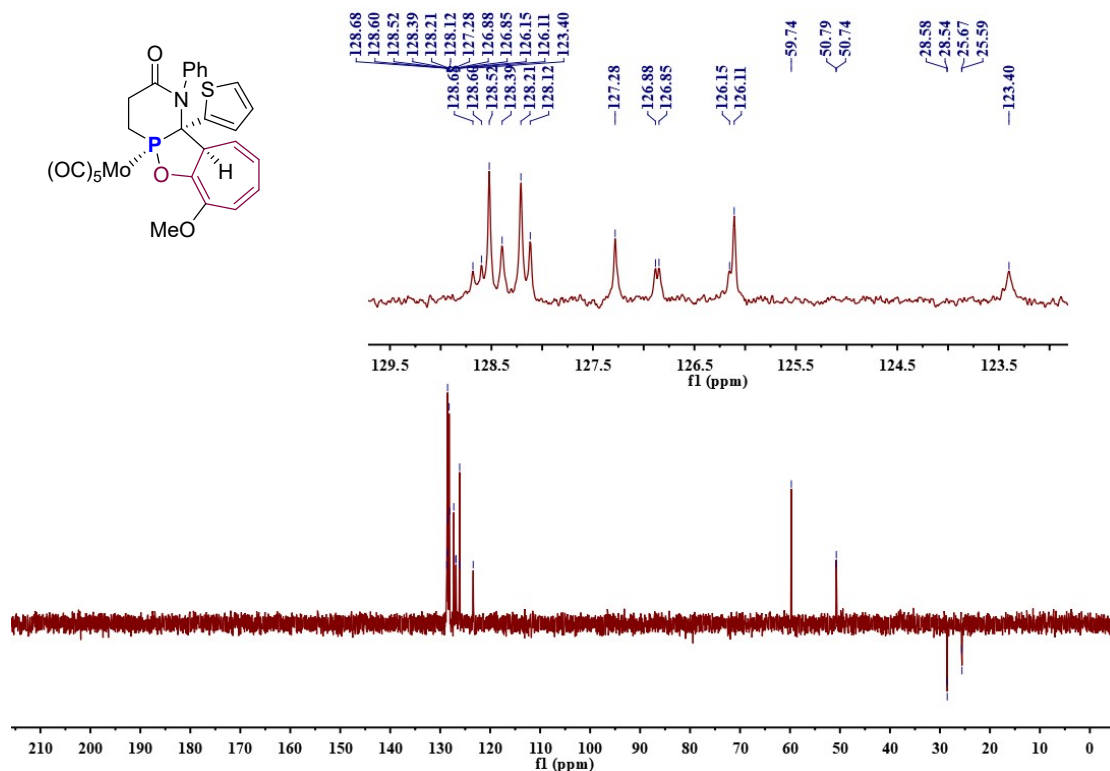

**Dept 135 NMR (75 MHz, CDCl<sub>3</sub>) of Compound 2j**

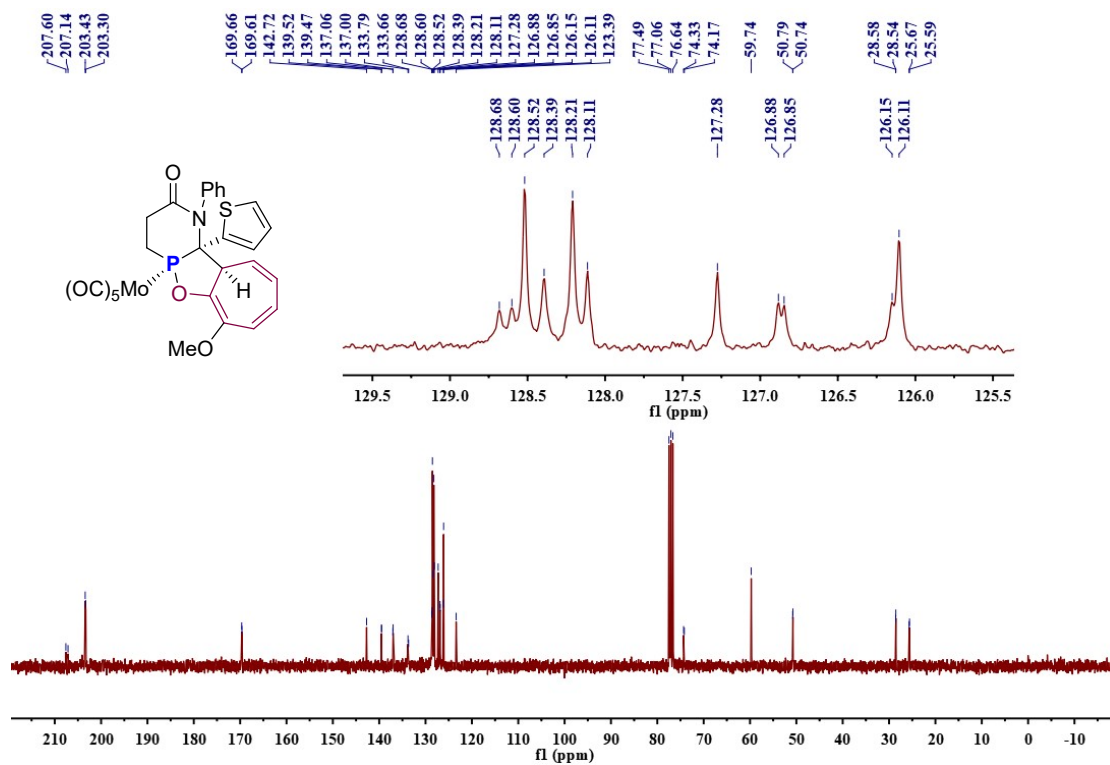

$^{13}\text{C}\{^1\text{H}\}$  NMR (75 MHz,  $\text{CDCl}_3$ ) of Compound 2j

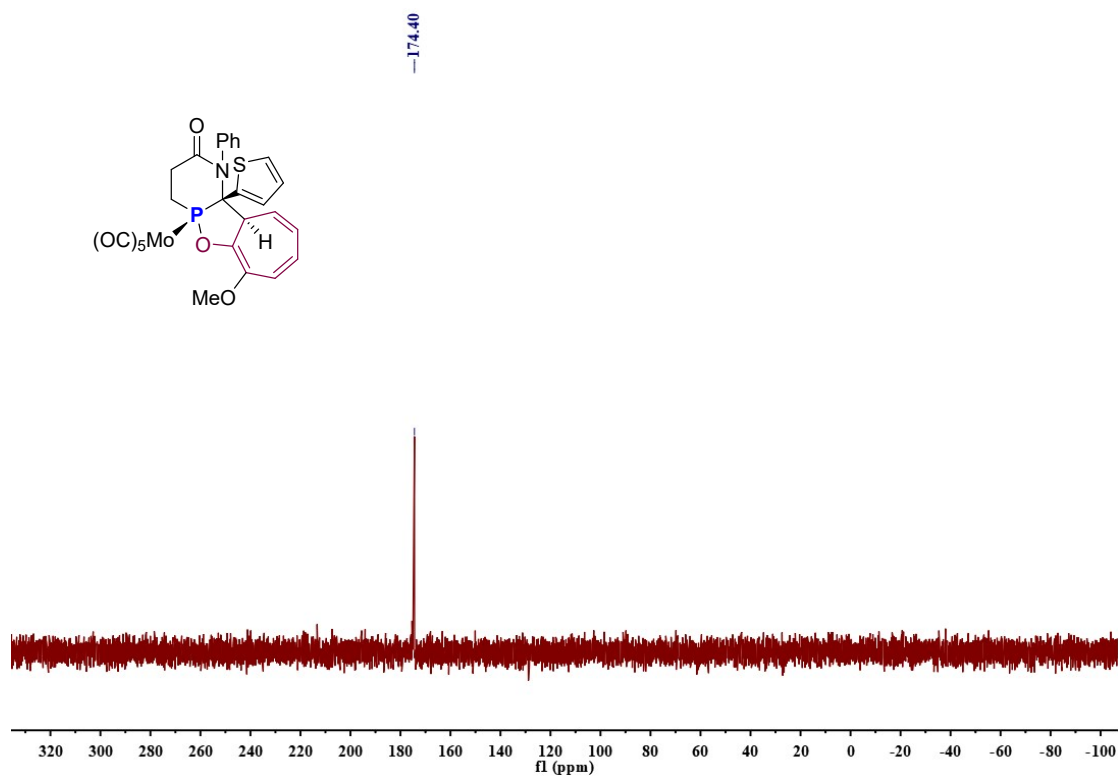

$^{31}\text{P}\{^1\text{H}\}$  NMR (121 MHz,  $\text{CDCl}_3$ ) of Compound 2j'

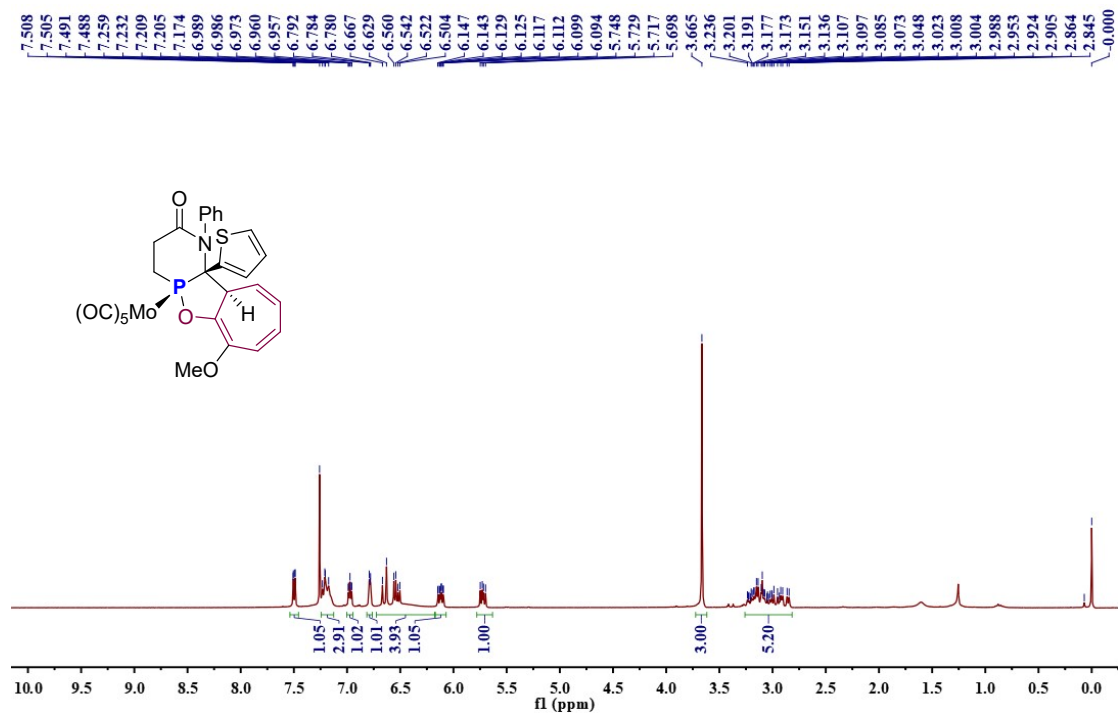

**<sup>1</sup>H NMR (300 MHz, CDCl<sub>3</sub>) of Compound 2j'**

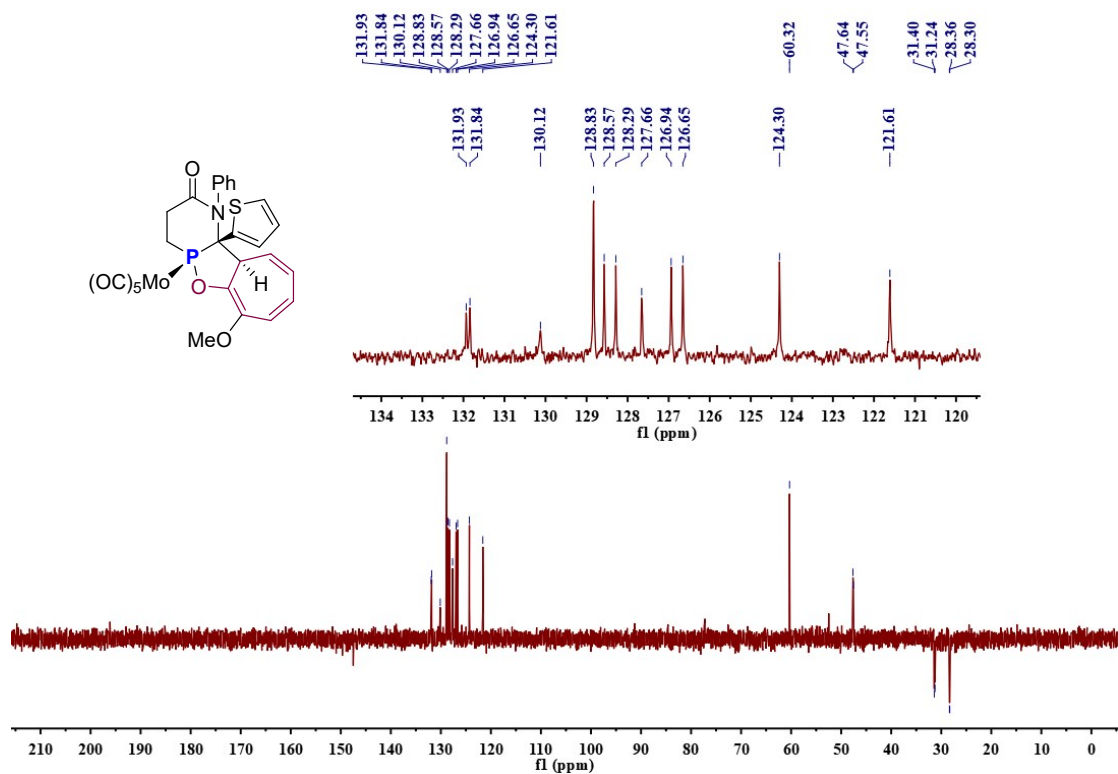

**Dept 135 NMR (75 MHz, CDCl<sub>3</sub>) of Compound 2j'**

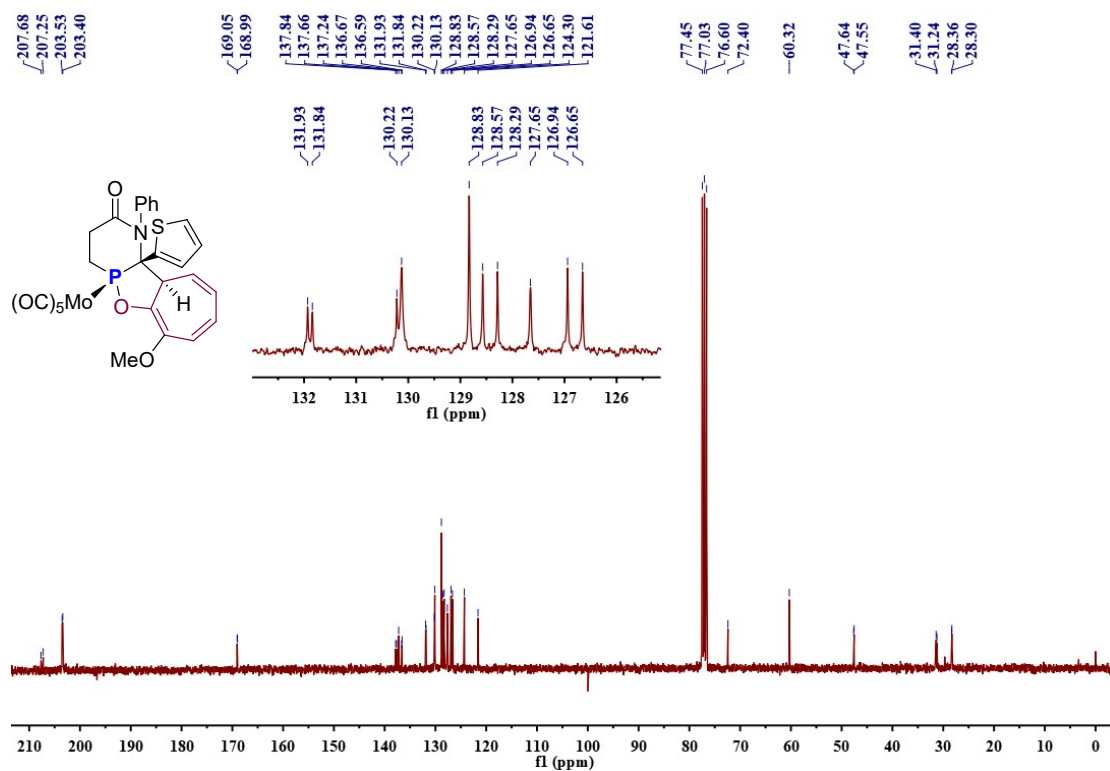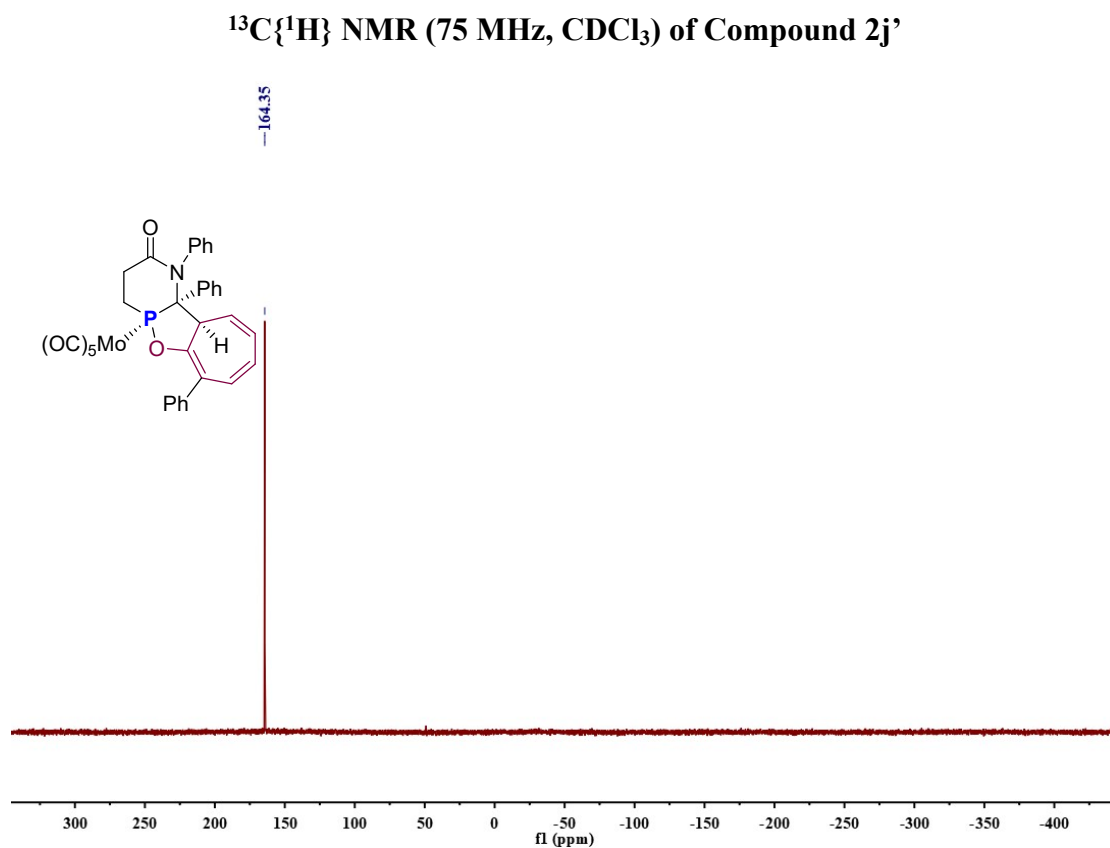

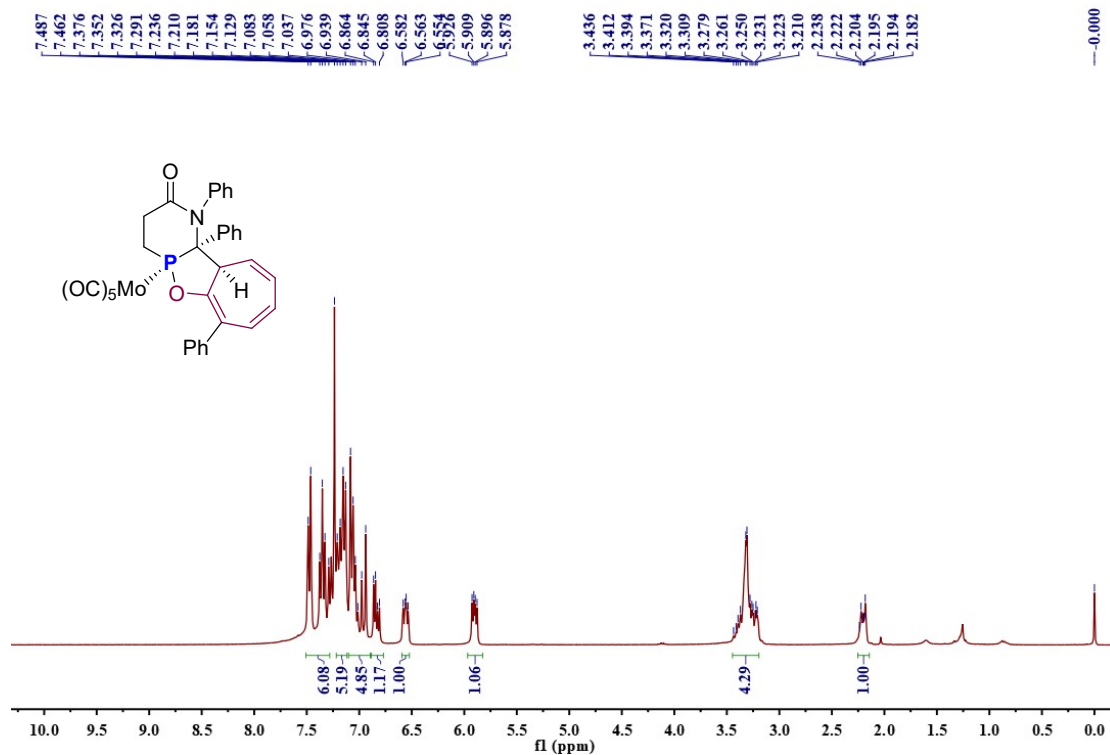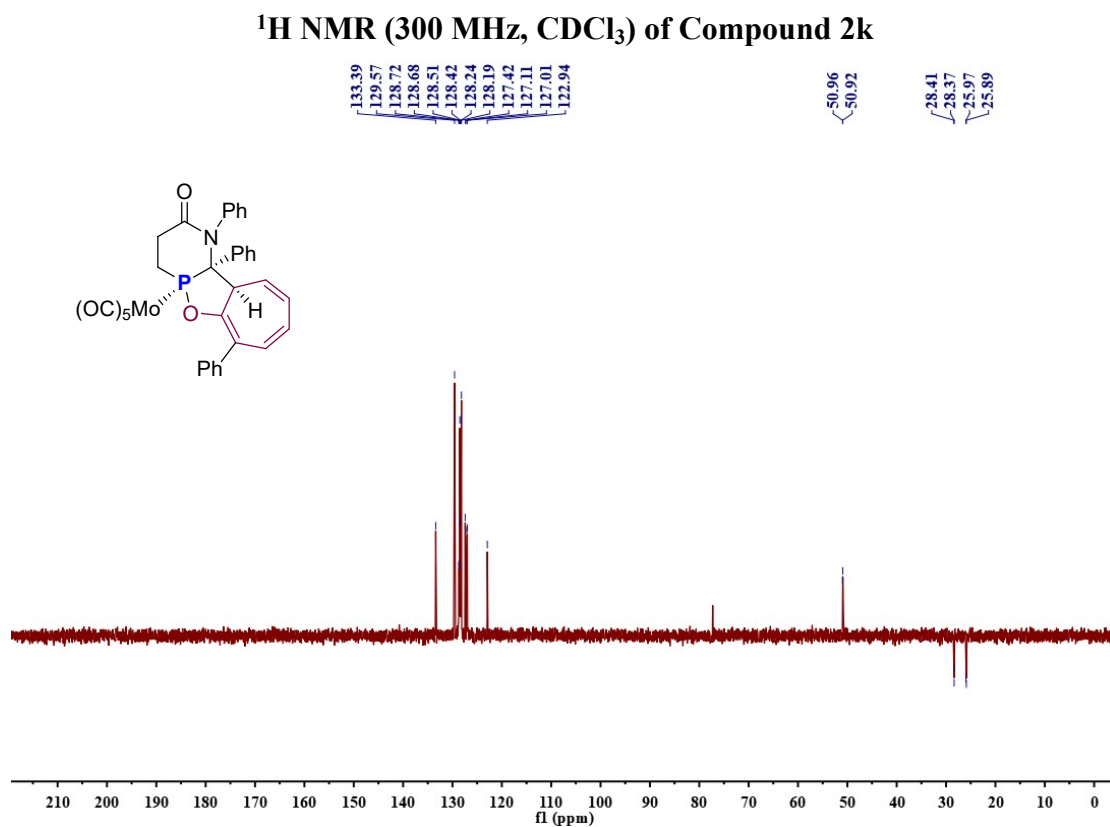

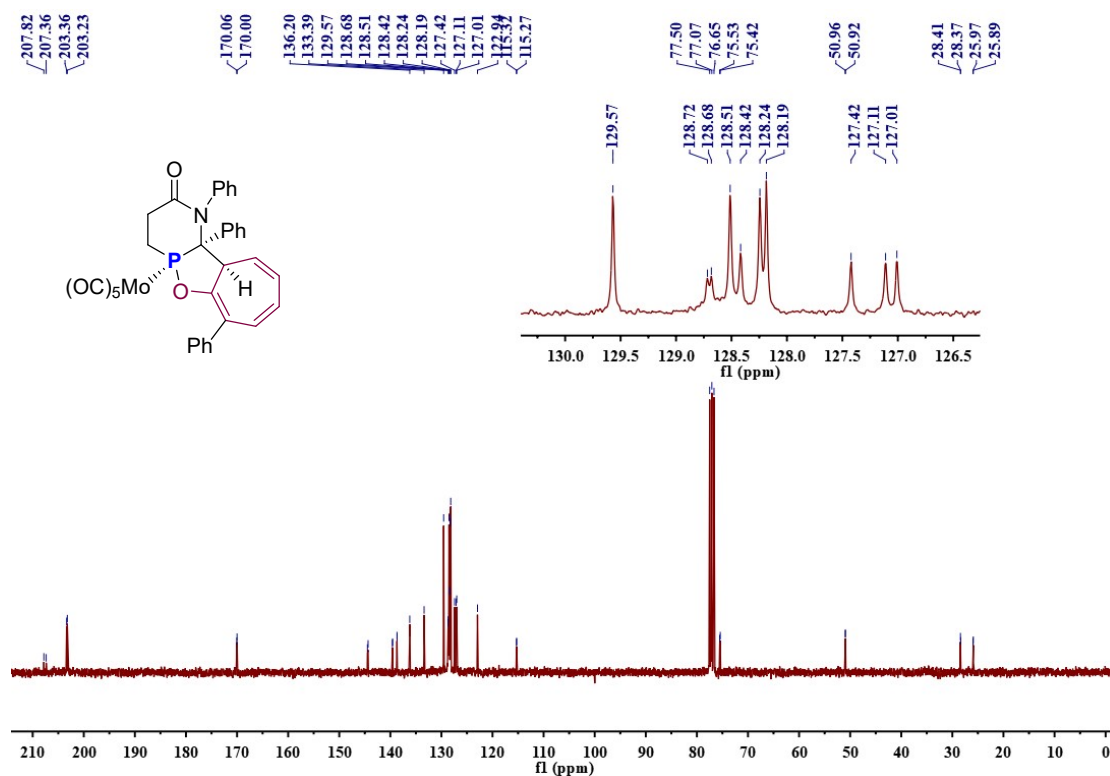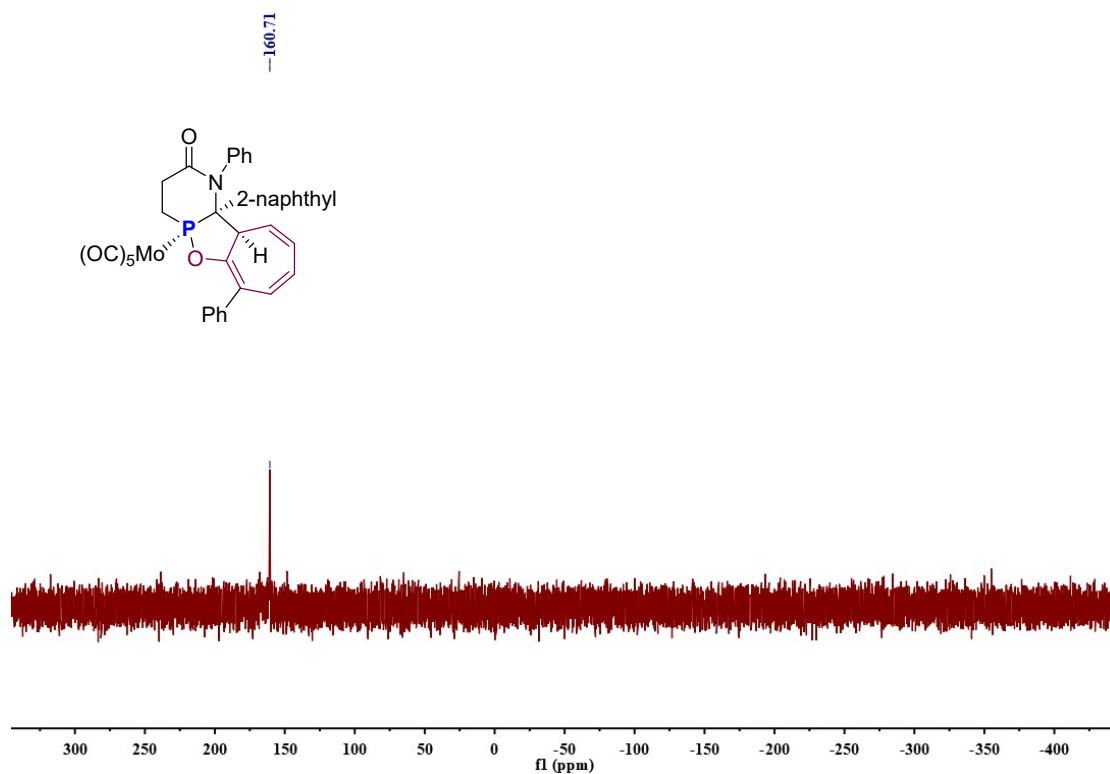



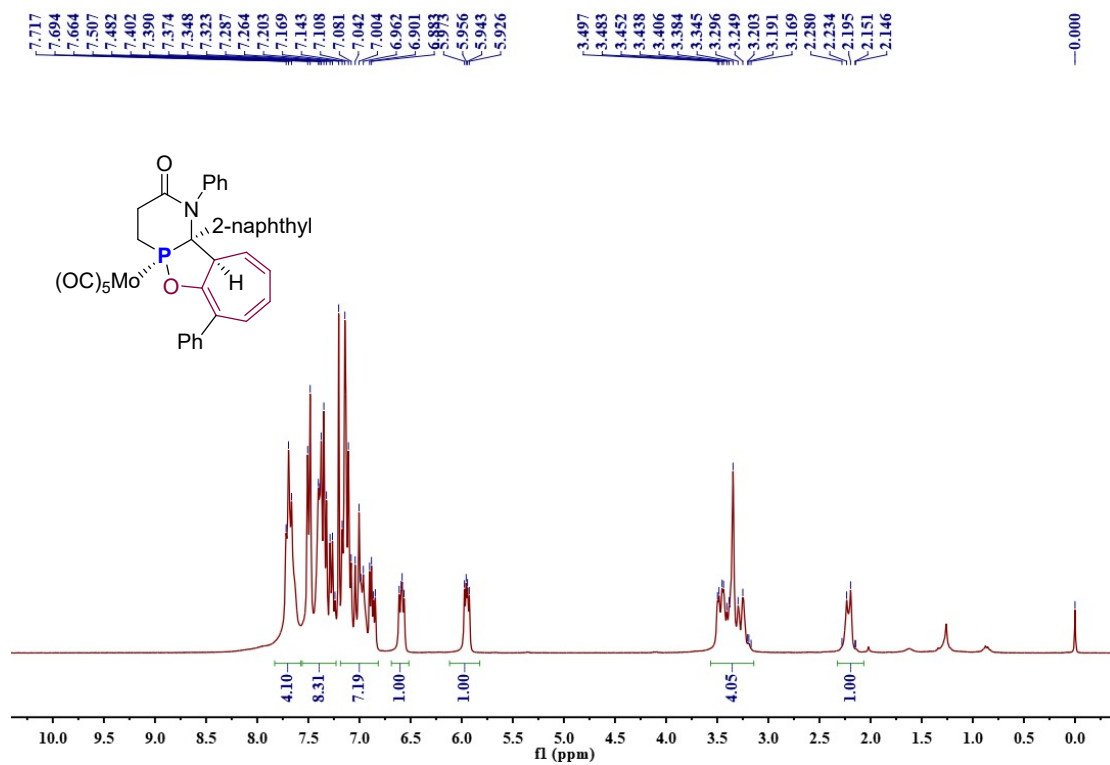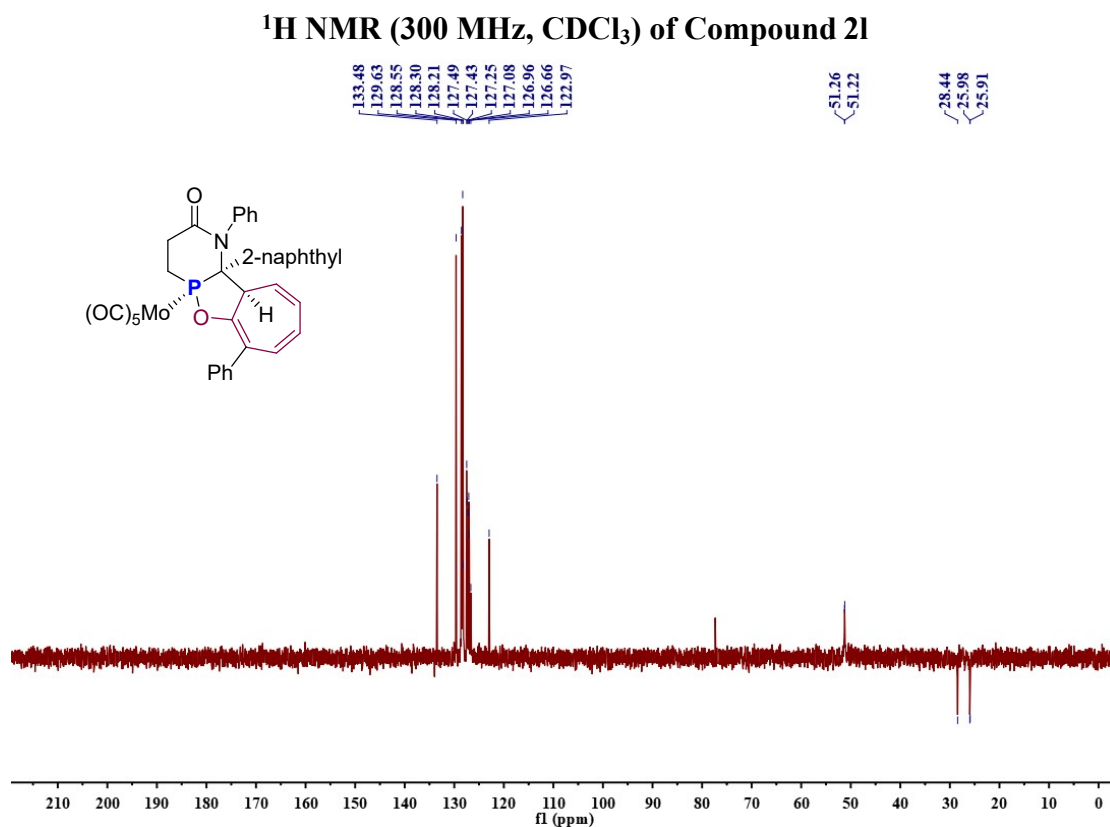

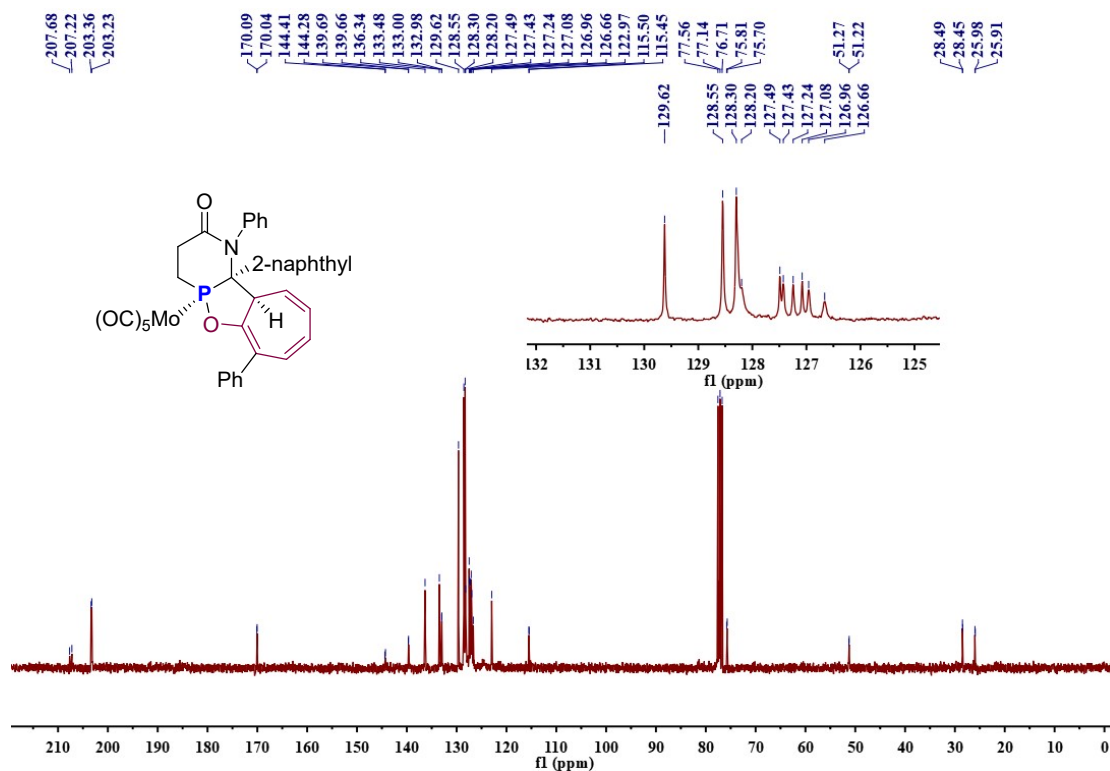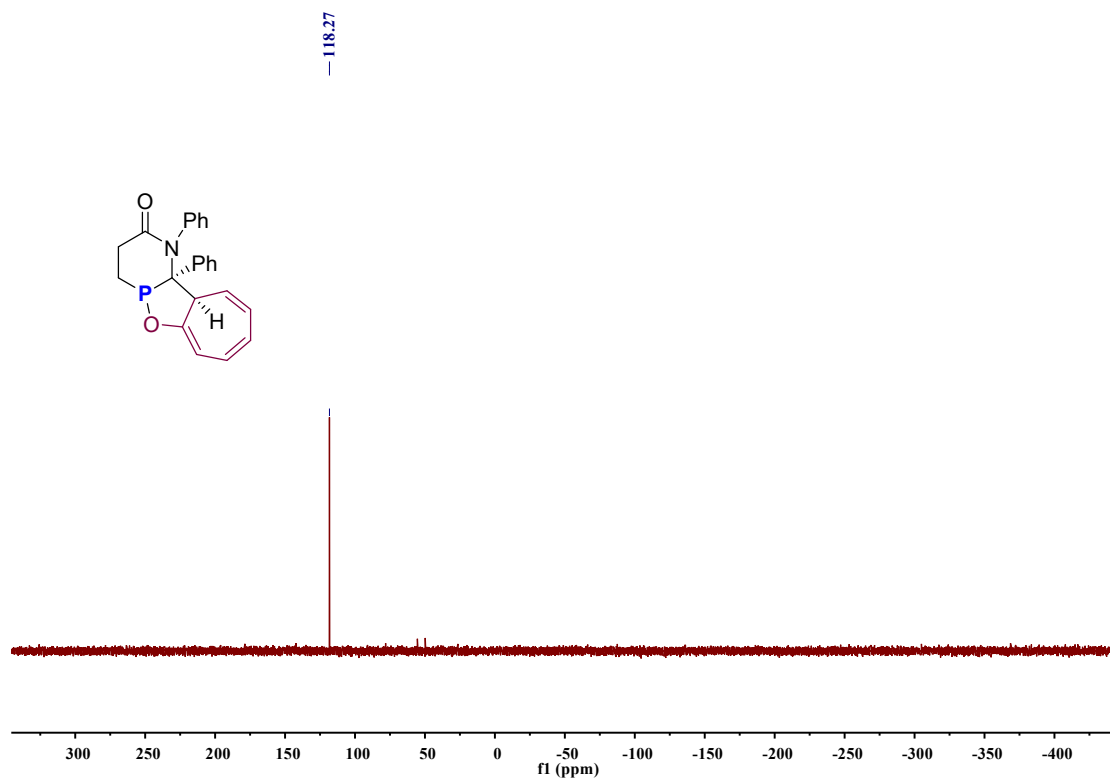

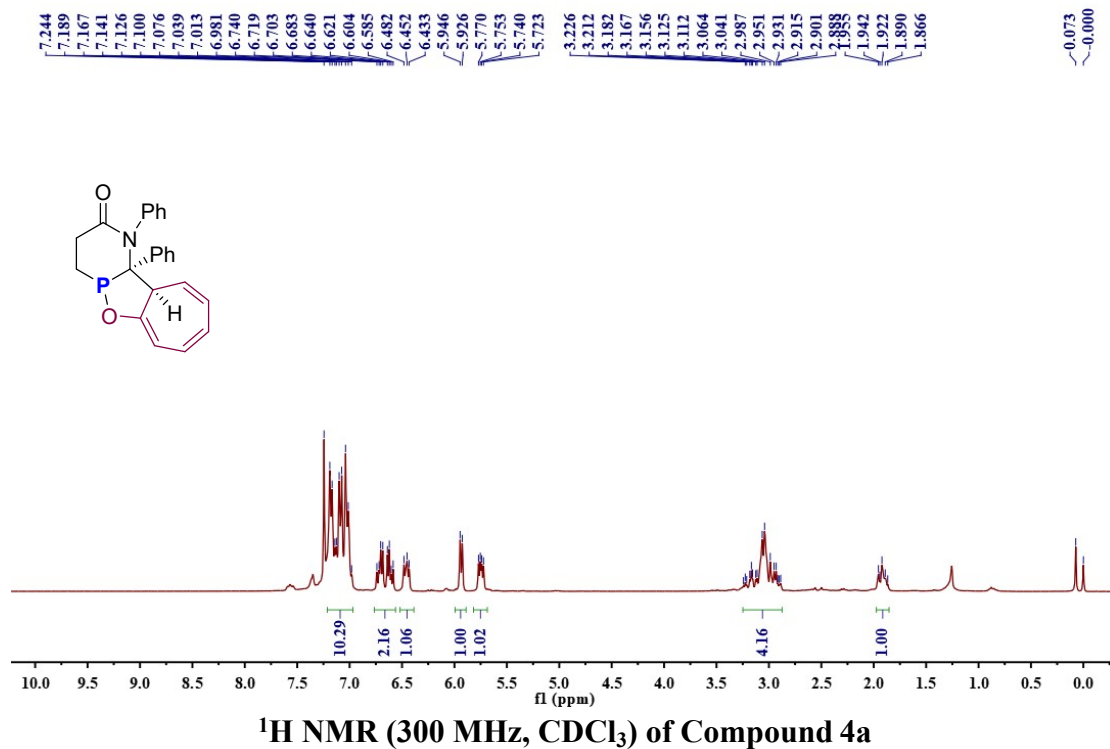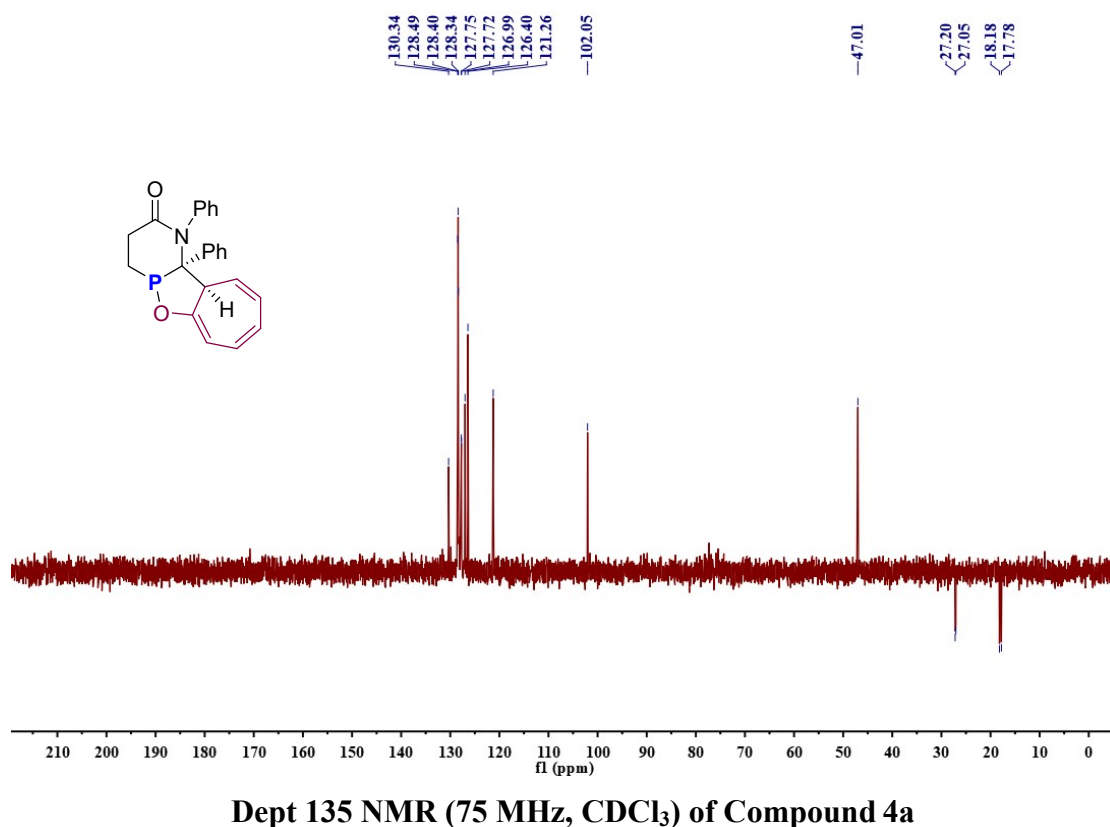

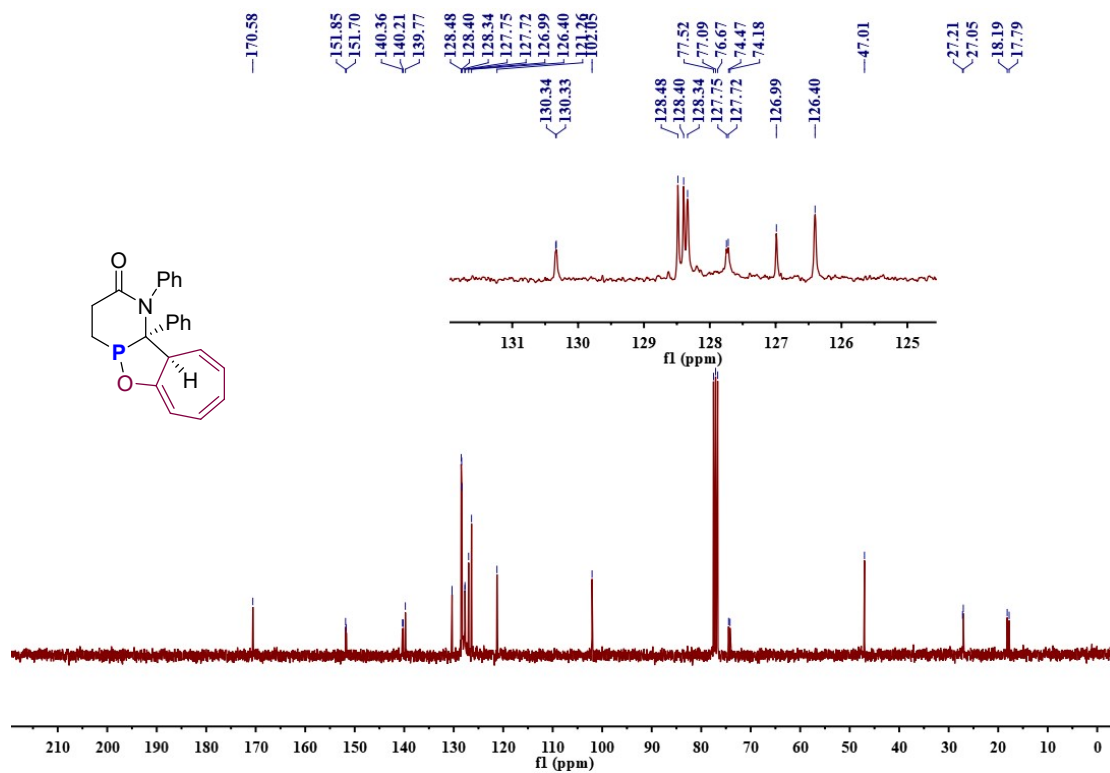

Supplement: d2qo00386d1.pdf [file d2qo00386d1.pdf]
